# Supplementary material
Source: HighWire-hosted journal article supplement (https://jnm.snmjournals.org/highwire/filestream/95228/field_highwire_adjunct_files/0/202275_Supplemental_Data.pdf)
Supplement: 202275_Supplemental_Data.pdf [file 202275_Supplemental_Data.pdf]

## ***Evidence Synthesis - Rapid Review***

---

# **Systematic Review: Somatostatin Imaging for Neuroendocrine Tumors**

### **Prepared for:**

The Society of Nuclear Medicine and Molecular Imaging  
1850 Samuel Morse Drive  
Reston, VA 20190-5316  
[www.snmami.org](http://www.snmami.org)

### **Prepared by:**

Pacific Northwest Evidence-based Practice Center  
Oregon Health & Science University  
Mail Code: BICC  
3181 SW Sam Jackson Park Road  
Portland, OR 97239  
[www.ohsu.edu/epc](http://www.ohsu.edu/epc)

### **Investigators:**

Roger Chou, MD  
Miranda Pappas, MA  
Liev Miller, BA

**May 2017**

## **Acknowledgements**

The authors acknowledge Andrew Hamilton, MLS, MS, for conducting literature searches at the Oregon Health & Science University.

## ABSTRACT

**Background.** Somatostatin receptor-positron emission tomography (SSTR-PET) is a functional imaging technique used to identify neuroendocrine tumors. The purpose of this report is to assess the comparative diagnostic accuracy of  $^{68}\text{Ga}$ -DOTATOC (gallium-68 1, 4, 7, 10-tetraazocyclodecane-1, 4, 7, 10-tetraacetic acid edotreotide) or  $^{68}\text{Ga}$ -DOTATATE (gallium-68 1, 4, 7, 10-tetraazocyclodecane-1, 4, 7, 10-tetraacetic acid (Tyr<sup>3</sup>)-octreotate) positron emission tomography (PET) versus functional imaging with octreotide coupled with radiolabeled indium-111 and the chelator diethylenetriaminepentaacetic acid ( $^{111}\text{In}$ -DTPA SPECT, referred to by the trade name OctreoScan®), 18 fludeoxyglucose-fluor-2-deoxy-D-glucose ( $^{18}\text{FDG}$ )-PET, or anatomical imaging with magnetic resonance imaging (MRI) or computed tomography (CT) for detecting neuroendocrine tumors (NETs), comparative predictive utility for predicting response to treatment with somatostatin analogues or peptide receptor radionuclide therapy (PRRT), and effects on clinical decision-making.

**Data Sources.** Searches were conducted on the Cochrane Central Register of Controlled Trials, Cochrane Database of Systematic Reviews, and Ovid MEDLINE® (through November 2016); studies were also identified from reference lists.

**Review Methods.** We selected studies of the diagnostic accuracy of  $^{68}\text{Ga}$ -DOTATATE or  $^{68}\text{Ga}$ -DOTATOC PET (with or without CT) versus OctreoScan or MRI/CT for identification of NETs, based on a reference standard consisting of histopathology or histopathology and clinical/imaging follow-up. We also included studies on effects of the utility of SSTR-PET versus alternative imaging for predicting response to somatostatin analogue therapy or PRRT,

and effects of SSTR-PET on clinical decision-making. Two reviewers independently assessed studies for inclusion and rated study quality. One reviewer abstracted data and a second checked it. Strength of evidence was assessed using GRADE methods.

**Results.** Fifteen diagnostic accuracy studies and seven studies on clinical decision-making met inclusion criteria. SSTR-PET was associated with greater sensitivity than OctreoScan (difference in sensitivity ranged from 14% to 56%) and <sup>18</sup>FDG-PET (difference in sensitivity ranged from 24% to 75%) for diagnosis of NETs. Findings were generally consistent for diagnosis of pulmonary NETs, gastroenteropancreatic (GEP) NETs, or both, as well as for primary and metastatic lesions. SSTR-PET was also associated with higher sensitivity for identification of primary NET than CT/MRI (differences in sensitivity ranged from 12% to 49%). For metastatic lesions, three studies reported inconsistent findings between SSTR-PET and MRI. Most studies reported no clear differences in specificity between SSTR-PET and alternative imaging modalities. Evidence on how comparative diagnostic accuracy varies according to tumor or patient characteristics is limited.

No study compared the utility of SSTR-PET with alternative imaging modalities for predicting response to PRRT or somatostatin analogue therapy. Two noncomparative studies of SSTR-PET found the degree of radiotracer uptake associated with the likelihood of treatment response, diagnostic accuracy was suboptimal.

Five studies found that SSTR-PET was associated with changes in management in 13% to 60% of patients, but the studies had important methodological limitations.

**Conclusions.** SSTR-PET is associated with higher sensitivity than OctreoScan and <sup>18</sup>F<sup>18</sup>FDG-PET for identification of primary and metastatic NETs, and higher sensitivity than MRI or CT for

identification of primary NETs. Research is needed to clarify the utility of SSSTR-PET for predicting response to somatostatin therapy or PRRT and effects on clinical-decision-making.

# Table of Contents

|                                                                                                                                                                                                     |    |
|-----------------------------------------------------------------------------------------------------------------------------------------------------------------------------------------------------|----|
| <b>Introduction</b>                                                                                                                                                                                 | 1  |
| <b>Methods</b>                                                                                                                                                                                      | 4  |
| Key Questions                                                                                                                                                                                       | 4  |
| Search Strategies                                                                                                                                                                                   | 5  |
| Study Selection                                                                                                                                                                                     | 5  |
| Data Abstraction                                                                                                                                                                                    | 6  |
| Assessing Methodological Quality of Individual Studies                                                                                                                                              | 6  |
| Synthesizing the Evidence and Grading the Strength of Evidence                                                                                                                                      | 8  |
| <b>Results</b>                                                                                                                                                                                      | 9  |
| Results of Literature Searches                                                                                                                                                                      | 10 |
| Key Question 1. What is the diagnostic accuracy of SSTR-PET compared with OctreoScan, <sup>18</sup> FDG-PET, and/or CT/MRI for identification of primary NET, NET metastasis, or for tumor staging? | 10 |
| Key Question 1a. How does diagnostic accuracy vary according to patient or tumor characteristics (e.g., Ki-67, grade and differentiation, or site of origin)?                                       | 16 |
| Key question 2. What is the predictive utility of SSTR-PET compared with OctreoScan, <sup>18</sup> FDG-PET, and/or CT/MRI for predicting response to PRRT or somatostatin analogue therapy?         | 17 |
| Key Question 2a. How does predictive utility vary according to patient or tumor characteristics?                                                                                                    | 18 |
| Key Question 3. What are the effects of SSTR-PET imaging compared with OctreoScan, <sup>18</sup> FDG-PET, and/or CT/MRI on clinical decision-making?                                                | 18 |
| Key Question 3a. How do effects on clinical decision-making vary according to patient or tumor characteristics?                                                                                     | 19 |
| <b>Discussion</b>                                                                                                                                                                                   | 20 |
| <b>References</b>                                                                                                                                                                                   | 23 |

## Appendixes

Appendix 1. Table of Systematic Reviews

Appendix 2. Search Strategies

Appendix 3. Literature Flow Diagram

Appendix 4. Evidence Tables

    Table 4a. Studies of Diagnostic Accuracy of SSTR-PET for Identification of NETs

    Table 4b. Summarized Characteristics of Studies of Diagnostic Accuracy of SSTR-PET for Identification of NETs

    Table 4c. Studies of Diagnostic Accuracy of SSTR-PET for Identification of NETs

    Table 4d. Studies of Treatment Changes due to SSTR-PET for Identification of NETs

Appendix 5. Quality Assessment Criteria

Appendix 6. Quality Assessment Tables

    Table 6a. Quality Assessments of Studies of Diagnostic Accuracy

    Table 6b. Quality Assessment of Cohort Studies

Appendix 7. Strength of Evidence Table

# INTRODUCTION

Neuroendocrine tumors (NETs) are a heterogeneous group of neoplasms that originate from various types of neuroendocrine cells.<sup>1-3</sup> NETs are rare, accounting for approximately 1.5% of all gastrointestinal and pancreatic neoplasms. NETs most commonly occur in the gastrointestinal tract, lungs, and pancreas, but can occur in other areas of the body (e.g., thyroid, brain). NETs can be classified broadly as those that exhibit more indolent behavior and those with an aggressive course. Indolent NETs are characterized by slow growth and progression to metastasize, and they are often associated with secretion of hormones or vasoactive substances. NETs with indolent biology include carcinoid tumors (gastrointestinal or bronchial well-differentiated neuroendocrine carcinomas), pancreatic NETs (e.g., insulinoma, gastrinoma, glucagonoma, somatostatinoma, VIPoma, or nonfunctioning pancreatic NETs), medullary thyroid cancers, and pheochromocytoma. Aggressive NETs often present at advanced stages and have a high propensity to metastasize; these tumors are generally poorly differentiated and less likely to secrete hormones or vasoactive substances. NETs with aggressive biology include small cell and large cell neuroendocrine lung cancer, high-grade poorly differentiated neuroendocrine carcinoma, extrapulmonary small cell carcinoma, Merkel cell tumor of the skin, and neuroblastoma. NETs may also present as metastatic disease with an unknown primary site.

Imaging of NETs is required for accurate diagnosis and staging, which is critical for guiding therapy (e.g., suitability for surgical resection or radionuclide therapy for surgically unresectable tumors).<sup>4</sup> NETs are characterized by high density and expression of somatostatin receptors, which can be targeted by radiolabeled peptide analogues of somatostatin and visualized using various imaging techniques.<sup>5-7</sup> Unlike traditional imaging based solely on anatomic findings (e.g., computed tomography [CT] or magnetic resonance imaging [MRI]), the

use of radionuclide images is also based on the physiological and functional characteristics of the tumor, which may help in detection of small or otherwise difficult to visualize tumors and increase specificity compared with anatomic imaging.<sup>8</sup>

Octreotide coupled with radiolabeled indium-111 and the chelator diethylenetriaminepentacetic acid (<sup>111</sup>In-DTPA, also referred to as <sup>111</sup>In-pentetreotide), has been the most widely used somatostatin analogue for functional imaging of NETs.<sup>9</sup> Visualization is performed with single-photon emission computed tomography (SPECT) scintigraphy; this imaging technique is commonly referred to by the trade name OctreoScan<sup>®</sup>. SPECT images may be fused with CT to increase resolution (SPECT/CT). However, even when coupled with CT, OctreoScan is associated with limited spatial resolution and relatively low image quality; other shortcomings include the need for a prolonged imaging protocol and relatively high radiation dose.<sup>10</sup>

More recently, positron emission tomography (PET) imaging utilizing octreotide derivatives such as (Tyr<sup>3</sup>)-octreotate (TATE) and edotreotide (TOC), coupled with positron emitting isotopes such as gallium-68 (<sup>68</sup>Ga) and the chelator 1, 4, 7, 10-tetraazocyclodecane-1, 4, 7, 10-tetraacetic acid (DOTA) have been introduced.<sup>11,12</sup> Compared with OctreoScan, PET imaging with <sup>68</sup>Ga-DOTATATE and <sup>68</sup>Ga-DOTATOC (referred to in this report as somatostatin receptor PET imaging, or SSTR-PET) is associated with increased spatial resolution and lesion detectability, potentially resulting in greater accuracy for diagnosis and staging. One recent systematic review of 22 studies found SSTR-PET or PET/CT with primarily <sup>68</sup>Ga-DOTATATE or <sup>68</sup>Ga-DOTATOC (18 studies) associated with high pooled sensitivity (93%, 95% confidence interval [CI] 91% to 94%) and specificity (96%, 95% CI 95% to 98%), with an area under the receiver operating curve (AUROC) of 0.98 (95% CI 0.95 to 1.0)<sup>13</sup> (**Appendix 1**). Another



systematic review of 10 studies found SSTR-PET or PET/CT with  $^{68}\text{Ga}$ -DOTATATE and  $^{68}\text{Ga}$ -DOTATOC associated with similar accuracy (pooled sensitivity 93% vs. 96%, respectively; pooled specificity 85% vs. 100%; AUROC 0.96 vs. 0.98).<sup>14</sup> Other advantages include shorter imaging time (<2 hours vs. 2 days for OctreoScan) and lower radiation exposure.

The purpose of this rapid systematic review is to synthesize the evidence on the comparative performance of SSTR with  $^{68}\text{Ga}$ -DOTA peptide (DOTATATE and DOTATOC) versus imaging with OctreoScan, fludeoxyglucose 18 ( $^{18}\text{F}$ FDG)-PET, or anatomic imaging with MRI/CT on diagnostic accuracy for NETs, accuracy for predicting response to treatment with somatostatin analogues or peptide receptor radionuclide therapy (PRRT), and comparative effects on clinical decision-making.

# METHODS

## Key Questions

In conjunction with an Appropriate Use Criteria (AUC) Workgroup convened by the Society of Nuclear Medicine and Molecular Imaging, we determined the scope and clinical questions for this review on SSTR for detection of NETs. The AUC Workgroup selected the NET types to focus on for this review.

### *Key Questions:*

1. What is the diagnostic accuracy of SSTR-PET compared with OctreoScan, <sup>18</sup>FDG-PET, and/or CT/MRI for identification of primary NET, NET metastasis, or for tumor staging?
  - a. How does diagnostic accuracy vary according to patient or tumor characteristics (e.g., Ki-67, grade and differentiation, or site of origin)?
2. What is the predictive utility of SSTR-PET compared with OctreoScan, <sup>18</sup>FDG-PET, and/or CT/MRI for predicting response to PRRT or somatostatin analogue therapy?
  - a. How does predictive utility vary according to patient or tumor characteristics?
3. What are the effects of SSTR-PET imaging compared with OctreoScan, <sup>18</sup>FDG-PET, and/or CT/MRI on clinical decision-making?
  - a. How do effects on clinical decision-making vary according to patient or tumor characteristics?

## Search Strategies

We searched the Cochrane Central Register of Controlled Trials, Cochrane Database of Systematic Reviews, and Ovid MEDLINE® (1996 to November 2016) for relevant studies and systematic reviews. Search strategies are shown in **Appendix 2**. We supplemented searches of electronic databases with a review of reference lists of relevant articles.

## Study Selection

Two investigators independently reviewed abstracts and full-text articles against pre-specified eligibility criteria, as defined by the Population, Interventions, Comparisons, Outcomes, Timing, and Setting (PICOTS). We included studies of patients undergoing imaging with PET with or without CT using somatostatin receptor tracers (either  $^{68}\text{Ga}$ -DOTATATE or  $^{68}\text{Ga}$ -DOTATOC) for suspicion of or confirmation of NETs compared with alternative imaging (CT alone, MRI,  $^{18}\text{F}$ -FDG PET, or OctreoScan). We included studies that reported the diagnostic accuracy of  $^{68}\text{Ga}$ -DOTATATE or  $^{68}\text{Ga}$ -DOTATOC PET for detection of NETs. We included studies that compared  $^{68}\text{Ga}$ -DOTATATE or  $^{68}\text{Ga}$ -DOTATOC PET against a reference standard consisting of histopathology; studies that did not use a histopathologic reference standard in all patients had to utilize both clinical and imaging follow-up to be included in our review. Studies could also compare  $^{68}\text{Ga}$ -DOTATATE or  $^{68}\text{Ga}$ -DOTATOC PET against another imaging modality. We excluded studies that did not use an alternative imaging modality from the index test in the reference standard. We also included studies that compared the predictive utility of SSTR-PET imaging versus the imaging modalities described above for identifying responders to PRRT or somatostatin analogue therapy.

For studies on effects of  $^{68}\text{Ga}$ -DOTATATE or  $^{68}\text{Ga}$ -DOTATOC PET on clinical decision-making and clinical outcomes, we selected studies that compared effects of  $^{68}\text{Ga}$ -DOTATATE or  $^{68}\text{Ga}$ -DOTATOC PET versus no  $^{68}\text{Ga}$ -DOTA peptide imaging or an alternative imaging modality in patients with NETs and reported effects on treatment decisions or clinical outcomes (e.g., mortality, morbidity, quality of life, and harms).

We excluded non-English language articles and studies published only as conference abstracts. The selection of literature is summarized in the literature flow diagram (**Appendix 3**).

## Data Abstraction

We extracted the following data from primary studies: study design, year, setting, country, sample size, eligibility criteria, population and clinical characteristics, imaging characteristics, and results. All study data were abstracted by one investigator and verified for accuracy and completeness by a second team member. See **Appendix 4** for evidence tables with extracted data.

## Assessing Methodological Quality of Individual Studies

Two investigators independently assessed the quality (risk of bias) of each study as “good,” “fair,” or “poor” using pre-defined criteria specific for each study design. Specifically, we used AMSTAR (Assessing the Methodological Quality of Systematic Reviews) for systematic reviews,<sup>15-17</sup> U.S. Preventive Services Task Force criteria<sup>18</sup> for randomized trials and cohort studies, and QUADAS-2<sup>19</sup> (Quality Assessment of Diagnostic Accuracy Studies-2) for studies of diagnostic accuracy (**Appendix 5**). Discrepancies were resolved through a consensus process.

Studies rated “good” are considered to have the least risk of bias and their results are generally considered valid. Good-quality systematic reviews perform comprehensive and reproducible searches and results, use pre-defined criteria for selection of studies, evaluate the quality of included studies and incorporate assessments of quality when synthesizing data, use appropriate methods for synthesizing data, and have conclusions supported by the evidence. Good-quality studies of diagnostic accuracy avoid bias in the selection of patients (e.g., enrolling consecutive patients meeting inclusion criteria or a random sample and avoiding a case-control design), perform interpretation of the reference standard blinded to the results of the imaging test and vice versa, use a valid reference standard in all patients, use pre-defined criteria to define a positive imaging test, and include all patients in the analysis. Good-quality intervention studies use valid methods to select patients for inclusion and allocate patients to treatment, report similar baseline characteristics in different treatment groups, clearly report attrition and have low attrition; use appropriate methods to reduce performance bias (e.g., blinding of patients, care providers, and outcome assessors), and use appropriate analytic methods (e.g., intention-to-treat analysis).

Studies rated “fair” are susceptible to some bias, though not enough to necessarily invalidate the results. These studies may not meet all the criteria for a rating of good quality, but no flaw is likely to cause major bias. The study may also be missing information, making it difficult to assess limitations and potential problems. The fair-quality category is broad, and studies with this rating will vary in their strengths and weaknesses. The results of some fair-quality studies are likely to be valid, while others may be only possibly valid.

Studies rated “poor” have significant flaws that imply biases of various types that may invalidate the results. They have a serious or “fatal” flaw in design, analysis, or reporting. The

results of poor-quality studies are at least as likely to reflect flaws in the study design as the true difference between the compared interventions. We rated diagnostic accuracy studies that only reported sensitivity but not specificity as poor-quality since they provide incomplete diagnostic accuracy information; we also rated studies with significant data discrepancies (e.g., reported sensitivity/specificity do not match the raw 2 x 2 numbers provided in the study) as poor-quality. We did not exclude studies rated poor-quality *a priori*, but such studies were considered to be less reliable than higher-quality studies when synthesizing the evidence, particularly when discrepancies between studies were present.

For further details about the quality of included studies and reviews see tables in **Appendix 6**.

## **Synthesizing the Evidence and Grading the Strength of Evidence**

We did not perform a meta-analysis on studies of diagnostic accuracy because the studies used different methods to assess accuracy, had heterogeneity in terms of the types of NETs evaluated, and there were methodological limitations in the studies. Instead, we synthesized the evidence qualitatively. For studies of diagnostic accuracy, we constructed 2 x 2 tables and calculated sensitivity and specificity with associated 95% CIs. If we could not construct a 2 x 2 table we relied on the diagnostic accuracy estimates as reported in the study. We constructed 2 x 2 tables using a “per-patient” approach when the data were available (i.e., patients with or without NETs), and used a “per-lesion” approach (one patient could have multiple lesions) when per-patient data were not available.

We assessed the strength of evidence for each key question, type of NET, and outcome based on the overall quality of each body of evidence (graded good, fair, or poor); the consistency of results across studies (graded consistent, inconsistent, or unable to determine when only one study was available); the directness of the evidence linking the intervention and health outcomes (graded direct or indirect); the precision of the estimate of effect, based on the number and size of studies and CI for the estimates (graded precise or imprecise); and reporting bias (suspected of undetected),<sup>20,21</sup> using methods adapted for studies of diagnostic accuracy.<sup>22,23</sup> We graded comparisons and outcomes imprecise if there were fewer than 100 total patients or if the studies reported a less than 20% difference in sensitivity or specificity between the lower and upper limits of the CI. We did not downgrade studies on diagnostic accuracy for assessing intermediate outcomes, since the key questions were specified for diagnostic accuracy.

We graded the strength of evidence for each key question using four key categories.<sup>21</sup> A “high” grade indicates high confidence that the evidence reflects the true effect and that further research is very unlikely to change our confidence in the estimate of effect. A “moderate” grade indicates moderate confidence that the evidence reflects the true effect and further research may change our confidence in the estimate of effect and may change the estimate. A “low” grade indicates low confidence that the evidence reflects the true effect and further research is likely to change the confidence in the estimate of effect and is likely to change the estimate. An “insufficient” grade indicates evidence either is unavailable or is too limited to permit any conclusion, due to the availability of only poor-quality studies, extreme inconsistency, or extreme imprecision.

See **Appendix 7** for the strength of evidence table.

# RESULTS

## Results of Literature Searches

The search and selection of articles are summarized in the literature flow diagram (**Appendix 3**). Database searches resulted in 635 potentially relevant articles. After dual review of abstracts and titles, 237 articles were selected for full-text dual review and 17 studies were determined to meet inclusion criteria and were included in this review. Data extraction and quality assessment tables for all included studies are available in tables in **Appendixes 4 and 6**.

**Key Question 1.** What is the diagnostic accuracy of SSTR-PET compared with OctreoScan, <sup>18</sup>FDG-PET, and/or CT/MRI for identification of primary NET, NET metastasis, or for tumor staging?

Fifteen studies compared the diagnostic accuracy of SSTR-PET with OctreoScan, <sup>18</sup>FDG-PET or CT/MRI (**Table 4a and 4b**).<sup>24-38</sup> Sample sizes ranged from 18 to 131; the total number of patients across all studies was 679. Two studies were conducted in the United States, nine in Europe, and four elsewhere. Five studies compared SSTR-PET with OctreoScan, four studies compared SSTR-PET with <sup>18</sup>FDG-PET, and ten studies compared SSTR-PET with CT or MRI. Four studies used <sup>68</sup>Ga-DOTATATE and ten used <sup>68</sup>Ga-DOTATOC; one study used <sup>68</sup>Ga-DOTATATE, <sup>68</sup>Ga-DOTATOC, or <sup>68</sup>Ga-DOTANOC.<sup>30</sup> Four studies evaluated accuracy for detection of various NETs (primarily gastroenteropancreatic<sup>39</sup> or pulmonary NETs),<sup>24-27</sup> four studies on accuracy for detection of GEP NETs,<sup>28,29,31,38</sup> two studies on accuracy for detection of pulmonary NETs,<sup>30,37</sup> five studies on accuracy for detection of metastatic disease due to NETs,<sup>29,32,34-36</sup> and one study on detection of unknown primary or metastatic NETs.<sup>33</sup> The



reference standards varied across studies (**Table 4b**). Four studies required histological confirmation;<sup>29,30,37</sup> in the other studies the reference standard consisted of various combinations of follow-up imaging, clinical follow-up, and histological confirmation. Eight studies analyzed diagnostic accuracy on a per-patient basis;<sup>24,27,29,30,32,34,37,38</sup> the remainder only reported accuracy on a per-lesion basis.

Two studies were rated good-quality,<sup>27,37</sup> eight studies fair-quality,<sup>24-26,31,32,34,35,38</sup> and five studies<sup>28-30,33,36</sup> poor-quality (**Table 6a**). Frequent methodological shortcomings in the fair- and poor-quality studies were unclear methods for selection of patients, use of a case-control design, and failure to report independent interpretation of the reference standard from the imaging test. In one poor-quality study,<sup>29</sup> there were significant discrepancies between the data reported and results. In five poor-quality studies, specificity was not reported and could not be calculated.<sup>28,30,33,34,36</sup>

### **SSTR-PET Compared With OctreoScan**

Five studies compared diagnostic accuracy of SSTR-PET with OctreoScan (**Table 4c**).<sup>24,25,31,33,36</sup> Two studies evaluated accuracy for detection of NETs (primarily GEP or pulmonary),<sup>24,25</sup> one study evaluated accuracy for detection of duodenopancreatic NETs,<sup>31</sup> one study evaluated accuracy for detection of unknown primary or metastatic NETs,<sup>33</sup> and one study evaluated accuracy for detection of metastatic disease.<sup>36</sup> All reported per-lesion analyses. In all studies, SSTR-PET was associated with higher sensitivity for detecting NETs than OctreoScan.

For identification of GEP or pulmonary NETs, one fair-quality study (n=50) found SSTR-PET/CT with <sup>68</sup>Ga-DOTATOC associated with higher sensitivity than OctreoScan (97% vs. 83%, McNemar's p=0.01).<sup>24</sup> Another fair-quality study (n=19) found SSTR-PET/CT with

<sup>68</sup>Ga-DOTATATE associated with higher sensitivity for detection of primary or metastatic NETs than OctreoScan (96% vs. 60%, McNemar's  $p=0.03$ ).<sup>25</sup> In both studies, specificity was high ( $\geq 95\%$ ) and similar for both SSTR-PET/CT and OctreoScan.

For diagnosis of GEP NETs in patients with multiple endocrine neoplasia (MEN) syndrome type 1, one fair-quality study ( $n=19$ ) found <sup>68</sup>Ga-DOTATOC PET/CT associated with higher sensitivity than OctreoScan (76% vs. 20%,  $p<0.0001$  for comparison of SSTR-PET/CT, OctreoScan, and CT).<sup>31</sup> SSTR-PET/CT was also associated with higher specificity (100% vs. 50%,  $p<0.01$ ).

For diagnosis of unknown primary or metastatic NETs, one poor-quality study ( $n=131$ ) found <sup>68</sup>Ga-DOTATATE PET/CT associated with higher sensitivity for identification of unknown primary or metastatic NETs than OctreoScan (95% vs. 31%,  $p<0.001$ ).<sup>33</sup> Another poor-quality study ( $n=53$ ) found <sup>68</sup>Ga-DOTATOC PET/CT associated with higher sensitivity than OctreoScan (SPECT/CT) for detection of metastatic NET lesions (99.9% vs. 60%,  $p<0.01$ ).<sup>36</sup>

### **SSTR-PET Compared With <sup>18</sup>FDG-PET**

Four studies ( $n=20$  to  $32$ ) compared the diagnostic accuracy of SSTR-PET/CT with <sup>18</sup>FDG-PET (**Table 4c**).<sup>28-30,37</sup> One study evaluated accuracy for detection of pancreatic NETs and metastatic disease,<sup>29</sup> one for detection of GEP NETs,<sup>28</sup> and two for pulmonary carcinoids.<sup>30,37</sup> In all studies, SSTR-PET/CT was associated with higher sensitivity than <sup>18</sup>FDG-PET.

For diagnosis of GEP NETs, one poor-quality study ( $n=27$ ) found <sup>68</sup>Ga-DOTATATE PET/CT associated with higher sensitivity than FDG PET/CT (95% vs. 37%, per-lesion analysis;

p not reported).<sup>28</sup> Another poor-quality study found <sup>68</sup>Ga-DOTATOC PET/CT (n=20) associated with higher sensitivity than <sup>18</sup>FDG-PET (n=8) for detection of pancreatic NETs (100% vs. 25%, per-patient analysis; p=0.03).<sup>29</sup> Specificity was not reported in either study. In the latter study, SSTR-PET/CT was also associated with higher sensitivity for detection of metastatic disease (93% vs. 20%), but data were poorly reported and the difference was not statistically significant (p=0.22).

For diagnosis of pulmonary carcinoids, two studies compared accuracy of SSTR-PET/CT with <sup>18</sup>FDG PET/CT using a per-patient analysis.<sup>30,37</sup> One good-quality study (n=32) found <sup>68</sup>Ga-DOTATOC PET/CT associated with higher sensitivity than <sup>18</sup>FDG PET/CT (96%, 95% CI 80% to 99.9% vs. 69%, 95% CI 48% to 86%).<sup>37</sup> Specificity was 100% for both modalities. A poor-quality study (n=33) found <sup>68</sup>Ga-DOTATOC, <sup>68</sup>Ga-DOTATATE, or <sup>68</sup>Ga-DOTANOC PET/CT associated with higher sensitivity than <sup>18</sup>FDG-PET/CT, though the difference was not statistically significant (79% vs. 55%, p=0.13).<sup>30</sup> In a stratified analysis from this study, SSTR-PET/CT was associated with higher sensitivity than <sup>18</sup>FDG PET/CT for typical carcinoids (91% vs. 35%, p<0.001) but worse sensitivity for atypical carcinoids (50% vs. 100%, p=0.04).

### **SSTR-PET Compared With CT/MRI**

Ten studies (n=19 to 131) compared the diagnostic accuracy of SSTR-PET or PET/CT with CT or MRI (**Table 4c**). Two studies evaluated accuracy for detection of NETs (primarily GEP or pulmonary),<sup>25,27</sup> four studies evaluated accuracy for detection of GEP NETs,<sup>26,29,31,38</sup> four studies evaluated accuracy for detection of metastatic disease,<sup>29,32,34,35</sup> and one study accuracy for detection of unknown primary or metastatic NETs.<sup>33</sup> Across studies and tumor types, SSTR-PET was generally associated with higher sensitivity than CT or MRI, though differences were not

always statistically significant; a potential exception was similar accuracy of SSTR-PET and MRI for detection of metastatic disease.

For identification of NETs (primarily GEP or pulmonary), one good-quality study (n=84) found  $^{68}\text{Ga}$ -DOTATOC PET associated with higher sensitivity (97% vs. 61%) and specificity (92% vs. 71%) than CT, based on a per-patient analysis (McNemar's  $p < 0.001$ ).<sup>27</sup> A fair-quality study (n=19) found  $^{68}\text{Ga}$ -DOTATATE PET/CT associated with higher sensitivity (96% vs. 72%) than MRI, based on a per-lesion analysis, though the difference was not statistically significant ( $p = 0.08$ ).<sup>25</sup> Specificity was similar for SSTR-PET/CT and MRI (97% vs. 100%).

For identification of GEP NETs, one fair-quality study (n=19) found  $^{68}\text{Ga}$ -DOTATOC PET/CT associated with higher sensitivity than CT for identification of duodenopancreatic NETs in MEN1 patients (76% vs. 60%,  $p < 0.0001$  for comparison of SSTR-PET/CT, OctreoScan, and CT), as well as higher specificity (100% vs. 50%,  $p < 0.01$ ), based on a per-lesion analysis.<sup>31</sup> Another fair-quality study (n=21) found  $^{68}\text{Ga}$ -DOTATOC PET/CT associated with higher sensitivity (92% vs. 43%) and specificity (94% vs. 61%) than CT for detection of NETs in MEN1 patients (per lesion analysis,  $p < 0.001$ ).<sup>26</sup> A third fair-quality study found  $^{68}\text{Ga}$ -DOTATOC PET/CT (n=19) associated with slightly higher sensitivity than CT (n=16) for detection of duodenopancreatic NETs (85% vs. 73%), but the difference was not statistically significant.<sup>38</sup> Specificity was similar for the two imaging modalities (83% vs. 80%). A poor-quality study (n=20) found  $^{68}\text{Ga}$ -DOTATOC PET/CT associated with higher sensitivity than CT for detection of pancreatic NETs, based on a per-patient analysis, but the difference was not statistically significant (100% vs. 83%,  $p = 0.06$ ).<sup>29</sup> In this study, SSTR-PET/CT was also associated with higher sensitivity for detection of metastatic disease (93% vs. 57%), but data were poorly reported and the difference was not statistically significant ( $p = 0.12$ ).

For identification of unknown primary or metastatic NETs, one poor-quality study (n=131) found  $^{68}\text{Ga}$ -DOTATATE PET/CT associated with higher sensitivity than CT or MRI (95% vs. 45%, per-lesion analysis;  $p<0.001$ ).<sup>33</sup>

For detection of metastatic disease, one fair-quality study (n=51) found  $^{68}\text{Ga}$ -DOTATOC PET associated with higher sensitivity than CT for detection of NET bone metastases (97% vs. 58%,  $p<0.001$ ), based on a per-patient analysis.<sup>32</sup> Specificity was similar (92% vs. 99.8%). Another fair-quality study (n=51) found  $^{68}\text{Ga}$ -DOTATOC PET/CT, MRI, and CT associated with similar sensitivity and specificity for detection of metastatic disease in persons with NETs suspected of having metastatic spread, based on a per-patient analysis.<sup>34</sup> Sensitivity ranged from 90% to 98% for the three modalities and specificity from 90% to 100%. Based on a per-lesion analysis, SSTR PET/CT and MRI were associated with higher sensitivity (91% to 92%) than CT (81%); specificity was higher for SSTR PET/CT (59%) than for MRI or CT (15% to 17%).

One fair-quality study (n=22) found  $^{68}\text{Ga}$ -DOTATOC PET/CT associated with somewhat lower sensitivity than MRI for differentiating liver metastases due to NET lesions (74% vs. 88%).<sup>35</sup> Sensitivity of CT (68%, 95% CI 59% to 77%) was similar to SSTR-PET/CT. Specificity of all three imaging modalities was similar (85% to 88%). SSTR PET/MRI was associated with sensitivity similar to MRI (91%, 95% CI 84% to 96%) and slightly higher specificity (95%, 95% CI 88% to 99%) than the other modalities.

Key Question 1a. How does diagnostic accuracy vary according to patient or tumor characteristics (e.g., Ki-67, grade and differentiation, or site of origin)?

Evidence on how diagnostic accuracy varies according to tumor characteristics is limited. Poorly differentiated NETs tend to have poorer SSTR expression and greater glucose transport due to the rapid proliferation of cells, which may make them more amenable to detection using  $^{18}\text{F}$ FDG PET.<sup>40</sup> However, the only study meeting inclusion criteria that stratified diagnostic accuracy results according to tumor grade found SSTR-PET/CT associated with higher sensitivity than  $^{18}\text{F}$ FDG PET/CT for all tumor grades, though the difference in sensitivity between SSTR-PET/CT and  $^{18}\text{F}$ FDG PET/CT was most pronounced for grade 1 GEP NETs (100% vs. 17%) and less pronounced for grade 2 (91% vs. 43%) and grade 3 (92% vs. 51%).<sup>28</sup> One other study reported tumor grade but did not analyze results stratified according to grade.<sup>35</sup>

Ki-67 is an established marker of cell proliferation that is used to grade NETs,<sup>41</sup> but no study stratified diagnostic accuracy results according to Ki-67 index levels. Only one study<sup>24</sup> reported the proportion of patients within different Ki-67 categories. In this study, about 90% of patients who could be categorized were low or intermediate; however, approximately one third of patients were missing Ki-67 information.

As described above, one study found that SSTR-PET/CT was associated with higher sensitivity than  $^{18}\text{F}$ FDG PET/CT for typical pulmonary carcinoids (91% vs. 35%,  $p < 0.001$ ) but worse sensitivity for atypical carcinoids (50% vs. 100%,  $p = 0.04$ ).<sup>30</sup> No other study in Key Question 1 stratified diagnostic accuracy results according to NET tumor type.

Diagnostic accuracy of SSTR-PET/CT may also vary according to tumor location, due to variability across organs in physiological uptake (e.g., higher in the liver and gut). In addition, the degree of SSTR expression may vary across sites (e.g., generally lower in pancreatic than in gastrointestinal tumors). One study found that sensitivity of SSTR-PET/CT was higher than for OctreoScan or CT/MRI for detection of unknown primary or metastatic NETs across when tumors were stratified according to site (pancreas, liver, bowel, abdominal and retroperitoneal lymph nodes, bone), with the exception of lung and mediastinal NETs, for which SSTR-PET/CT and CT/MRI performed similarly (**Table 4a**).<sup>33</sup> For evaluation of metastatic lesions, two studies found that accuracy of SSTR-PET/CT was similar in analyses stratified according to site of metastasis (**Table 4c**).<sup>34,36</sup> Across the studies included in Key Question 1, there was insufficient evidence to determine whether diagnostic accuracy differed according to NET tumor site, due to small numbers of studies for each comparison, imprecise estimates, and methodological shortcomings in the studies.

## Key Question 2. What is the predictive utility of SSTR-PET compared with OctreoScan, <sup>18</sup>FDG-PET, and/or CT/MRI for predicting response to PRRT or somatostatin analogue therapy?

No study compared the utility of SSTR-PET versus OctreoScan, <sup>18</sup>FDG-PET, or CT/MRI for predicting response to PRRT or somatostatin analogue therapy. However, two studies evaluated the utility of SSTR-PET, without a comparison to other imaging modalities, for predicting response to PRRT or somatostatin analogue therapy.<sup>42,43</sup> One study found that among patients with well-differentiated NETs of the ileum treated with octreotide, the degree of

radiotracer uptake (based on the lesion with highest uptake) as measured using SUVs (standardized uptake values) was associated with duration of progression-free survival.<sup>42</sup> A cutoff for the SUVmax of 29.4 and for the SUVmean of 20.3 separated between patients with a long progression-free survival (69 weeks) and short progression-free survival (26 weeks). In a multivariate Cox regression with backward stepwise model, SUV was the only significant predictor for progression-free survival (gender distribution, presence of primary tumor, and location of metastases were not predictive). However, the predictive accuracy was poor (sensitivity 75%, specificity 64%). Another study of patients with metastatic NET found an SUVmax greater than 16.4 associated with sensitivity of 95% and specificity of 60% for predicting response to PRRT.<sup>43</sup>

### Key Question 2a. How does predictive utility vary according to patient or tumor characteristics?

No study evaluated how predictive utility varies according to patient or tumor characteristics.

### Key Question 3. What are the effects of SSTR-PET imaging compared with OctreoScan, <sup>18</sup>FDG-PET, and/or CT/MRI on clinical decision-making?

Six studies addressed the effects of SSTR-PET on change in treatment management compared with imaging without SSTR-PET (**Table 4d**). Three studies were conducted in the United States,<sup>24,33,44</sup> two in Germany,<sup>26,45</sup> and one each in Belgium<sup>36</sup> and Austria.<sup>27</sup> Sample sizes



ranged from 21 to 131. Patients were enrolled with metastatic NETs,<sup>36</sup> MEN syndrome,<sup>26,44</sup> suspected or known GEP NETs,<sup>33</sup> proven NETs,<sup>24,45</sup> or a combination of suspected NETs, proven NETS, and metastatic NETs.<sup>27</sup> SSTR-PET or –PET/CT were compared with OctreoScan in four studies,<sup>24,33,36,44</sup> CT in five studies,<sup>26,27,33,44,45</sup> and MRI in three studies.<sup>33,44,45</sup>

The proportion of patients who had a change in management due to the SSTR-PET/CT ranged from as 13%<sup>36</sup> to 60%,<sup>45</sup> with most studies reporting over 30%.<sup>24,26,33,44,45</sup> The type of change reported in the studies included additional surgical resection, cancellation of surgery, additional indication for surgery, and additional pharmacotherapy.

All studies had methodological shortcomings (**Table 6b**). Importantly, none of the studies clearly pre-defined “change in clinical decision-making” or reported use of a formal protocol or treatment algorithm to determine responses to SSTR-PET findings. No study reported attrition, no study included a comparison group of patients who underwent SSTR-PET without the alternative imaging modality, and the studies were not designed to adjust for potential confounders. Only three of the studies reported that they enrolled consecutive patients,<sup>24,27,45</sup> and two studies did not blind the outcome assessor.<sup>44,45</sup>

### Key Question 3a. How do effects on clinical decision-making vary according to patient or tumor characteristics?

There was insufficient evidence to determine how effects of SSTR-PET on decision-making vary according to patient or tumor characteristics.

## DISCUSSION

The main findings of this review are summarized in **Appendix 7**. SSTR-PET was associated with greater sensitivity than OctreoScan (difference in sensitivity ranged from 14% to 56%) and  $^{18}\text{F}$ FDG-PET (difference in sensitivity ranged from 24% to 75%) for diagnosis of NETs. Findings were generally consistent for diagnosis of pulmonary NETs, GEP NETs, or both, as well as for primary and metastatic lesions. SSTR-PET was also associated with higher sensitivity for identification of primary NET than CT/MRI (differences in sensitivity ranged from 12% to 49%). For metastatic lesions, three studies reported inconsistent findings, with some studies finding no clear differences between SSTR-PET and MRI, or MRI associated with slightly higher sensitivity. Most studies reported no clear differences in specificity between SSTR-PET and alternative imaging modalities.

Evidence on how comparative diagnostic accuracy varies according to tumor characteristics is limited. One study found no clear effects of tumor grade on diagnostic accuracy differences between SSTR-PET/CT versus  $^{18}\text{F}$ FDG-PET/CT<sup>28</sup> and one study found SSTR-PET more accurate than  $^{18}\text{F}$ FDG-PET/CT for diagnosis of typical carcinoids, but an opposite pattern for atypical carcinoids.<sup>30</sup> Studies reported no clear differences in comparative diagnostic accuracy when analyses were stratified according to metastasis site or to tumor location; a possible exception was pulmonary lesions, for which one study found that SSTR-PET and CT/MRI performed similarly.<sup>33</sup>

No study compared the utility of SSTR-PET versus alternative imaging modalities for predicting response to PRRT or somatostatin analogue therapy. Although two studies of SSTR-PET found the degree of radiotracer uptake (as measured by SUV) associated with the likelihood

of treatment response, diagnostic accuracy was suboptimal.<sup>42,43</sup> In particular, specificity for predicting response to treatment was low (60% to 65%).

Although five studies found that SSTR-PET was associated with changes in management in a substantial proportion of patients, the studies had important methodological limitations. In particular, the studies did not pre-define “changes in management” or report use of standardized protocols to guide management decisions in response to SSTR-PET imaging findings, and no study included a comparison group of patients who underwent SSTR-PET without alternative imaging. No study was designed to assess clinical outcomes associated with use of SSTR-PET.

Limitations of this review include the relatively small number of studies available for specific imaging comparisons and types of NETs, the lack of evidence on how patient and tumor characteristics impact diagnostic accuracy, and methodological limitations in the studies, including suboptimal and heterogeneous reference standards and use of a case-control design in a number of studies. Most studies appeared to evaluate accuracy for diagnosis of more well-differentiated/indolent NETs, though details about tumor grade and type were relatively limited. Most studies reported results based on per-lesion analyses, which may not be as clinically relevant as per-patient analyses. Per-lesion analyses may also result in higher precision of estimates than warranted, since one patient may have many lesions. Some studies were not designed to or failed to report specificity, providing incomplete information regarding diagnostic accuracy. Due to the heterogeneity among studies, we did not attempt meta-analysis. We focused on standard radiotracers for SSTR-PET (<sup>68</sup>Ga-DOTATATE and <sup>68</sup>Ga-DOTATOC) and octreotide SPECT/CT (<sup>111</sup>In-DTPA), although other radiotracers have been investigated.

Research that focuses on comparative diagnostic accuracy in persons with high-grade or poorly differentiated NETs would be helpful for better understanding the usefulness and potential limitations of SSTR-PET for diagnosis. One study found that SSTR-PET/MRI performed better than SSTR-PET/CT for detection of metastatic disease;<sup>35</sup> more research would be useful for understanding the comparative performance of these two modalities. Research is also needed to understand the predictive utility of SSTR-PET for guiding decisions regarding use of PRRT and somatostatin analogue therapy. Future studies on effects of SSTR-PET should utilize pre-defined protocols or algorithms to guide clinical decisions, clearly define “treatment changes,” and compare decision-making among groups who undergo alternative imaging protocols.

# REFERENCES

1. Zacharof AK. Gastrointestinal neuroendocrine tumors. *Ann Gastroenterol*. 2003; 16(1):34-9.
2. Klimstra DS, Modlin IR, Coppola D, et al. The pathologic classification of neuroendocrine tumors: a review of nomenclature, grading, and staging systems. *Pancreas*. 2010; 39(6):707-12. doi: 10.1097/MPA.0b013e3181ec124e. PMID: 20664470.
3. Kunz PL. Carcinoid and neuroendocrine tumors: building on success. *J Clin Oncol*. 2015; 33(16):1855-63. doi: 10.1200/jco.2014.60.2532. PMID: 25918282.
4. Bison SM, Konijnenberg MW, Melis M, et al. Peptide receptor radionuclide therapy using radiolabeled somatostatin analogs: focus on future developments. *Clin Transl Imaging*. 2014; 2(1):55-66. doi: 10.1007/s40336-014-0054-2. PMID: PMC3991004.
5. de Herder WW, Kwekkeboom DJ, Feelders RA, et al. Somatostatin receptor imaging for neuroendocrine tumors. *Pituitary*. 2006; 9(3):243-8. doi: 10.1007/s11102-006-0270-5. PMID: 17001462.
6. Heller MT, Shah AB. Imaging of neuroendocrine tumors. *Radiol Clin North Am*. 2011; 49(3):529-48. doi: <http://dx.doi.org/10.1016/j.rcl.2011.02.011>.
7. Kwekkeboom DJ, Krenning EP. Somatostatin receptor imaging. *Semin Nucl Med*. 2002; 32(2):84-91. doi: 10.1053/snuc.2002.31022. PMID: 11965603.
8. Rufini V, Calcagni ML, Baum RP. Imaging of neuroendocrine tumors. *Semin Nucl Med*. 2006; 36(3):228-47. PMID: 16762613.
9. Shi W, Johnston CF, Buchanan KD, et al. Localization of neuroendocrine tumours with [<sup>111</sup>In] DTPA-octreotide scintigraphy (Octreoscan): a comparative study with CT and MR imaging. *QJM*. 1998; 91(4):295-301. PMID: 9666953.
10. Krausz Y, Keidar Z, Kogan I, et al. SPECT/CT hybrid imaging with <sup>111</sup>In-pentetreotide in assessment of neuroendocrine tumours. *Clin Endocrinol (Oxf)*. 2003; 59(5):565-73. PMID: 14616879.
11. Breeman WAP, de Blois E, Sze Chan H, et al. <sup>68</sup>Ga-labeled DOTA-peptides and <sup>68</sup>Ga-labeled radiopharmaceuticals for positron emission tomography: current status of research, clinical applications, and future perspectives. *Semin Nucl Med*. 2011; 41(4):314-21. doi: <http://dx.doi.org/10.1053/j.semnuclmed.2011.02.001>. PMID: 21624565
12. Mojtahedi A, Thamake S, Tworowska I, et al. The value of (<sup>68</sup>Ga)-DOTATATE PET/CT in diagnosis and management of neuroendocrine tumors compared to current FDA approved imaging modalities: a review of literature. *Am J Nucl Med Mol Imaging*. 2014; 4(5):426-34. PMID: PMC4138137.
13. Geijer H, Breimer LH. Somatostatin receptor PET/CT in neuroendocrine tumours: update on systematic review and meta-analysis. *Eur J Nucl Med Mol Imaging*. 2013; 40(11):1770-80. doi: <http://dx.doi.org/10.1007/s00259-013-2482-z>. PMID: 23873003.
14. Yang J, Kan Y, Ge BH, et al. Diagnostic role of Gallium-68 DOTATOC and Gallium-68 DOTATATE PET in patients with neuroendocrine tumors: a meta-analysis. *Acta Radiol*. 2014; 55(4):389-98. doi: <http://dx.doi.org/10.1177/0284185113496679>. PMID: 23928010.
15. Shea BJ, Bouter LM, Peterson J, et al. External validation of a measurement tool to assess systematic reviews (AMSTAR). *PLoS One*. 2007; 2(12):e1350. doi: 10.1371/journal.pone.0001350. PMID: 18159233.
16. Shea BJ, Grimshaw JM, Wells GA, et al. Development of AMSTAR: a measurement tool to assess the methodological quality of systematic reviews. *BMC Med Res Methodol*. 2007; 7:10. doi: 10.1186/1471-2288-7-10. PMID: 17302989.
17. Shea BJ, Hamel C, Wells GA, et al. AMSTAR is a reliable and valid measurement tool to assess the methodological quality of systematic reviews. *J Clin Epidemiol*. 2009; 62(10):1013-20. doi: 10.1016/j.jclinepi.2008.10.009. PMID: 19230606.
18. U.S. Preventive Services Task Force. U.S. Preventive Services Task Force Procedure

- Manual. 2015.  
<https://www.uspreventiveservicestaskforce.org/Page/Name/methods-and-processes>  
 Accessed April 11, 2017.
19. Whiting PF, Rutjes AW, Westwood ME, et al. QUADAS-2: a revised tool for the quality assessment of diagnostic accuracy studies. *Ann Intern Med.* 2011; 155(8):529-36. doi: 10.7326/0003-4819-155-8-201110180-00009. PMID: 22007046.
  20. Atkins D, Best D, Briss PA, et al. Grading quality of evidence and strength of recommendations. *BMJ.* 2004; 328(7454):1490. doi: 10.1136/bmj.328.7454.1490. PMID: 15205295.
  21. Agency for Healthcare Research Quality. Methods guide for effectiveness and comparative effectiveness reviews. 2014; AHRQ Publication No. 10(14)-EHC063-EF.
  22. Singh S, Chang SM, Matchar DB, et al. Chapter 7: grading a body of evidence on diagnostic tests. *J Gen Intern Med.* 2012; 27 Suppl 1:S47-55. doi: 10.1007/s11606-012-2021-9. PMID: 22648675.
  23. Schunemann HJ, Oxman AD, Brozek J, et al. Grading quality of evidence and strength of recommendations for diagnostic tests and strategies. *BMJ.* 2008; 336(7653):1106-10. doi: 10.1136/bmj.39500.677199.AE. PMID: 18483053.
  24. Deppen SA, Liu E, Blume JD, et al. Safety and efficacy of 68Ga-DOTATATE PET/CT for diagnosis, staging, and treatment management of neuroendocrine tumors. *J Nucl Med.* 2016; 57(5):708-14. doi: 10.2967/jnumed.115.163865. PMID: 26769865.
  25. Etchebehere EC, de Oliveira Santos A, Gumz B, et al. 68Ga-DOTATATE PET/CT, 99mTc-HYNIC-octreotide SPECT/CT, and whole-body MR imaging in detection of neuroendocrine tumors: a prospective trial. *J Nucl Med.* 2014; 55(10):1598-604. doi: 10.2967/jnumed.114.144543. PMID: 25168627.
  26. Froeling V, Elgeti F, Maurer MH, et al. Impact of Ga-68 DOTATOC PET/CT on the diagnosis and treatment of patients with multiple endocrine neoplasia. *Ann Nucl Med.* 2012; 26(9):738-43. doi: 10.1007/s12149-012-0634-z. PMID: 22865406
  27. Gabriel M, Decristoforo C, Kendler D, et al. 68Ga-DOTA-Tyr3-octreotide PET in neuroendocrine tumors: comparison with somatostatin receptor scintigraphy and CT. *J Nucl Med.* 2007; 48(4):508-18. PMID: 17401086.
  28. Has Simsek D, Kuyumcu S, Turkmen C, et al. Can complementary 68Ga-DOTATATE and 18F-FDG PET/CT establish the missing link between histopathology and therapeutic approach in gastroenteropancreatic neuroendocrine tumors? *J Nucl Med.* 2014; 55(11):1811-7. doi: 10.2967/jnumed.114.142224. PMID: 25315243.
  29. Kumar R, Sharma P, Garg P, et al. Role of 68Ga-DOTATOC PET-CT in the diagnosis and staging of pancreatic neuroendocrine tumours. *Eur Radiol.* 2011; 21(11):2408. doi: 10.1007/s00330-011-2199-y. PMID: 21750886.
  30. Lococo F, Perotti G, Cardillo G, et al. Multicenter comparison of 18F-FDG and 68Ga-DOTA-peptide PET/CT for pulmonary carcinoid. *Clin Nucl Med.* 2015; 40(3):e183-9. doi: 10.1097/rlu.0000000000000641. PMID: 25608152.
  31. Morgat C, Velayoudom-Cephise FL, Schwartz P, et al. Evaluation of 68 Ga-DOTA-TOC PET/CT for the detection of duodenopancreatic neuroendocrine tumors in patients with MEN1. *Eur J Nucl Med Mol Imaging.* 2016; 43(7):1258-66. PMID: 26819103.
  32. Putzer D, Gabriel M, Henninger B, et al. Bone metastases in patients with neuroendocrine tumor: 68Ga-DOTA-Tyr3-octreotide PET in comparison to CT and bone scintigraphy. *J Nucl Med.* 2009; 50(8):1214-21. doi: 10.2967/jnumed.108.060236. PMID: 19617343.
  33. Sadowski SM, Neychev V, Millo C, et al. Prospective study of 68Ga-DOTATATE positron emission tomography/computed tomography for detecting gastro-entero-pancreatic neuroendocrine tumors and unknown primary sites. *J Clin Oncol.* 2016; 34(6):588-96. doi: <http://dx.doi.org/10.1200/JCO.2015.64.0987> . PMID: 26712231.
  34. Schraml C, Schwenzer NF, Sperling O, et al. Staging of neuroendocrine tumours: comparison of [(68)Ga]DOTATOC multiphase PET/CT and whole-body MRI. *Cancer Imaging.* 2013; 13(1):63-72. doi: 10.1102/1470-7330.2013.0007. PMID: PMC3589947.

35. Schreiter NF, Nogami M, Steffen I, et al. Evaluation of the potential of PET-MRI fusion for detection of liver metastases in patients with neuroendocrine tumours. *Eur Radiol.* 2012; 22(2):458-67. doi: 10.1007/s00330-011-2266-4. PMID: 21904802.
36. Van Binnebeek S, Vanbilloen B, Baete K, et al. Comparison of diagnostic accuracy of (111)In-pentetreotide SPECT and (68)Ga-DOTATOC PET/CT: A lesion-by-lesion analysis in patients with metastatic neuroendocrine tumours. *Eur Radiol.* 2016; 26(3):900-9. doi: <http://dx.doi.org/10.1007/s00330-015-3882-1>. PMID: 26162577.
37. Venkitaraman B, Karunanithi S, Kumar A, et al. Role of 68Ga-DOTATOC PET/CT in initial evaluation of patients with suspected bronchopulmonary carcinoid. *Eur J Nucl Med Mol Imaging.* 2014; 41(5):856-64. doi: 10.1007/s00259-013-2659-5. PMID: 24435773.
38. Versari A, Camellini L, Carlinfante G, et al. Ga-68 DOTATOC PET, endoscopic ultrasonography, and multidetector CT in the diagnosis of duodenopancreatic neuroendocrine tumors: a single-centre retrospective study. *Clin Nucl Med.* 2010; 35(5):321-8. doi: 10.1097/RLU.0b013e3181d6677c. PMID: 20395703.
39. Arora S, Geppert CM, Kalishman S, et al. Academic health center management of chronic diseases through knowledge networks: Project ECHO. *Acad Med.* 2007; 82(2):154-60. doi: 10.1097/ACM.0b013e31802d8f68. PMID: 17264693.
40. Garcia-Carbonero R, Garcia-Figueiras R, Carmona-Bayonas A, et al. Imaging approaches to assess the therapeutic response of gastroenteropancreatic neuroendocrine tumors (GEP-NETs): current perspectives and future trends of an exciting field in development. *Cancer Metastasis Rev.* 2015; 34(4):823-42. doi: 10.1007/s10555-015-9598-5. PMID: 26433592.
41. Nadler A, Cukier M, Rowsell C, et al. Ki-67 is a reliable pathological grading marker for neuroendocrine tumors. *Virchows Arch.* 2013; 462(5):501-5. doi: 10.1007/s00428-013-1410-8. PMID: 23588555.
42. Koch W, Auernhammer CJ, Geisler J, et al. Treatment with octreotide in patients with well-differentiated neuroendocrine tumors of the ileum: prognostic stratification with Ga-68-DOTA-TATE positron emission tomography. *Mol Imaging.* 2014; 13:1-10. PMID: 24824963.
43. Kratochwil C, Stefanova M, Mavriopoulou E, et al. SUV of [68Ga]DOTATOC-PET/CT predicts response probability of PRRT in neuroendocrine tumors. *Mol Imaging Biol.* 2014; 17(3):313-8. doi: <http://dx.doi.org/10.1007/s11307-014-0795-3>. PMID: 25319765.
44. Sadowski SM, Millo C, Cottle-Delisle C, et al. Results of (68)Gallium-DOTATATE PET/CT scanning in patients with multiple endocrine neoplasia type 1. *J Am Coll Surg.* 2015; 221(2):509-17. doi: <http://dx.doi.org/10.1016/j.jamcollsurg.2015.04.005>. PMID: 26206648.
45. Frilling A, Sotiropoulos GC, Radtke A, et al. The impact of 68Ga-DOTATOC positron emission tomography/computed tomography on the multimodal management of patients with neuroendocrine tumors. *Ann Surg.* 2010; 252(5):850-6. doi: 10.1097/SLA.0b013e3181fd37e8. PMID: 21037441.

## Appendix 1. Table of Systematic Reviews

| Author, Year | Purpose of Study                                                                                                                                                     | Databases Searched<br>Date of Last Search       | Number of<br>Included<br>Studies | Types of Studies Included/<br>Limitations of Primary Studies                                                                                                              | Language<br>Restrictions |
|--------------|----------------------------------------------------------------------------------------------------------------------------------------------------------------------|-------------------------------------------------|----------------------------------|---------------------------------------------------------------------------------------------------------------------------------------------------------------------------|--------------------------|
| Geijer, 2013 | To evaluate the diagnostic quality of SMSR PET and perform a meta-analysis as an update of a previous study (Treglia, 2012).                                         | Pubmed/MEDLINE and Embase through December 2012 | 22                               | Diagnostic accuracy studies; studies were often in highly selected populations and many in patients with known tumors, so false-positive results could not be determined. | None                     |
| Yang, 2014   | To systematically review and perform a meta-analysis of published data regarding the diagnostic role of 68Ga-DATATOC and 68Ga-DOTATATE PET in the diagnosis of NETs. | Pubmed, Embase, and Scopus through April 2013   | 10                               | Diagnostic accuracy studies; studies were rated as moderate-high quality, but specific details about limitations were NR.                                                 | None                     |



## Appendix 1. Table of Systematic Reviews

| Author, Year | Methods for Rating Methodological Quality of Primary Studies | Methods for Synthesizing Results of Primary Studies                                                                                                 | Number of Patients | Tracer and Imaging Scan Evaluated                                                                                                                 | Reference Standard                                                                       |
|--------------|--------------------------------------------------------------|-----------------------------------------------------------------------------------------------------------------------------------------------------|--------------------|---------------------------------------------------------------------------------------------------------------------------------------------------|------------------------------------------------------------------------------------------|
| Geijer, 2013 | QUADAS-2                                                     | Pooled all studies, conducted meta-analysis, and reported sensitivity and specificity with 95% CIs                                                  | 2,105 total        | 68Ga-DOTATOC PET or PET/CT (11 studies)<br>68Ga-DOTATATE PET/CT (7 studies)<br>68Ga-Da-DOTANOC PET/CT (3 studies)<br>68Cu-DOTATE PET/CT (1 study) | Histology with or without clinical/imaging follow-up, biopsy, laboratory analysis, or CT |
| Yang, 2014   | QUADAS                                                       | Pooled studies separately by tracer (68Ga-DOTATOC or 68Ga-DOTATATE), conducted meta-analyses, and reported sensitivity and specificity with 95% CIs | 416 total          | 68Ga-DOTATOC PET or PET/CT (6 studies)<br>68Ga-DOTATATE PET/CT (4 studies)                                                                        | Histology with or without follow-up                                                      |

## Appendix 1. Table of Systematic Reviews

| Author, Year | Results                                                                                                                                                                                                                                                | Adverse Events |
|--------------|--------------------------------------------------------------------------------------------------------------------------------------------------------------------------------------------------------------------------------------------------------|----------------|
| Geijer, 2013 | Pooled sensitivity (95% CI): 93% (91 to 94); range: 70% to 100%, I-square: 72%<br>Pooled specificity: 96% (95 to 98); range: 67% to 100%<br>Area under SROC 0.98 (0.95 to 1.0), I-square: 68%                                                          | Not reported   |
| Yang, 2014   | <b>68Ga-DOTATOC vs. 68Ga-DOTATATE</b><br>Pooled sensitivity (95% CI): 93% (89 to 96) vs. 96% (91 to 99), I-square: 80.9% vs. 60.5%<br>Pooled specificity (95% CI): 85% (74 to 93) vs. 100% (82 to 100), I-square: 56.8% vs. 0%<br>AUROC: 0.96 vs. 0.98 | Not reported   |

Abbreviations: CI=confidence interval; NET= neuroendocrine tumor; QUADAS=quality assessment of diagnostic accuracy studies; PET= positron emission tomography.

## Appendix 2. Search Strategies

Database: Ovid MEDLINE(R) without Revisions <1996 to November Week 2 2016>

Search Strategy:

- 
- 1 exp Somatostatin/ (7384)
  - 2 Receptors, Somatostatin/ (3380)
  - 3 (somatostatin receptors or SSTR).mp. (1904)
  - 4 Positron-Emission Tomography/ (41516)
  - 5 PET.ti,ab. (54583)
  - 6 exp Tomography, X-Ray Computed/ (261479)
  - 7 (DOTATOC or DOTATATE).mp. [mp=title, abstract, original title, name of substance word, subject heading word, keyword heading word, protocol supplementary concept word, rare disease supplementary concept word, unique identifier] (602)
  - 8 exp Neuroendocrine Tumors/ (82976)
  - 9 neuroendocrine.mp. (29160)
  - 10 or/1-3 (9788)
  - 11 or/4-7 (310902)
  - 12 8 or 9 (101994)
  - 13 and/10-12 (482)

Database: Ovid MEDLINE(R) without Revisions <1996 to November Week 2 2016>

Search Strategy:

- 
- 1 exp Somatostatin/ (7384)
  - 2 Receptors, Somatostatin/ (3380)
  - 3 (somatostatin receptors or SSTR).mp. (1904)
  - 4 Positron-Emission Tomography/ (41516)
  - 5 PET.ti,ab. (54583)
  - 6 exp Tomography, X-Ray Computed/ (261479)
  - 7 (DOTATOC or DOTATATE).mp. [mp=title, abstract, original title, name of substance word, subject heading word, keyword heading word, protocol supplementary concept word, rare disease supplementary concept word, unique identifier] (602)
  - 8 exp Neuroendocrine Tumors/ (82976)
  - 9 neuroendocrine.mp. (29160)
  - 10 or/1-3 (9788)
  - 11 or/4-7 (310902)
  - 12 8 or 9 (101994)
  - 13 and/10-12 (482)
  - 14 octreoscan.mp. (308)
  - 15 fdg-pet.mp. (14936)
  - 16 CT MRI.mp. (2581)
  - 17 14 or 15 or 16 (17578)
  - 18 12 and 17 (1031)
  - 19 18 not 13 (934)

## Appendix 2. Search Strategies

Database: EBM Reviews - Cochrane Central Register of Controlled Trials <October 2016>

Search Strategy:

- 
- 1 exp Somatostatin/ (536)
  - 2 Receptors, Somatostatin/ (32)
  - 3 (somatostatin receptors or SSTR).mp. (59)
  - 4 Positron-Emission Tomography/ (789)
  - 5 PET.ti,ab. (2435)
  - 6 exp Tomography, X-Ray Computed/ (3949)
  - 7 (DOTATOC or DOTATATE).mp. [mp=title, original title, abstract, mesh headings, heading words, keyword] (28)
  - 8 exp Neuroendocrine Tumors/ (1267)
  - 9 neuroendocrine.mp. (1405)
  - 10 or/1-3 (600)
  - 11 or/4-7 (6408)
  - 12 8 or 9 (2598)
  - 13 and/10-12 (11)
  - 14 octreoscan.mp. (8)
  - 15 fdg-pet.mp. (729)
  - 16 CT MRI.mp. (292)
  - 17 14 or 15 or 16 (1004)
  - 18 12 and 17 (25)
  - 19 13 or 18 (33)

Database: EBM Reviews - Cochrane Database of Systematic Reviews <2005 to November 16, 2016>

Search Strategy:

- 
- 1 somatostatin.mp. [mp=title, short title, abstract, full text, keywords, caption text] (45)
  - 2 SSTR.mp. [mp=title, short title, abstract, full text, keywords, caption text] (1)
  - 3 PET.ti,ab. (19)
  - 4 (DOTATOC or DOTATATE).mp. [mp=title, short title, abstract, full text, keywords, caption text] (1)
  - 5 octreoscan.mp. [mp=title, short title, abstract, full text, keywords, caption text] (2)
  - 6 fdg pet.mp. [mp=title, short title, abstract, full text, keywords, caption text] (30)
  - 7 ct mri.mp. [mp=title, short title, abstract, full text, keywords, caption text] (95)
  - 8 or/1-7 (165)
  - 9 8 and neuroendocrine.mp. [mp=title, short title, abstract, full text, keywords, caption text] (8)

## Appendix 3. Literature Flow Diagram

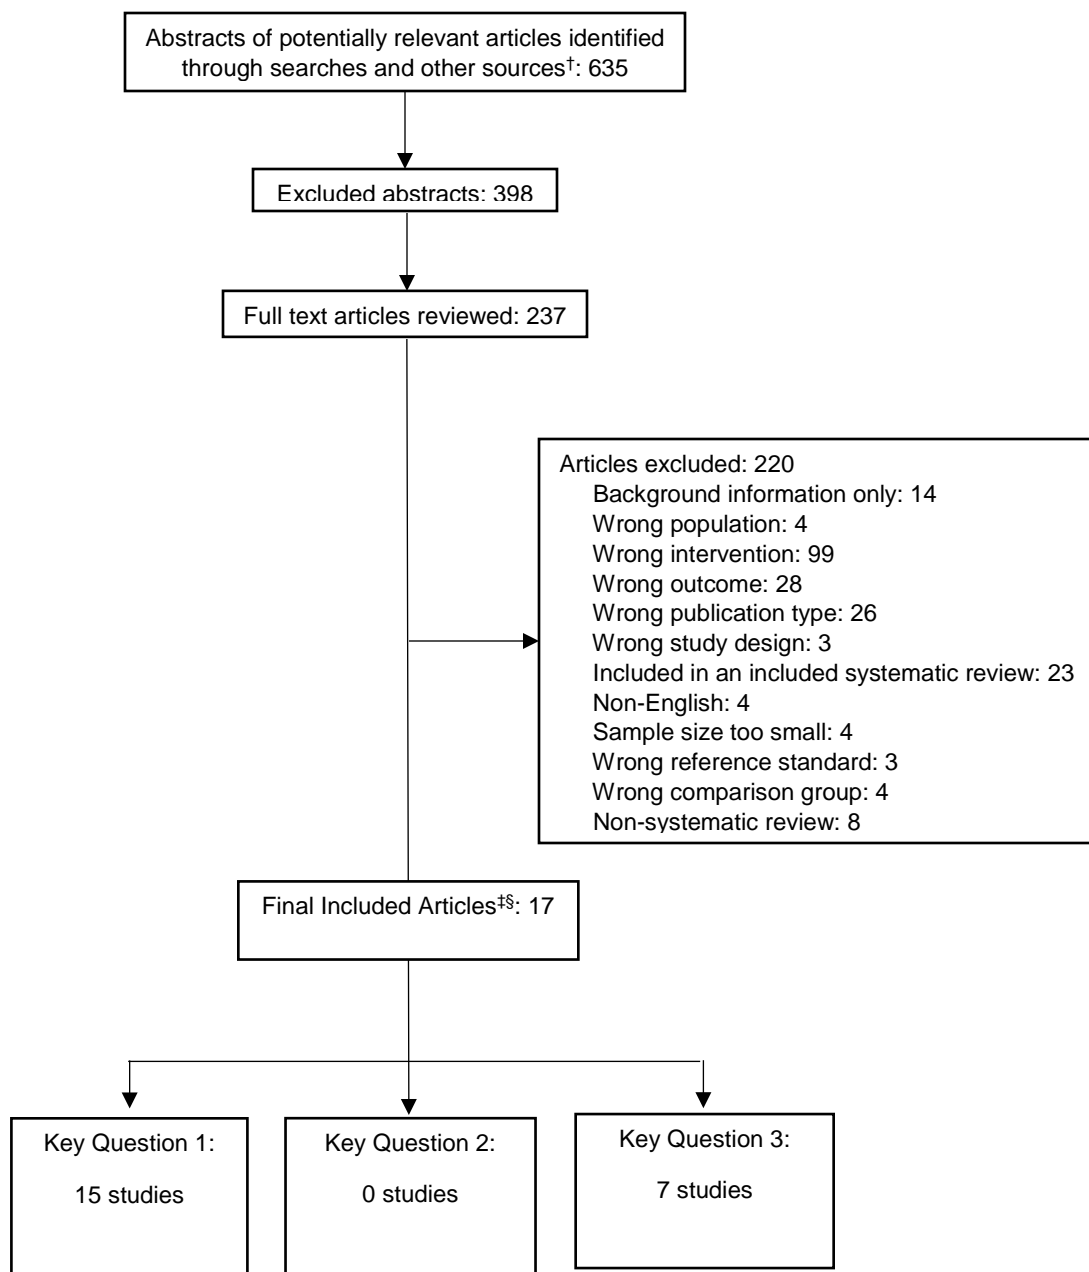

<sup>†</sup>Identified from reference lists, hand searching, suggested by experts, etc.

<sup>‡</sup>Studies that provided data and contributed to the body of evidence were considered 'included'

<sup>§</sup>Studies may contribute data to more than one key question

## **Appendix 4. Evidence Tables**

**Table 4a. Studies of Diagnostic Accuracy of SSTR-PET for Identification of NETs**

| <b>Author, year<br/>Quality</b>    | <b>Tracer</b>                   | <b>Imaging Test</b> | <b>Definition of a Positive Test</b> | <b>Reference Standard</b>                                                                 | <b>Type of Study</b>        | <b>Country<br/>Setting</b> |
|------------------------------------|---------------------------------|---------------------|--------------------------------------|-------------------------------------------------------------------------------------------|-----------------------------|----------------------------|
| Deppen, 2016 <sup>24</sup><br>Fair | <sup>68</sup> Ga-DOTATATE       | PET/CT              | Unclear                              | Single or multiple CT or MRI scans, surgical tissue confirmation, or combination thereof. | Prospective cross-sectional | USA                        |
| Deppen, 2016 <sup>24</sup><br>Fair | <sup>111</sup> In-Pentetreotide | SPECT or SPECT/CT   | Unclear                              | Same as above                                                                             | Same as above               | Same as above              |
| Deppen, 2016 <sup>24</sup><br>Fair | <sup>68</sup> Ga-DOTATATE       | PET/CT              | Unclear                              | Same as above                                                                             | Same as above               | Same as above              |
| Deppen, 2016 <sup>24</sup><br>Fair | <sup>111</sup> In-Pentetreotide | SPECT/CT            | Unclear                              | Same as above                                                                             | Same as above               | Same as above              |

**Table 4a. Studies of Diagnostic Accuracy of SSTR-PET for Identification of NETs**

| Author, year<br>Quality            | Inclusion Criteria                                                                                                                                                                                                                                                                                                                                                                          | Population Characteristics                                                                                                                                                                                                                                                                                     | Sample Size<br>Proportion<br>With Condition | Analysis Method                                                                                        | TP | FP | FN | TN | Reported<br>Sensitivity<br>(95% CI) |
|------------------------------------|---------------------------------------------------------------------------------------------------------------------------------------------------------------------------------------------------------------------------------------------------------------------------------------------------------------------------------------------------------------------------------------------|----------------------------------------------------------------------------------------------------------------------------------------------------------------------------------------------------------------------------------------------------------------------------------------------------------------|---------------------------------------------|--------------------------------------------------------------------------------------------------------|----|----|----|----|-------------------------------------|
| Deppen, 2016 <sup>24</sup><br>Fair | Enrolled patients having a proven diagnosis of NET, prospective analysis of safety and toxicity data and <sup>68</sup> Ga-DOTATATE scan findings. Patients were excluded if no prior <sup>111</sup> In-Pentetreotide was available, time between scans exceeded 3 years, no <sup>111</sup> In-Pentetreotide scan available after a major surgical intervention occurring between the scans. | Age (mean, years): 53.7 (SD 11)<br>Female: 58%<br>NET type:<br>-Midgut carcinoid: 45%<br>-Gastroenteropancreatic: 23%<br>-Unknown primary: 12%<br>-Symptoms only: 7%<br>-Pulmonary: 7%<br>-Hindgut or rectal: 3%<br>-Other: 2%<br>Ki-67 category:<br>-Low: 24<br>-Intermediate: 37<br>-High: 6<br>-Missing: 30 | N=97<br>100%                                | Detection of cancer or progression, all types, per-patient analysis                                    | 48 | 2  | 2  | 26 | 96% (86 to 100)                     |
| Deppen, 2016 <sup>24</sup><br>Fair | Same as above                                                                                                                                                                                                                                                                                                                                                                               | Same as above                                                                                                                                                                                                                                                                                                  | Same as above                               | Detection of cancer or progression, all types, per-patient analysis                                    | 36 | 2  | 14 | 26 | 72% (58 to 75)                      |
| Deppen, 2016 <sup>24</sup><br>Fair | Same as above                                                                                                                                                                                                                                                                                                                                                                               | NR for subgroup                                                                                                                                                                                                                                                                                                | N=50<br>100%                                | Detection of cancer or progression, all types, per-patient analysis, only those who underwent SPECT/CT | 28 | 1  | 1  | 18 | 97% (82 to 100)                     |
| Deppen, 2016 <sup>24</sup><br>Fair | Same as above                                                                                                                                                                                                                                                                                                                                                                               | Same as above                                                                                                                                                                                                                                                                                                  | Same as above                               | Detection of cancer or progression, all types, per-patient analysis, only those who underwent SPECT/CT | 24 | 1  | 5  | 18 | 83% (64 to 94)                      |



**Table 4a. Studies of Diagnostic Accuracy of SSTR-PET for Identification of NETs**

| <b>Author, year<br/>Quality</b>    | <b>Calculated<br/>Sensitivity<br/>(95% CI)</b> | <b>Reported<br/>Specificity<br/>(95% CI)</b> | <b>Calculated<br/>Specificity<br/>(95% CI)</b> | <b>Reported PPV<br/>(95% CI)</b> | <b>Calculated PPV<br/>(95% CI)</b> | <b>Reported NPV<br/>(95% CI)</b> | <b>Calculated NPV<br/>(95% CI)</b> |
|------------------------------------|------------------------------------------------|----------------------------------------------|------------------------------------------------|----------------------------------|------------------------------------|----------------------------------|------------------------------------|
| Deppen, 2016 <sup>24</sup><br>Fair | 96% (86.29 to 99.51)                           | 93% (77 to 99)                               | 92.86% (76.50 to 99.12)                        | 96% (86 to 100)                  | 96% (86.31 to 98.92)               | 93% (77 to 99)                   | 92.86% (76.91 to 98.07)            |
| Deppen, 2016 <sup>24</sup><br>Fair | 72% (57.51 to 83.77)                           | 93% (77 to 99)                               | 92.86% (76.50 to 99.12)                        | 95% (82 to 99)                   | 94.74% (82.40 to 98.58)            | 65% (48 to 94)                   | 65% (54.06 to 74.56)               |
| Deppen, 2016 <sup>24</sup><br>Fair | 96.55% (82.24 to 99.91)                        | 93% (77 to 99)                               | 94.74% (73.97 to 99.87)                        | NR                               | 96.55% (80.58 to 99.47)            | NR                               | 94.74% (72.34 to 99.20)            |
| Deppen, 2016 <sup>24</sup><br>Fair | 82.76% (64.23 to 94.15)                        | 93% (77 to 99)                               | 94.74% (73.97 to 99.87)                        | NR                               | 96% (77.96 to 99.39)               | NR                               | 78.26% (61.69 to 88.95)            |

**Table 4a. Studies of Diagnostic Accuracy of SSTR-PET for Identification of NETs**

| <b>Author, year<br/>Quality</b>    | <b>Reported<br/>AUROC</b> | <b>Calculated PLR<br/>(95% CI)</b> | <b>Reported PLR<br/>(95% CI)</b> | <b>Calculated NLR<br/>(95% CI)</b> | <b>Reported NLR<br/>(95% CI)</b> | <b>Other<br/>Measures of<br/>Diagnostic<br/>Accuracy</b> | <b>Imaging<br/>Accuracy</b> |
|------------------------------------|---------------------------|------------------------------------|----------------------------------|------------------------------------|----------------------------------|----------------------------------------------------------|-----------------------------|
| Deppen, 2016 <sup>24</sup><br>Fair | NR                        | 13.44 (3.53 to<br>51.16)           | NR                               | 0.04 (0.01 to 0.17)                | NR                               | NR                                                       | 0.94 (0.89 to<br>1.00)      |
| Deppen, 2016 <sup>24</sup><br>Fair | NR                        | 10.08 (2.62 to<br>38.75)           | NR                               | 0.30 (0.19 to 0.48)                | NR                               | NR                                                       | 0.82 (0.74 to<br>0.90)      |
| Deppen, 2016 <sup>24</sup><br>Fair | NR                        | 18.34 (2.72 to<br>123.76)          | NR                               | 0.04 (0.01 to 0.25)                | NR                               | NR                                                       | NR                          |
| Deppen, 2016 <sup>24</sup><br>Fair | NR                        | 15.72 (2.32 to<br>106.71)          | NR                               | 0.18 (0.08 to 0.41)                | NR                               | NR                                                       | NR                          |

**Table 4a. Studies of Diagnostic Accuracy of SSTR-PET for Identification of NETs**

| <b>Author, year<br/>Quality</b>            | <b>Tracer</b>                                               | <b>Imaging Test</b> | <b>Definition of a Positive Test</b>                                                                                                                                                                                                                                            | <b>Reference Standard</b>                                                                                                                                        | <b>Type of Study</b>        | <b>Country<br/>Setting</b> |
|--------------------------------------------|-------------------------------------------------------------|---------------------|---------------------------------------------------------------------------------------------------------------------------------------------------------------------------------------------------------------------------------------------------------------------------------|------------------------------------------------------------------------------------------------------------------------------------------------------------------|-----------------------------|----------------------------|
| Etchebehere,<br>2014 <sup>25</sup><br>Fair | <sup>68</sup> Ga-DOTATATE                                   | PET/CT              | Intense focal uptake in comparison to the adjacent tissues was seen in the coronal, transaxial, and sagittal views.                                                                                                                                                             | Consensus among investigators at the end of the study evaluating all lesions by all methods, clinical follow-up, and biopsy of suggestive lesions when possible. | Prospective cross-sectional | Brazil<br>Setting: NR      |
| Etchebehere,<br>2014 <sup>25</sup><br>Fair | 111-185 MBq (3-5 mCi) of <sup>99m</sup> Tc-HYNIC-octreotide | SPECT/CT            | Intense focal uptake in comparison to the adjacent tissues was seen in the coronal, transaxial, and sagittal views.                                                                                                                                                             | Same as above                                                                                                                                                    | Same as above               | Same as above              |
| Etchebehere,<br>2014 <sup>25</sup><br>Fair | Not applicable                                              | MRI                 | Analyzed in terms of number, size, location, and signal intensity and were compared with the T1-weighted and short- $\tau$ inversion recovery sequences to rule out false-positive findings. Lymph nodes were defined as malignant according to the diameter of the small axis. | Same as above                                                                                                                                                    | Same as above               | Same as above              |

**Table 4a. Studies of Diagnostic Accuracy of SSTR-PET for Identification of NETs**

| <b>Author, year<br/>Quality</b>            | <b>Inclusion Criteria</b>                                                                                                                                                                                                                                                                                        | <b>Population Characteristics</b>                                                                                                                                                                                                                                           | <b>Sample Size<br/>Proportion<br/>With Condition</b> | <b>Analysis Method</b>                 | <b>TP</b> | <b>FP</b> | <b>FN</b> | <b>TN</b> | <b>Reported<br/>Sensitivity<br/>(95% CI)</b> |
|--------------------------------------------|------------------------------------------------------------------------------------------------------------------------------------------------------------------------------------------------------------------------------------------------------------------------------------------------------------------|-----------------------------------------------------------------------------------------------------------------------------------------------------------------------------------------------------------------------------------------------------------------------------|------------------------------------------------------|----------------------------------------|-----------|-----------|-----------|-----------|----------------------------------------------|
| Etchebehere,<br>2014 <sup>25</sup><br>Fair | Patients ≥18 years old with a histologic diagnosis of NET, suspected tumor recurrence, no prior history of toher malignant primary neoplasms, nonlactating and nonpregnant, undergo all imagining studies within an interval of ≤3 months, and receive no treatment or intervention during the imagining period. | Age (mean, years): 54.3; range: 34-77<br>Female: 47%<br>Primary site<br>-Bronchi: 22%<br>-Pancreas: 31%<br>-Gut: 31%<br>-Unknown: 16%<br>Ki-67 (mean): 9.5%; range: 1-26%<br>Chromogranin A (mean, ng/mL): 151.5; range: 1.6 to 901<br>Clinical follow-up (mean, months): 4 | N=19<br>100%                                         | Detection of NETs, per-lesion analysis | NR        | NR        | NR        | NR        | 96%                                          |
| Etchebehere,<br>2014 <sup>25</sup><br>Fair | Same as above                                                                                                                                                                                                                                                                                                    | Same as above                                                                                                                                                                                                                                                               | Same as above                                        | Detection of NETs, per-lesion analysis | NR        | NR        | NR        | NR        | 60%                                          |
| Etchebehere,<br>2014 <sup>25</sup><br>Fair | Same as above                                                                                                                                                                                                                                                                                                    | Same as above                                                                                                                                                                                                                                                               | Same as above                                        | Detection of NETs, per-lesion analysis | NR        | NR        | NR        | NR        | 72%                                          |

**Table 4a. Studies of Diagnostic Accuracy of SSTR-PET for Identification of NETs**

| <b>Author, year<br/>Quality</b>            | <b>Calculated<br/>Sensitivity<br/>(95% CI)</b> | <b>Reported<br/>Specificity<br/>(95% CI)</b> | <b>Calculated<br/>Specificity<br/>(95% CI)</b> | <b>Reported PPV<br/>(95% CI)</b> | <b>Calculated PPV<br/>(95% CI)</b> | <b>Reported NPV<br/>(95% CI)</b> | <b>Calculated NPV<br/>(95% CI)</b> |
|--------------------------------------------|------------------------------------------------|----------------------------------------------|------------------------------------------------|----------------------------------|------------------------------------|----------------------------------|------------------------------------|
| Etchebehere,<br>2014 <sup>25</sup><br>Fair | Unable to<br>calculate                         | 97%                                          | Unable to<br>calculate                         | 94%                              | Unable to<br>calculate             | 98%                              | Unable to<br>calculate             |
| Etchebehere,<br>2014 <sup>25</sup><br>Fair | Unable to<br>calculate                         | 99%                                          | Unable to<br>calculate                         | 96%                              | Unable to<br>calculate             | 83%                              | Unable to<br>calculate             |
| Etchebehere,<br>2014 <sup>25</sup><br>Fair | Unable to<br>calculate                         | 100%                                         | Unable to<br>calculate                         | 100%                             | Unable to<br>calculate             | 88%                              | Unable to<br>calculate             |

**Table 4a. Studies of Diagnostic Accuracy of SSTR-PET for Identification of NETs**

| <b>Author, year<br/>Quality</b>            | <b>Reported<br/>AUROC</b> | <b>Calculated PLR<br/>(95% CI)</b> | <b>Reported PLR<br/>(95% CI)</b> | <b>Calculated NLR<br/>(95% CI)</b> | <b>Reported NLR<br/>(95% CI)</b> | <b>Other<br/>Measures of<br/>Diagnostic<br/>Accuracy</b> | <b>Imaging<br/>Accuracy</b> |
|--------------------------------------------|---------------------------|------------------------------------|----------------------------------|------------------------------------|----------------------------------|----------------------------------------------------------|-----------------------------|
| Etchebehere,<br>2014 <sup>25</sup><br>Fair | NR                        | Unable to<br>calculate             | NR                               | Unable to<br>calculate             | NR                               | NR                                                       | 97%                         |
| Etchebehere,<br>2014 <sup>25</sup><br>Fair | NR                        | Unable to<br>calculate             | NR                               | Unable to<br>calculate             | NR                               | NR                                                       | 86%                         |
| Etchebehere,<br>2014 <sup>25</sup><br>Fair | NR                        | Unable to<br>calculate             | NR                               | Unable to<br>calculate             | NR                               | NR                                                       | 91%                         |

**Table 4a. Studies of Diagnostic Accuracy of SSTR-PET for Identification of NETs**

| <b>Author, year<br/>Quality</b>        | <b>Tracer</b>             | <b>Imaging Test</b> | <b>Definition of a Positive Test</b>                                                                                                                                                                                                                                                                                                             | <b>Reference Standard</b>                                                                                                                                                      | <b>Type of Study</b>        | <b>Country<br/>Setting</b>                |
|----------------------------------------|---------------------------|---------------------|--------------------------------------------------------------------------------------------------------------------------------------------------------------------------------------------------------------------------------------------------------------------------------------------------------------------------------------------------|--------------------------------------------------------------------------------------------------------------------------------------------------------------------------------|-----------------------------|-------------------------------------------|
| Froeling, 2012 <sup>26</sup><br>Fair   | <sup>68</sup> Ga-DOTATOC  | PET                 | Blinded radiologists and nuclear medicine physicians analyzed PET and CT separately first, then PET/CT. Lesions were characterized on a 3-point scale: non-MEN-associated lesions, equivocal lesions, MEN-associated lesions.                                                                                                                    | Histopathologic proof or confirmed by clinical and radiologic follow-up.                                                                                                       | Retrospective               | Germany<br>Setting unclear                |
| Froeling, 2012 <sup>26</sup><br>Fair   | <sup>68</sup> Ga-DOTATOC  | PET/CT              | Same as above                                                                                                                                                                                                                                                                                                                                    | Same as above                                                                                                                                                                  | Same as above               | Same as above                             |
| Froeling, 2012 <sup>26</sup><br>Fair   | Not applicable            | CT                  | Same as above                                                                                                                                                                                                                                                                                                                                    | Same as above                                                                                                                                                                  | Same as above               | Same as above                             |
| Gabriel, 2007 <sup>27</sup><br>Good    | <sup>68</sup> Ga-DOTATOC  | PET                 | Clearly demarked findings with higher tracer uptake compared with liver uptake, tracer accumulation in structures that did not take up tracer physiologically or was higher than background activity, or pancreatic head: irregular or protrusive shape of finding; clear delineation from adjacent tissue with higher uptake than liver uptake. | Histological confirmation and repeated clinical examinations with CT or MRI after 3 or 6 months for positive findings and follow-up imaging after 6 months for negative scans. | Prospective cohort          | Austria<br>Department of Nuclear Medicine |
| Gabriel, 2007 <sup>27</sup><br>Good    | Not applicable            | CT                  | Specific appearance of malignant disease derived from NET.                                                                                                                                                                                                                                                                                       | Same as above                                                                                                                                                                  | Same as above               | Same as above                             |
| Has Simsek, 2014 <sup>28</sup><br>Poor | <sup>68</sup> Ga-DOTATATE | PET/CT              | Significant accumulation of the tracer based on visual assessment                                                                                                                                                                                                                                                                                | Histology.                                                                                                                                                                     | Prospective cross-sectional | Turkey<br>Setting: NR                     |
| Has Simsek, 2014 <sup>28</sup><br>Poor | <sup>18</sup> F-FDG       | PET/CT              | Same as above                                                                                                                                                                                                                                                                                                                                    | Same as above                                                                                                                                                                  | Same as above               | Same as above                             |

**Table 4a. Studies of Diagnostic Accuracy of SSTR-PET for Identification of NETs**

| <b>Author, year<br/>Quality</b>        | <b>Inclusion Criteria</b>                                                                   | <b>Population Characteristics</b>                                                                                                                                   | <b>Sample Size<br/>Proportion<br/>With Condition</b> | <b>Analysis Method</b>                             | <b>TP</b> | <b>FP</b> | <b>FN</b> | <b>TN</b> | <b>Reported<br/>Sensitivity<br/>(95% CI)</b> |
|----------------------------------------|---------------------------------------------------------------------------------------------|---------------------------------------------------------------------------------------------------------------------------------------------------------------------|------------------------------------------------------|----------------------------------------------------|-----------|-----------|-----------|-----------|----------------------------------------------|
| Froeling, 2012 <sup>26</sup><br>Fair   | MEN syndrome verified histopathologically or by clinical parameters and imaging modalities. | Age (mean, years): 41.4; range: 16-78<br>Female: 48%                                                                                                                | N=21<br>100%                                         | Detection of NET lesions                           | NR        | NR        | NR        | NR        | 85%                                          |
| Froeling, 2012 <sup>26</sup><br>Fair   | Same as above                                                                               | Same as above                                                                                                                                                       | Same as above                                        | Detection of NET lesions                           | NR        | NR        | NR        | NR        | 92%                                          |
| Froeling, 2012 <sup>26</sup><br>Fair   | Same as above                                                                               | Same as above                                                                                                                                                       | Same as above                                        | Detection of NET lesions                           | NR        | NR        | NR        | NR        | 43%                                          |
| Gabriel, 2007 <sup>27</sup><br>Good    | Unclear                                                                                     | Age (mean, years): 58.2; range: 28-79<br>Female: 43%<br>Enrolled for initial detection: 15%<br>Enrolled for staging: 43%<br>Enrolled for posttherapy follow-up: 42% | N=84<br>84%                                          | Detection of NETs, per-patient analysis            | 69        | 1         | 2         | 12        | 97%                                          |
| Gabriel, 2007 <sup>27</sup><br>Good    | Same as above                                                                               | Same as above                                                                                                                                                       | Same as above                                        | Detection of NETs, per-patient analysis            | 41        | 5         | 26        | 12        | 61%                                          |
| Has Simsek, 2014 <sup>28</sup><br>Poor | Patients with histologically proven GEP NETs                                                | Age (mean, years): 56; range: 33-79<br>Female: 63%                                                                                                                  | N=27<br>100%                                         | Detection of GEP NETs overall, per-lesion analysis | NR        | 5         | NR        | NR        | 95%                                          |
| Has Simsek, 2014 <sup>28</sup><br>Poor | Same as above                                                                               | Same as above                                                                                                                                                       | Same as above                                        | Detection of GEP NETs overall, per-lesion analysis | NR        | 8         | NR        | NR        | 37%                                          |



**Table 4a. Studies of Diagnostic Accuracy of SSTR-PET for Identification of NETs**

| <b>Author, year<br/>Quality</b>           | <b>Calculated<br/>Sensitivity<br/>(95% CI)</b> | <b>Reported<br/>Specificity<br/>(95% CI)</b> | <b>Calculated<br/>Specificity<br/>(95% CI)</b> | <b>Reported PPV<br/>(95% CI)</b> | <b>Calculated PPV<br/>(95% CI)</b> | <b>Reported NPV<br/>(95% CI)</b> | <b>Calculated NPV<br/>(95% CI)</b> |
|-------------------------------------------|------------------------------------------------|----------------------------------------------|------------------------------------------------|----------------------------------|------------------------------------|----------------------------------|------------------------------------|
| Froeling, 2012 <sup>26</sup><br>Fair      | Unable to<br>calculate                         | 97%                                          | Unable to<br>calculate                         | NR                               | Unable to<br>calculate             | NR                               | Unable to<br>calculate             |
| Froeling, 2012 <sup>26</sup><br>Fair      | Unable to<br>calculate                         | 94%                                          | Unable to<br>calculate                         | NR                               | Unable to<br>calculate             | NR                               | Unable to<br>calculate             |
| Froeling, 2012 <sup>26</sup><br>Fair      | Unable to<br>calculate                         | 61%                                          | Unable to<br>calculate                         | NR                               | Unable to<br>calculate             | NR                               | Unable to<br>calculate             |
| Gabriel, 2007 <sup>27</sup><br>Good       | 97.18% (90.19 to<br>99.66)                     | 92%                                          | 92.31% (63.97 to<br>99.81)                     | NR                               | 98.57% ( 91.30 to<br>99.78)        | NR                               | 85.71% (60.26 to<br>95.96)         |
| Gabriel, 2007 <sup>27</sup><br>Good       | 61.19% (48.50 to<br>72.86)                     | 71%                                          | 70.59% (44.04 to<br>89.69)                     | NR                               | 89.13% (79.30 to<br>94.61)         | NR                               | 31.58% (23.10 to<br>41.49)         |
| Has Simsek,<br>2014 <sup>28</sup><br>Poor | Unable to<br>calculate                         | NR                                           | Unable to<br>calculate                         | 94%                              | Unable to<br>calculate             | NR                               | Unable to<br>calculate             |
| Has Simsek,<br>2014 <sup>28</sup><br>Poor | Unable to<br>calculate                         | NR                                           | Unable to<br>calculate                         | 36%                              | Unable to<br>calculate             | NR                               | Unable to<br>calculate             |

**Table 4a. Studies of Diagnostic Accuracy of SSTR-PET for Identification of NETs**

| <b>Author, year<br/>Quality</b>           | <b>Reported<br/>AUROC</b> | <b>Calculated PLR<br/>(95% CI)</b> | <b>Reported PLR<br/>(95% CI)</b> | <b>Calculated NLR<br/>(95% CI)</b> | <b>Reported NLR<br/>(95% CI)</b> | <b>Other<br/>Measures of<br/>Diagnostic<br/>Accuracy</b> | <b>Imaging<br/>Accuracy</b> |
|-------------------------------------------|---------------------------|------------------------------------|----------------------------------|------------------------------------|----------------------------------|----------------------------------------------------------|-----------------------------|
| Froeling, 2012 <sup>26</sup><br>Fair      | NR                        | Unable to<br>calculate             | NR                               | Unable to<br>calculate             | NR                               | NR                                                       | NR                          |
| Froeling, 2012 <sup>26</sup><br>Fair      | NR                        | Unable to<br>calculate             | NR                               | Unable to<br>calculate             | NR                               | NR                                                       | NR                          |
| Froeling, 2012 <sup>26</sup><br>Fair      | NR                        | Unable to<br>calculate             | NR                               | Unable to<br>calculate             | NR                               | NR                                                       | NR                          |
| Gabriel, 2007 <sup>27</sup><br>Good       | NR                        | 12.63 (1.92 to<br>83.09)           | NR                               | 0.03 (0.01 to 0.12)                | NR                               | NR                                                       | 96%                         |
| Gabriel, 2007 <sup>27</sup><br>Good       | NR                        | 2.08 (0.97 to 4.45)                | NR                               | 0.55 (0.36 to 0.84)                | NR                               | NR                                                       | 63%                         |
| Has Simsek,<br>2014 <sup>28</sup><br>Poor | NR                        | Unable to<br>calculate             | NR                               | Unable to<br>calculate             | NR                               | NR                                                       | NR                          |
| Has Simsek,<br>2014 <sup>28</sup><br>Poor | NR                        | Unable to<br>calculate             | NR                               | Unable to<br>calculate             | NR                               | NR                                                       | NR                          |

**Table 4a. Studies of Diagnostic Accuracy of SSTR-PET for Identification of NETs**

| <b>Author, year<br/>Quality</b>           | <b>Tracer</b>             | <b>Imaging Test</b> | <b>Definition of a Positive Test</b> | <b>Reference Standard</b> | <b>Type of Study</b> | <b>Country<br/>Setting</b> |
|-------------------------------------------|---------------------------|---------------------|--------------------------------------|---------------------------|----------------------|----------------------------|
| Has Simsek,<br>2014 <sup>28</sup><br>Poor | <sup>68</sup> Ga-DOTATATE | PET/CT              | Same as above                        | Same as above             | Same as<br>above     | Same as above              |
| Has Simsek,<br>2014 <sup>28</sup><br>Poor | <sup>18</sup> F-FDG       | PET/CT              | Same as above                        | Same as above             | Same as<br>above     | Same as above              |
| Has Simsek,<br>2014 <sup>28</sup><br>Poor | <sup>68</sup> Ga-DOTATATE | PET/CT              | Same as above                        | Same as above             | Same as<br>above     | Same as above              |
| Has Simsek,<br>2014 <sup>28</sup><br>Poor | <sup>18</sup> F-FDG       | PET/CT              | Same as above                        | Same as above             | Same as<br>above     | Same as above              |
| Has Simsek,<br>2014 <sup>28</sup><br>Poor | <sup>68</sup> Ga-DOTATATE | PET/CT              | Same as above                        | Same as above             | Same as<br>above     | Same as above              |
| Has Simsek,<br>2014 <sup>28</sup><br>Poor | <sup>18</sup> F-FDG       | PET/CT              | Same as above                        | Same as above             | Same as<br>above     | Same as above              |
| Has Simsek,<br>2014 <sup>28</sup><br>Poor | <sup>68</sup> Ga-DOTATATE | PET/CT              | Same as above                        | Same as above             | Same as<br>above     | Same as above              |
| Has Simsek,<br>2014 <sup>28</sup><br>Poor | <sup>18</sup> F-FDG       | PET/CT              | Same as above                        | Same as above             | Same as<br>above     | Same as above              |
| Has Simsek,<br>2014 <sup>28</sup><br>Poor | <sup>68</sup> Ga-DOTATATE | PET/CT              | Same as above                        | Same as above             | Same as<br>above     | Same as above              |
| Has Simsek,<br>2014 <sup>28</sup><br>Poor | <sup>18</sup> F-FDG       | PET/CT              | Same as above                        | Same as above             | Same as<br>above     | Same as above              |
| Has Simsek,<br>2014 <sup>28</sup><br>Poor | <sup>68</sup> Ga-DOTATATE | PET/CT              | Same as above                        | Same as above             | Same as<br>above     | Same as above              |
| Has Simsek,<br>2014 <sup>28</sup><br>Poor | <sup>18</sup> F-FDG       | PET/CT              | Same as above                        | Same as above             | Same as<br>above     | Same as above              |
| Has Simsek,<br>2014 <sup>28</sup><br>Poor | <sup>68</sup> Ga-DOTATATE | PET/CT              | Same as above                        | Same as above             | Same as<br>above     | Same as above              |

**Table 4a. Studies of Diagnostic Accuracy of SSTR-PET for Identification of NETs**

| <b>Author, year<br/>Quality</b>           | <b>Inclusion Criteria</b> | <b>Population Characteristics</b> | <b>Sample Size<br/>Proportion<br/>With Condition</b> | <b>Analysis Method</b>                                               | <b>TP</b> | <b>FP</b> | <b>FN</b> | <b>TN</b> | <b>Reported<br/>Sensitivity<br/>(95% CI)</b> |
|-------------------------------------------|---------------------------|-----------------------------------|------------------------------------------------------|----------------------------------------------------------------------|-----------|-----------|-----------|-----------|----------------------------------------------|
| Has Simsek,<br>2014 <sup>28</sup><br>Poor | Same as above             | Same as above                     | Same as above                                        | Detection of GEP NETs<br>in the liver, per-lesion<br>analysis        | NR        | NR        | NR        | NR        | 95%                                          |
| Has Simsek,<br>2014 <sup>28</sup><br>Poor | Same as above             | Same as above                     | Same as above                                        | Detection of GEP NETs<br>in the liver, per-lesion<br>analysis        | NR        | NR        | NR        | NR        | 40%                                          |
| Has Simsek,<br>2014 <sup>28</sup><br>Poor | Same as above             | Same as above                     | Same as above                                        | Detection of GEP NETs<br>in the bone, per-lesion<br>analysis         | NR        | NR        | NR        | NR        | 95%                                          |
| Has Simsek,<br>2014 <sup>28</sup><br>Poor | Same as above             | Same as above                     | Same as above                                        | Detection of GEP NETs<br>in the bone, per-lesion<br>analysis         | NR        | NR        | NR        | NR        | 28%                                          |
| Has Simsek,<br>2014 <sup>28</sup><br>Poor | Same as above             | Same as above                     | Same as above                                        | Detection of GEP NETs<br>in the lymph nodes, per-<br>lesion analysis | NR        | NR        | NR        | NR        | 90%                                          |
| Has Simsek,<br>2014 <sup>28</sup><br>Poor | Same as above             | Same as above                     | Same as above                                        | Detection of GEP NETs<br>in the lymph nodes, per-<br>lesion analysis | NR        | NR        | NR        | NR        | 28%                                          |
| Has Simsek,<br>2014 <sup>28</sup><br>Poor | Same as above             | Same as above                     | Same as above                                        | Detection of GEP NETs<br>primary lesions, per-<br>lesion analysis    | NR        | NR        | NR        | NR        | 93%                                          |
| Has Simsek,<br>2014 <sup>28</sup><br>Poor | Same as above             | Same as above                     | Same as above                                        | Detection of GEP NETs<br>primary lesions, per-<br>lesion analysis    | NR        | NR        | NR        | NR        | 75%                                          |
| Has Simsek,<br>2014 <sup>28</sup><br>Poor | Same as above             | Same as above                     | Same as above                                        | Detection of GEP NETs<br>Grade 1, per-lesion<br>analysis             | NR        | NR        | NR        | NR        | 100%                                         |
| Has Simsek,<br>2014 <sup>28</sup><br>Poor | Same as above             | Same as above                     | Same as above                                        | Detection of GEP NETs<br>Grade 1, per-lesion<br>analysis             | NR        | NR        | NR        | NR        | 17%                                          |
| Has Simsek,<br>2014 <sup>28</sup><br>Poor | Same as above             | Same as above                     | Same as above                                        | Detection of GEP NETs<br>Grade 2, per-lesion<br>analysis             | NR        | NR        | NR        | NR        | 91%                                          |

**Table 4a. Studies of Diagnostic Accuracy of SSTR-PET for Identification of NETs**

| <b>Author, year<br/>Quality</b>           | <b>Calculated<br/>Sensitivity<br/>(95% CI)</b> | <b>Reported<br/>Specificity<br/>(95% CI)</b> | <b>Calculated<br/>Specificity<br/>(95% CI)</b> | <b>Reported PPV<br/>(95% CI)</b> | <b>Calculated PPV<br/>(95% CI)</b> | <b>Reported NPV<br/>(95% CI)</b> | <b>Calculated NPV<br/>(95% CI)</b> |
|-------------------------------------------|------------------------------------------------|----------------------------------------------|------------------------------------------------|----------------------------------|------------------------------------|----------------------------------|------------------------------------|
| Has Simsek,<br>2014 <sup>28</sup><br>Poor | Unable to<br>calculate                         | NR                                           | Unable to<br>calculate                         | NR                               | Unable to<br>calculate             | NR                               | Unable to<br>calculate             |
| Has Simsek,<br>2014 <sup>28</sup><br>Poor | Unable to<br>calculate                         | NR                                           | Unable to<br>calculate                         | NR                               | Unable to<br>calculate             | NR                               | Unable to<br>calculate             |
| Has Simsek,<br>2014 <sup>28</sup><br>Poor | Unable to<br>calculate                         | NR                                           | Unable to<br>calculate                         | NR                               | Unable to<br>calculate             | NR                               | Unable to<br>calculate             |
| Has Simsek,<br>2014 <sup>28</sup><br>Poor | Unable to<br>calculate                         | NR                                           | Unable to<br>calculate                         | NR                               | Unable to<br>calculate             | NR                               | Unable to<br>calculate             |
| Has Simsek,<br>2014 <sup>28</sup><br>Poor | Unable to<br>calculate                         | NR                                           | Unable to<br>calculate                         | NR                               | Unable to<br>calculate             | NR                               | Unable to<br>calculate             |
| Has Simsek,<br>2014 <sup>28</sup><br>Poor | Unable to<br>calculate                         | NR                                           | Unable to<br>calculate                         | NR                               | Unable to<br>calculate             | NR                               | Unable to<br>calculate             |
| Has Simsek,<br>2014 <sup>28</sup><br>Poor | Unable to<br>calculate                         | NR                                           | Unable to<br>calculate                         | NR                               | Unable to<br>calculate             | NR                               | Unable to<br>calculate             |
| Has Simsek,<br>2014 <sup>28</sup><br>Poor | Unable to<br>calculate                         | NR                                           | Unable to<br>calculate                         | NR                               | Unable to<br>calculate             | NR                               | Unable to<br>calculate             |
| Has Simsek,<br>2014 <sup>28</sup><br>Poor | Unable to<br>calculate                         | NR                                           | Unable to<br>calculate                         | NR                               | Unable to<br>calculate             | NR                               | Unable to<br>calculate             |
| Has Simsek,<br>2014 <sup>28</sup><br>Poor | Unable to<br>calculate                         | NR                                           | Unable to<br>calculate                         | NR                               | Unable to<br>calculate             | NR                               | Unable to<br>calculate             |
| Has Simsek,<br>2014 <sup>28</sup><br>Poor | Unable to<br>calculate                         | NR                                           | Unable to<br>calculate                         | NR                               | Unable to<br>calculate             | NR                               | Unable to<br>calculate             |

**Table 4a. Studies of Diagnostic Accuracy of SSTR-PET for Identification of NETs**

| <b>Author, year<br/>Quality</b>           | <b>Reported<br/>AUROC</b> | <b>Calculated PLR<br/>(95% CI)</b> | <b>Reported PLR<br/>(95% CI)</b> | <b>Calculated NLR<br/>(95% CI)</b> | <b>Reported NLR<br/>(95% CI)</b> | <b>Other<br/>Measures of<br/>Diagnostic<br/>Accuracy</b> | <b>Imaging<br/>Accuracy</b> |
|-------------------------------------------|---------------------------|------------------------------------|----------------------------------|------------------------------------|----------------------------------|----------------------------------------------------------|-----------------------------|
| Has Simsek,<br>2014 <sup>28</sup><br>Poor | NR                        | Unable to<br>calculate             | NR                               | Unable to<br>calculate             | NR                               | NR                                                       | NR                          |
| Has Simsek,<br>2014 <sup>28</sup><br>Poor | NR                        | Unable to<br>calculate             | NR                               | Unable to<br>calculate             | NR                               | NR                                                       | NR                          |
| Has Simsek,<br>2014 <sup>28</sup><br>Poor | NR                        | Unable to<br>calculate             | NR                               | Unable to<br>calculate             | NR                               | NR                                                       | NR                          |
| Has Simsek,<br>2014 <sup>28</sup><br>Poor | NR                        | Unable to<br>calculate             | NR                               | Unable to<br>calculate             | NR                               | NR                                                       | NR                          |
| Has Simsek,<br>2014 <sup>28</sup><br>Poor | NR                        | Unable to<br>calculate             | NR                               | Unable to<br>calculate             | NR                               | NR                                                       | NR                          |
| Has Simsek,<br>2014 <sup>28</sup><br>Poor | NR                        | Unable to<br>calculate             | NR                               | Unable to<br>calculate             | NR                               | NR                                                       | NR                          |
| Has Simsek,<br>2014 <sup>28</sup><br>Poor | NR                        | Unable to<br>calculate             | NR                               | Unable to<br>calculate             | NR                               | NR                                                       | NR                          |
| Has Simsek,<br>2014 <sup>28</sup><br>Poor | NR                        | Unable to<br>calculate             | NR                               | Unable to<br>calculate             | NR                               | NR                                                       | NR                          |
| Has Simsek,<br>2014 <sup>28</sup><br>Poor | NR                        | Unable to<br>calculate             | NR                               | Unable to<br>calculate             | NR                               | NR                                                       | NR                          |
| Has Simsek,<br>2014 <sup>28</sup><br>Poor | NR                        | Unable to<br>calculate             | NR                               | Unable to<br>calculate             | NR                               | NR                                                       | NR                          |
| Has Simsek,<br>2014 <sup>28</sup><br>Poor | NR                        | Unable to<br>calculate             | NR                               | Unable to<br>calculate             | NR                               | NR                                                       | NR                          |

**Table 4a. Studies of Diagnostic Accuracy of SSTR-PET for Identification of NETs**

| <b>Author, year<br/>Quality</b>           | <b>Tracer</b>             | <b>Imaging Test</b>  | <b>Definition of a Positive Test</b>                                                                                                               | <b>Reference Standard</b>               | <b>Type of Study</b> | <b>Country<br/>Setting</b> |
|-------------------------------------------|---------------------------|----------------------|----------------------------------------------------------------------------------------------------------------------------------------------------|-----------------------------------------|----------------------|----------------------------|
| Has Simsek,<br>2014 <sup>28</sup><br>Poor | <sup>18</sup> F-FDG       | PET/CT               | Same as above                                                                                                                                      | Same as above                           | Same as above        | Same as above              |
| Has Simsek,<br>2014 <sup>28</sup><br>Poor | <sup>68</sup> Ga-DOTATATE | PET/CT               | Same as above                                                                                                                                      | Same as above                           | Same as above        | Same as above              |
| Has Simsek,<br>2014 <sup>28</sup><br>Poor | <sup>18</sup> F-FDG       | PET/CT               | Same as above                                                                                                                                      | Same as above                           | Same as above        | Same as above              |
| Kumar, 2011 <sup>29</sup><br>Poor         | <sup>68</sup> Ga-DOTATOC  | PET/CT               | Any non physiological uptake more than surrounding tissue.                                                                                         | Biopsy/histopathology                   | Prospective cohort   | India<br>Setting: NR       |
| Kumar, 2011 <sup>29</sup><br>Poor         | <sup>18</sup> F-FDG       | PET/CT               | Any non physiological focal area of increased <sup>18</sup> F-FDG uptake was looked for, keeping physiological tracer distribution in perspective. | Same as above                           | Same as above        | Same as above              |
| Kumar, 2011 <sup>29</sup><br>Poor         | Not applicable            | Contrast enhanced CT | Assessed by experienecd radiologists for evidence of primary/metastatic disease.                                                                   | Same as above                           | Same as above        | Same as above              |
| Kumar, 2011 <sup>29</sup><br>Poor         | <sup>68</sup> Ga-DOTATOC  | PET/CT               | Any non physiological uptake more than surrounding tissue.                                                                                         | Clinical follow-up, MRI, and/or biopsy. | Same as above        | Same as above              |
| Kumar, 2011 <sup>29</sup><br>Poor         | <sup>18</sup> F-FDG       | PET/CT               | Any non physiological focal area of increased <sup>18</sup> F-FDG uptake was looked for, keeping physiological tracer distribution in perspective. | Clinical follow-up, MRI, and/or biopsy. | Same as above        | Same as above              |
| Kumar, 2011 <sup>29</sup><br>Poor         | Not applicable            | CE-CT                | Assessed by experienecd radiologists for evidence of primary/metastatic disease.                                                                   | Clinical follow-up, MRI, and/or biopsy. | Same as above        | Same as above              |

**Table 4a. Studies of Diagnostic Accuracy of SSTR-PET for Identification of NETs**

| <b>Author, year<br/>Quality</b>           | <b>Inclusion Criteria</b>                                                                                                                                                                                         | <b>Population Characteristics</b>                                                                                           | <b>Sample Size<br/>Proportion<br/>With Condition</b> | <b>Analysis Method</b>                                   | <b>TP</b> | <b>FP</b>   | <b>FN</b>   | <b>TN</b>   | <b>Reported<br/>Sensitivity<br/>(95% CI)</b> |
|-------------------------------------------|-------------------------------------------------------------------------------------------------------------------------------------------------------------------------------------------------------------------|-----------------------------------------------------------------------------------------------------------------------------|------------------------------------------------------|----------------------------------------------------------|-----------|-------------|-------------|-------------|----------------------------------------------|
| Has Simsek,<br>2014 <sup>28</sup><br>Poor | Same as above                                                                                                                                                                                                     | Same as above                                                                                                               | Same as above                                        | Detection of GEP NETs<br>Grade 2, per-lesion<br>analysis | NR        | NR          | NR          | NR          | 43%                                          |
| Has Simsek,<br>2014 <sup>28</sup><br>Poor | Same as above                                                                                                                                                                                                     | Same as above                                                                                                               | Same as above                                        | Detection of GEP NETs<br>Grade 3, per-lesion<br>analysis | NR        | NR          | NR          | NR          | 92%                                          |
| Has Simsek,<br>2014 <sup>28</sup><br>Poor | Same as above                                                                                                                                                                                                     | Same as above                                                                                                               | Same as above                                        | Detection of GEP NETs<br>Grade 3, per-lesion<br>analysis | NR        | NR          | NR          | NR          | 51%                                          |
| Kumar, 2011 <sup>29</sup><br>Poor         | Patients with clinically<br>suspected and/or<br>histopathologically proven<br>pancreatic NET who<br>underwent <sup>68</sup> Ga-DOTATOC<br>PET/CT imaging for staging<br>and/or localisation of primary<br>lesion. | Age (median, years): 42.5; IQR:<br>37.5-54.5<br>Female: 50%<br>Serum chromogranin (median,<br>ng/ml): 316; IQR: 251.5-745.5 | N=20<br>100%                                         | Detection of primary<br>NETs, per-patient<br>analysis    | 20        | 0           | 0           | 0           | 100% (83.01 to<br>100)                       |
| Kumar, 2011 <sup>29</sup><br>Poor         | Same as above                                                                                                                                                                                                     | Same as above                                                                                                               | N=8<br>100%                                          | Detection of primary<br>NETs, per-patient<br>analysis    | 2         | 0           | 6           | 0           | 25% (3.9 to 64.9)                            |
| Kumar, 2011 <sup>29</sup><br>Poor         | Same as above                                                                                                                                                                                                     | Same as above                                                                                                               | N=20<br>100%                                         | Detection of primary<br>NETs, per-patient<br>analysis    | 16        | 2           | 3           | 0           | 83.3% (58.5 to<br>96.2)                      |
| Kumar, 2011 <sup>29</sup><br>Poor         | Same as above                                                                                                                                                                                                     | Same as above                                                                                                               | N=20<br>100%                                         | Detection of metastatic<br>disease                       | 13        | 1           | Uncl<br>ear | Uncl<br>ear | 92.8% (66 to<br>98.8)                        |
| Kumar, 2011 <sup>29</sup><br>Poor         | Same as above                                                                                                                                                                                                     | Same as above                                                                                                               | N=8<br>100%                                          | Detection of metastatic<br>disease                       | 2         | Unc<br>lear | Uncl<br>ear | Uncl<br>ear | 20% (3.1 to 55.5)                            |
| Kumar, 2011 <sup>29</sup><br>Poor         | Same as above                                                                                                                                                                                                     | Same as above                                                                                                               | N=20<br>100%                                         | Detection of metastatic<br>disease                       | 7         | Unc<br>lear | Uncl<br>ear | Uncl<br>ear | 57.1% (28.9 to<br>82.2)                      |



**Table 4a. Studies of Diagnostic Accuracy of SSTR-PET for Identification of NETs**

| <b>Author, year<br/>Quality</b>           | <b>Calculated<br/>Sensitivity<br/>(95% CI)</b> | <b>Reported<br/>Specificity<br/>(95% CI)</b> | <b>Calculated<br/>Specificity<br/>(95% CI)</b> | <b>Reported PPV<br/>(95% CI)</b> | <b>Calculated PPV<br/>(95% CI)</b> | <b>Reported NPV<br/>(95% CI)</b> | <b>Calculated NPV<br/>(95% CI)</b> |
|-------------------------------------------|------------------------------------------------|----------------------------------------------|------------------------------------------------|----------------------------------|------------------------------------|----------------------------------|------------------------------------|
| Has Simsek,<br>2014 <sup>28</sup><br>Poor | Unable to<br>calculate                         | NR                                           | Unable to<br>calculate                         | NR                               | Unable to<br>calculate             | NR                               | Unable to<br>calculate             |
| Has Simsek,<br>2014 <sup>28</sup><br>Poor | Unable to<br>calculate                         | NR                                           | Unable to<br>calculate                         | NR                               | Unable to<br>calculate             | NR                               | Unable to<br>calculate             |
| Has Simsek,<br>2014 <sup>28</sup><br>Poor | Unable to<br>calculate                         | NR                                           | Unable to<br>calculate                         | NR                               | Unable to<br>calculate             | NR                               | Unable to<br>calculate             |
| Kumar, 2011 <sup>29</sup><br>Poor         | 100% (83.16 to<br>100)                         | NR                                           | Unable to<br>calculate                         | 100% (83.01 to<br>100)           | 100% (83.16 to<br>100)             | NR                               | Unable to<br>calculate             |
| Kumar, 2011 <sup>29</sup><br>Poor         | 25% (3.19 to<br>65.09)                         | NR                                           | Unable to<br>calculate                         | 100% (19.2 to<br>100)            | 100% (63.06 to<br>100)             | NR                               | Unable to<br>calculate             |
| Kumar, 2011 <sup>29</sup><br>Poor         | 84.21% (60.42 to<br>96.62)                     | NR                                           | 0% (0 to 84.19)                                | 88.2% (63.5 to<br>98.2)          | 88.89% (86.82 to<br>90.67)         | NR                               | Unable to<br>calculate             |
| Kumar, 2011 <sup>29</sup><br>Poor         | Unable to<br>calculate                         | 100% (54 to 100)                             | Unable to<br>calculate                         | 100% (75.1 to<br>100)            | Unable to<br>calculate             | 85.7% (42.2 to<br>97.6)          | Unable to<br>calculate             |
| Kumar, 2011 <sup>29</sup><br>Poor         | Unable to<br>calculate                         | 100% (16.5 to<br>100)                        | Unable to<br>calculate                         | 100% (19.2 to<br>100)            | Unable to<br>calculate             | 11.1% (1.8 to<br>48.2)           | Unable to<br>calculate             |
| Kumar, 2011 <sup>29</sup><br>Poor         | Unable to<br>calculate                         | 100% (54 to 100)                             | Unable to<br>calculate                         | 100% (62.9 to<br>100)            | Unable to<br>calculate             | 50% (21.2 to<br>78.7)            | Unable to<br>calculate             |

**Table 4a. Studies of Diagnostic Accuracy of SSTR-PET for Identification of NETs**

| <b>Author, year<br/>Quality</b>           | <b>Reported<br/>AUROC</b> | <b>Calculated PLR<br/>(95% CI)</b> | <b>Reported PLR<br/>(95% CI)</b> | <b>Calculated NLR<br/>(95% CI)</b> | <b>Reported NLR<br/>(95% CI)</b> | <b>Other<br/>Measures of<br/>Diagnostic<br/>Accuracy</b> | <b>Imaging<br/>Accuracy</b> |
|-------------------------------------------|---------------------------|------------------------------------|----------------------------------|------------------------------------|----------------------------------|----------------------------------------------------------|-----------------------------|
| Has Simsek,<br>2014 <sup>28</sup><br>Poor | NR                        | Unable to<br>calculate             | NR                               | Unable to<br>calculate             | NR                               | NR                                                       | NR                          |
| Has Simsek,<br>2014 <sup>28</sup><br>Poor | NR                        | Unable to<br>calculate             | NR                               | Unable to<br>calculate             | NR                               | NR                                                       | NR                          |
| Has Simsek,<br>2014 <sup>28</sup><br>Poor | NR                        | Unable to<br>calculate             | NR                               | Unable to<br>calculate             | NR                               | NR                                                       | NR                          |
| Kumar, 2011 <sup>29</sup><br>Poor         | NR                        | 1                                  | NR                               | Unable to<br>calculate             | NR                               | NR                                                       | NR                          |
| Kumar, 2011 <sup>29</sup><br>Poor         | NR                        | 0.25                               | NR                               | Unable to<br>calculate             | NR                               | NR                                                       | NR                          |
| Kumar, 2011 <sup>29</sup><br>Poor         | NR                        | 0.84 (0.69 to 1.02)                | NR                               | Unable to<br>calculate             | NR                               | NR                                                       | NR                          |
| Kumar, 2011 <sup>29</sup><br>Poor         | NR                        | Unable to<br>calculate             | NR                               | Unable to<br>calculate             | NR                               | NR                                                       | NR                          |
| Kumar, 2011 <sup>29</sup><br>Poor         | NR                        | Unable to<br>calculate             | NR                               | Unable to<br>calculate             | NR                               | NR                                                       | NR                          |
| Kumar, 2011 <sup>29</sup><br>Poor         | NR                        | Unable to<br>calculate             | NR                               | Unable to<br>calculate             | NR                               | NR                                                       | NR                          |

**Table 4a. Studies of Diagnostic Accuracy of SSTR-PET for Identification of NETs**

| <b>Author, year<br/>Quality</b>    | <b>Tracer</b>                                                                               | <b>Imaging Test</b> | <b>Definition of a Positive Test</b>                                                                                                                            | <b>Reference Standard</b>                                                                                                                                                                    | <b>Type of Study</b> | <b>Country<br/>Setting</b>    |
|------------------------------------|---------------------------------------------------------------------------------------------|---------------------|-----------------------------------------------------------------------------------------------------------------------------------------------------------------|----------------------------------------------------------------------------------------------------------------------------------------------------------------------------------------------|----------------------|-------------------------------|
| Lococo, 2015 <sup>30</sup><br>Poor | <sup>68</sup> Ga-DOTATOC or<br><sup>68</sup> Ga-DOTATATE<br>or <sup>68</sup> Ga-<br>DOTANOC | PET/CT              | Any focal accumulation of each<br>tracer in the lung nodule higher<br>than the surrounding uptake.                                                              | Histological diagnosis.                                                                                                                                                                      | Retrospective        | Italy<br>2 PET/CT centers     |
| Lococo, 2015 <sup>30</sup><br>Poor | <sup>18</sup> F-FDG                                                                         | PET/CT              | Same as above                                                                                                                                                   | Same as above                                                                                                                                                                                | Same as<br>above     | Same as above                 |
| Morgat, 2016 <sup>31</sup><br>Fair | <sup>68</sup> Ga-DOTATOC                                                                    | PET/CT              | Focally increased uptake,<br>compared with that of the<br>surrounding tissue.                                                                                   | Combination of unblinded<br>analysis of the CE-CT with<br>complementary investigations<br>(MRI, EUS, <sup>18</sup> F-FDG PET, or<br>histology, performed on an<br>individual basis) results. | Retrospective        | France<br>University hospital |
| Morgat, 2016 <sup>31</sup><br>Fair | <sup>111</sup> In-Pentetreotide                                                             | SPECT/CT            | Increased uptake was assessed by<br>comparison with uptake by liver<br>tissue, according to the European<br>Association of Nuclear Medicine<br>recommendations. | Combination of unblinded<br>analysis of the CE-CT with<br>complementary investigations<br>(MRI, EUS, <sup>18</sup> F-FDG PET, or<br>histology, performed on an<br>individual basis) results. | Same as<br>above     | Same as above                 |
| Morgat, 2016 <sup>31</sup><br>Fair | 2 ml/kg iohexol<br>contrast media                                                           | CE-CT               | Radiologist's blinded reading                                                                                                                                   | Combination of unblinded<br>analysis of the CE-CT with<br>complementary investigations<br>(MRI, EUS, <sup>18</sup> F-FDG PET, or<br>histology, performed on an<br>individual basis) results. | Same as<br>above     | Same as above                 |

**Table 4a. Studies of Diagnostic Accuracy of SSTR-PET for Identification of NETs**

| <b>Author, year<br/>Quality</b>    | <b>Inclusion Criteria</b>                                                                                                                                                                                          | <b>Population Characteristics</b>                                                                      | <b>Sample Size<br/>Proportion<br/>With Condition</b> | <b>Analysis Method</b>                                   | <b>TP</b> | <b>FP</b> | <b>FN</b> | <b>TN</b> | <b>Reported<br/>Sensitivity<br/>(95% CI)</b> |
|------------------------------------|--------------------------------------------------------------------------------------------------------------------------------------------------------------------------------------------------------------------|--------------------------------------------------------------------------------------------------------|------------------------------------------------------|----------------------------------------------------------|-----------|-----------|-----------|-----------|----------------------------------------------|
| Lococo, 2015 <sup>30</sup><br>Poor | Availability of clinical charts; chest CT, <sup>18</sup> F-FDG PET/CT, and <sup>68</sup> Ga-DOTA-peptide PET/CT performed in a 2-month period; and the availability of a postsurgical histopathological diagnosis. | Age (mean, years): 59.7 (SD 14.0)<br>Female: 64%<br>Stage I: 49%<br>Stage II: 36%<br>Stage III/IV: 15% | N=33<br>100%                                         | Detection of pulmonary carcinoids, per-patient analysis  | 26        | -         | 7         | -         | 79% (63 to 90)                               |
| Lococo, 2015 <sup>30</sup><br>Poor | Same as above                                                                                                                                                                                                      | Same as above                                                                                          | Same as above                                        | Detection of pulmonary carcinoids, per-patient analysis  | 18        | -         | 15        | -         | 55% (38 to 71)                               |
| Morgat, 2016 <sup>31</sup><br>Fair | Genetically confirmed MEN1 patients previously evaluated and treated at authors' department                                                                                                                        | Age (mean, years): 47; range: 26-70<br>Female: 63%<br>Hyperparathyroidism: 100%                        | N=19<br>100%                                         | Detection of duodenopancreatic NETs, per-lesion analysis | 57        | 0         | 18        | 4         | 76%                                          |
| Morgat, 2016 <sup>31</sup><br>Fair | Same as above                                                                                                                                                                                                      | Same as above                                                                                          | Same as above                                        | Detection of duodenopancreatic NETs, per-lesion analysis | 15        | 2         | 60        | 2         | 20%                                          |
| Morgat, 2016 <sup>31</sup><br>Fair | Same as above                                                                                                                                                                                                      | Same as above                                                                                          | Same as above                                        | Detection of duodenopancreatic NETs, per-lesion analysis | 45        | 2         | 30        | 2         | 60%                                          |

**Table 4a. Studies of Diagnostic Accuracy of SSTR-PET for Identification of NETs**

| <b>Author, year<br/>Quality</b>    | <b>Calculated<br/>Sensitivity<br/>(95% CI)</b> | <b>Reported<br/>Specificity<br/>(95% CI)</b> | <b>Calculated<br/>Specificity<br/>(95% CI)</b> | <b>Reported PPV<br/>(95% CI)</b> | <b>Calculated PPV<br/>(95% CI)</b> | <b>Reported NPV<br/>(95% CI)</b> | <b>Calculated NPV<br/>(95% CI)</b> |
|------------------------------------|------------------------------------------------|----------------------------------------------|------------------------------------------------|----------------------------------|------------------------------------|----------------------------------|------------------------------------|
| Lococo, 2015 <sup>30</sup><br>Poor | 78.79% (61.09 to 91.02)                        | NR                                           | Unable to calculate                            | NR                               | 100.00%                            | NR                               | Unable to calculate                |
| Lococo, 2015 <sup>30</sup><br>Poor | 54.55% (36.35 to 71.89)                        | NR                                           | Unable to calculate                            | NR                               | 100% (89.42 to 100)                | NR                               | Unable to calculate                |
| Morgat, 2016 <sup>31</sup><br>Fair | 76% (64.75 to 85.11)                           | 100%                                         | 100% (39.76 to 100)                            | NR                               | 100.00%                            | NR                               | 18.18% (12.93 to 24.95)            |
| Morgat, 2016 <sup>31</sup><br>Fair | 20% (11.65 to 30.83)                           | 50%                                          | 50% (6.76 to 93.24)                            | NR                               | 88.24% (71.82 to 95.67)            | NR                               | 3.23% (1.23 to 8.21)               |
| Morgat, 2016 <sup>31</sup><br>Fair | 60% (48.04 to 71.15)                           | 50%                                          | 50% (6.76 to 93.24)                            | NR                               | 95.74% (89.25 to 98.39)            | NR                               | 6.25% (2.35 to 15.58)              |

**Table 4a. Studies of Diagnostic Accuracy of SSTR-PET for Identification of NETs**

| <b>Author, year<br/>Quality</b>    | <b>Reported<br/>AUROC</b> | <b>Calculated PLR<br/>(95% CI)</b> | <b>Reported PLR<br/>(95% CI)</b> | <b>Calculated NLR<br/>(95% CI)</b> | <b>Reported NLR<br/>(95% CI)</b> | <b>Other<br/>Measures of<br/>Diagnostic<br/>Accuracy</b> | <b>Imaging<br/>Accuracy</b> |
|------------------------------------|---------------------------|------------------------------------|----------------------------------|------------------------------------|----------------------------------|----------------------------------------------------------|-----------------------------|
| Lococo, 2015 <sup>30</sup><br>Poor | NR                        | 0.79                               | NR                               | Unable to<br>calculate             | NR                               | NR                                                       | NR                          |
| Lococo, 2015 <sup>30</sup><br>Poor | NR                        | 0.55                               | NR                               | Unable to<br>calculate             | NR                               | NR                                                       | NR                          |
| Morgat, 2016 <sup>31</sup><br>Fair | NR                        | Not able to<br>calculate           | NR                               | 0.24 (0.16 to 0.36)                | NR                               | NR                                                       | NR                          |
| Morgat, 2016 <sup>31</sup><br>Fair | NR                        | 0.40 (0.14 to 1.18)                | NR                               | 1.60 (0.60 to 4.29)                | NR                               | NR                                                       | NR                          |
| Morgat, 2016 <sup>31</sup><br>Fair | NR                        | 1.20 (0.44 to 3.25)                | NR                               | 0.80 (0.29 to 2.22)                | NR                               | NR                                                       | NR                          |

**Table 4a. Studies of Diagnostic Accuracy of SSTR-PET for Identification of NETs**

| <b>Author, year<br/>Quality</b>      | <b>Tracer</b>             | <b>Imaging Test</b> | <b>Definition of a Positive Test</b>                                                                                          | <b>Reference Standard</b>                                                                                                            | <b>Type of Study</b>        | <b>Country<br/>Setting</b>                |
|--------------------------------------|---------------------------|---------------------|-------------------------------------------------------------------------------------------------------------------------------|--------------------------------------------------------------------------------------------------------------------------------------|-----------------------------|-------------------------------------------|
| Putzer, 2009 <sup>32</sup><br>Fair   | <sup>68</sup> Ga-DOTATOC  | PET                 | Clear demarcation of the lesion, with tracer accumulation higher than that in the liver and higher than physiologic activity. | PET or SPECT bone scintigraphy with PET or MRI for discordant results; follow-up control imaging within 6 months in ~60% of patients | Retrospective               | Austria<br>Department of Nuclear Medicine |
| Putzer, 2009 <sup>32</sup><br>Fair   | Not applicable            | CT                  | Same as above                                                                                                                 | Same as above                                                                                                                        | Same as above               | Same as above                             |
| Sadowski, 2016 <sup>33</sup><br>Poor | <sup>68</sup> Ga-DOTATATE | PET/CT              | Unclear                                                                                                                       | Multidisciplinary team consensus using all imaging modalities and clinical information.                                              | Prospective cross-sectional | USA                                       |

**Table 4a. Studies of Diagnostic Accuracy of SSTR-PET for Identification of NETs**

| Author, year<br>Quality              | Inclusion Criteria                                                                                                                                                                                                                  | Population Characteristics                                                                                                                                                                                                                                                                                                                                                                                  | Sample Size<br>Proportion<br>With Condition | Analysis Method                                                 | TP  | FP | FN | TN | Reported<br>Sensitivity<br>(95% CI) |
|--------------------------------------|-------------------------------------------------------------------------------------------------------------------------------------------------------------------------------------------------------------------------------------|-------------------------------------------------------------------------------------------------------------------------------------------------------------------------------------------------------------------------------------------------------------------------------------------------------------------------------------------------------------------------------------------------------------|---------------------------------------------|-----------------------------------------------------------------|-----|----|----|----|-------------------------------------|
| Putzer, 2009 <sup>32</sup><br>Fair   | Patients with histologically confirmed NETs                                                                                                                                                                                         | Age range (years): 32-87<br>Female: 43%<br>Primary site:<br>-Stomach: 6%<br>-Small bowel: 29%<br>-Colon: 6%<br>-Rectum: 4%<br>-Anal region: 2%<br>-Pancreas: 22%<br>-Prostate gland: 2%<br>-Bronchial carcinoid: 10%<br>-Unknown: 20%                                                                                                                                                                       | N=51<br>66%                                 | Detection of bone metastases, per-patient analysis              | 37  | 1  | 1  | 12 | 97%                                 |
| Putzer, 2009 <sup>32</sup><br>Fair   | Same as above                                                                                                                                                                                                                       | Same as above                                                                                                                                                                                                                                                                                                                                                                                               | Same as above                               | Detection of bone metastases, per-patient analysis              | 22  | 0  | 16 | 13 | 58%                                 |
| Sadowski, 2016 <sup>33</sup><br>Poor | Nonpregnant patients ≥18 years old, suspected or known to have GEP NETs on imaging (CT, MRI, <sup>18</sup> F-FDG PET) and/or biochemical evidence of GEP NETs, and/or a familial predisposition to NET (MEN1 or von Hippel-Lindau). | Age (mean, years): 51; range: 19-82<br>Female: 56%<br>Patients with symptoms: 55%<br>Chromogranin A (median, ng/mL): 87.5; range: 20-18,710<br>Previous surgery: 77.5%<br>-Pancreatic NET: 44.9%<br>-Gastro-enteric NET: 55.1%<br>Prior proven NET<br>-Pancreatic: 27.5%<br>-Small/large bowel: 23.7%/3.0%<br>-Insulinoma: 5.3%<br>-Gastic: 5.3%<br>-Thymic carcinoid: 0.8%<br>-Vipoma: 1.5%<br>-Lung: 0.8% | N=131<br>82%                                | Detection of gastro-entero-pancreatic NETs, per-lesion analysis | 847 | NR | 44 | NR | 95.1% (92.4 to 96.8)                |



**Table 4a. Studies of Diagnostic Accuracy of SSTR-PET for Identification of NETs**

| <b>Author, year<br/>Quality</b>      | <b>Calculated<br/>Sensitivity<br/>(95% CI)</b> | <b>Reported<br/>Specificity<br/>(95% CI)</b> | <b>Calculated<br/>Specificity<br/>(95% CI)</b> | <b>Reported PPV<br/>(95% CI)</b> | <b>Calculated PPV<br/>(95% CI)</b> | <b>Reported NPV<br/>(95% CI)</b> | <b>Calculated NPV<br/>(95% CI)</b> |
|--------------------------------------|------------------------------------------------|----------------------------------------------|------------------------------------------------|----------------------------------|------------------------------------|----------------------------------|------------------------------------|
| Putzer, 2009 <sup>32</sup><br>Fair   | 97.37% (86.19 to 99.93)                        | 92%                                          | 92.31% (63.97 to 99.81)                        | NR                               | 97.37% (84.90 to 99.59)            | NR                               | 92.31% (63.29 to 98.82)            |
| Putzer, 2009 <sup>32</sup><br>Fair   | 57.89% (40.82 to 73.69)                        | 100%                                         | 100% (75.29 to 100)                            | NR                               | 100.00%                            | NR                               | 44.83% (35.88 to 54.12)            |
| Sadowski, 2016 <sup>33</sup><br>Poor | Unable to calculate                            | NR                                           | Unable to calculate                            | NR                               | Unable to calculate                | NR                               | Unable to calculate                |

**Table 4a. Studies of Diagnostic Accuracy of SSTR-PET for Identification of NETs**

| <b>Author, year<br/>Quality</b>      | <b>Reported<br/>AUROC</b> | <b>Calculated PLR<br/>(95% CI)</b> | <b>Reported PLR<br/>(95% CI)</b> | <b>Calculated NLR<br/>(95% CI)</b> | <b>Reported NLR<br/>(95% CI)</b> | <b>Other<br/>Measures of<br/>Diagnostic<br/>Accuracy</b> | <b>Imaging<br/>Accuracy</b> |
|--------------------------------------|---------------------------|------------------------------------|----------------------------------|------------------------------------|----------------------------------|----------------------------------------------------------|-----------------------------|
| Putzer, 2009 <sup>32</sup><br>Fair   | NR                        | 12.66 (1.92 to<br>83.27)           | NR                               | 0.03 (0.00 to 0.20)                | NR                               | NR                                                       | NR                          |
| Putzer, 2009 <sup>32</sup><br>Fair   | NR                        | Unable to<br>calculate             | NR                               | 0.42 (0.29 to 0.61)                | NR                               | NR                                                       | NR                          |
| Sadowski, 2016 <sup>33</sup><br>Poor | NR                        | Unable to<br>calculate             | NR                               | Unable to<br>calculate             | NR                               | NR                                                       | NR                          |

**Table 4a. Studies of Diagnostic Accuracy of SSTR-PET for Identification of NETs**

| <b>Author, year<br/>Quality</b>      | <b>Tracer</b>                   | <b>Imaging Test</b> | <b>Definition of a Positive Test</b> | <b>Reference Standard</b> | <b>Type of Study</b> | <b>Country<br/>Setting</b> |
|--------------------------------------|---------------------------------|---------------------|--------------------------------------|---------------------------|----------------------|----------------------------|
| Sadowski, 2016 <sup>33</sup><br>Poor | <sup>111</sup> In-Pentetreotide | SPECT/CT            | Unclear                              | Same as above             | Same as above        | Same as above              |
| Sadowski, 2016 <sup>33</sup><br>Poor | Not applicable                  | CT and/or MRI       | Unclear                              | Same as above             | Same as above        | Same as above              |
| Sadowski, 2016 <sup>33</sup><br>Poor | <sup>68</sup> Ga-DOTATATE       | PET/CT              | Unclear                              | Same as above             | Same as above        | Same as above              |
| Sadowski, 2016 <sup>33</sup><br>Poor | <sup>111</sup> In-Pentetreotide | SPECT/CT            | Unclear                              | Same as above             | Same as above        | Same as above              |
| Sadowski, 2016 <sup>33</sup><br>Poor | Not applicable                  | CT and/or MRI       | Unclear                              | Same as above             | Same as above        | Same as above              |
| Sadowski, 2016 <sup>33</sup><br>Poor | <sup>68</sup> Ga-DOTATATE       | PET/CT              | Unclear                              | Same as above             | Same as above        | Same as above              |
| Sadowski, 2016 <sup>33</sup><br>Poor | <sup>111</sup> In-Pentetreotide | SPECT/CT            | Unclear                              | Same as above             | Same as above        | Same as above              |
| Sadowski, 2016 <sup>33</sup><br>Poor | Not applicable                  | CT and/or MRI       | Unclear                              | Same as above             | Same as above        | Same as above              |
| Sadowski, 2016 <sup>33</sup><br>Poor | <sup>68</sup> Ga-DOTATATE       | PET/CT              | Unclear                              | Same as above             | Same as above        | Same as above              |
| Sadowski, 2016 <sup>33</sup><br>Poor | <sup>111</sup> In-Pentetreotide | SPECT/CT            | Unclear                              | Same as above             | Same as above        | Same as above              |
| Sadowski, 2016 <sup>33</sup><br>Poor | Not applicable                  | CT and/or MRI       | Unclear                              | Same as above             | Same as above        | Same as above              |
| Sadowski, 2016 <sup>33</sup><br>Poor | <sup>68</sup> Ga-DOTATATE       | PET/CT              | Unclear                              | Same as above             | Same as above        | Same as above              |

**Table 4a. Studies of Diagnostic Accuracy of SSTR-PET for Identification of NETs**

| <b>Author, year<br/>Quality</b>      | <b>Inclusion Criteria</b> | <b>Population Characteristics</b> | <b>Sample Size<br/>Proportion<br/>With Condition</b> | <b>Analysis Method</b>                            | <b>TP</b> | <b>FP</b> | <b>FN</b> | <b>TN</b> | <b>Reported<br/>Sensitivity<br/>(95% CI)</b> |
|--------------------------------------|---------------------------|-----------------------------------|------------------------------------------------------|---------------------------------------------------|-----------|-----------|-----------|-----------|----------------------------------------------|
| Sadowski, 2016 <sup>33</sup><br>Poor | Same as above             | Same as above                     | Same as above                                        | Detection of GEP NETs, per-lesion analysis        | 275       | NR        | 44        | NR        | 30.9% (25.0 to 37.5)                         |
| Sadowski, 2016 <sup>33</sup><br>Poor | Same as above             | Same as above                     | Same as above                                        | Detection of GEP NETs, per-lesion analysis        | 404       | NR        | 487       | NR        | 45.3% (37.9 to 52.9)                         |
| Sadowski, 2016 <sup>33</sup><br>Poor | Same as above             | Same as above                     | Same as above                                        | Detection of GEP NETs in the pancreas             | 105       | NR        | 5         | NR        | 95.5% (89.4 to 98.1)                         |
| Sadowski, 2016 <sup>33</sup><br>Poor | Same as above             | Same as above                     | Same as above                                        | Detection of GEP NETs in the pancreas             | 22        | NR        | 88        | NR        | 20% (12.8 to 29.8)                           |
| Sadowski, 2016 <sup>33</sup><br>Poor | Same as above             | Same as above                     | Same as above                                        | Detection of GEP NETs in the pancreas             | 59        | NR        | 51        | NR        | 53.6% (42.8 to 64.2)                         |
| Sadowski, 2016 <sup>33</sup><br>Poor | Same as above             | Same as above                     | Same as above                                        | Detection of GEP NETs in the liver                | 396       | NR        | 12        | NR        | 97.1% (93.7 to 98.7)                         |
| Sadowski, 2016 <sup>33</sup><br>Poor | Same as above             | Same as above                     | Same as above                                        | Detection of GEP NETs in the liver                | 170       | NR        | 238       | NR        | 41.7% (31.1 to 53.1)                         |
| Sadowski, 2016 <sup>33</sup><br>Poor | Same as above             | Same as above                     | Same as above                                        | Detection of GEP NETs in the liver                | 233       | NR        | 175       | NR        | 57.1% (44.7 to 68.7)                         |
| Sadowski, 2016 <sup>33</sup><br>Poor | Same as above             | Same as above                     | Same as above                                        | Detection of GEP NETs in the bowel                | 49        | NR        | 2         | NR        | 96.1% (75.9 to 99.5)                         |
| Sadowski, 2016 <sup>33</sup><br>Poor | Same as above             | Same as above                     | Same as above                                        | Detection of GEP NETs in the bowel                | 7         | NR        | 44        | NR        | 13.7% (5.4 to 30.7)                          |
| Sadowski, 2016 <sup>33</sup><br>Poor | Same as above             | Same as above                     | Same as above                                        | Detection of GEP NETs in the bowel                | 6         | NR        | 45        | NR        | 11.8% (3.6 to 32.6)                          |
| Sadowski, 2016 <sup>33</sup><br>Poor | Same as above             | Same as above                     | Same as above                                        | Detection of GEP NETs in the lung and mediastinum | 30        | NR        | 10        | NR        | 75% (54.4 to 88.3)                           |

**Table 4a. Studies of Diagnostic Accuracy of SSTR-PET for Identification of NETs**

| <b>Author, year<br/>Quality</b>      | <b>Calculated<br/>Sensitivity<br/>(95% CI)</b> | <b>Reported<br/>Specificity<br/>(95% CI)</b> | <b>Calculated<br/>Specificity<br/>(95% CI)</b> | <b>Reported PPV<br/>(95% CI)</b> | <b>Calculated PPV<br/>(95% CI)</b> | <b>Reported NPV<br/>(95% CI)</b> | <b>Calculated NPV<br/>(95% CI)</b> |
|--------------------------------------|------------------------------------------------|----------------------------------------------|------------------------------------------------|----------------------------------|------------------------------------|----------------------------------|------------------------------------|
| Sadowski, 2016 <sup>33</sup><br>Poor | Unable to<br>calculate                         | NR                                           | Unable to<br>calculate                         | NR                               | Unable to<br>calculate             | NR                               | Unable to<br>calculate             |
| Sadowski, 2016 <sup>33</sup><br>Poor | Unable to<br>calculate                         | NR                                           | Unable to<br>calculate                         | NR                               | Unable to<br>calculate             | NR                               | Unable to<br>calculate             |
| Sadowski, 2016 <sup>33</sup><br>Poor | Unable to<br>calculate                         | NR                                           | Unable to<br>calculate                         | NR                               | Unable to<br>calculate             | NR                               | Unable to<br>calculate             |
| Sadowski, 2016 <sup>33</sup><br>Poor | Unable to<br>calculate                         | NR                                           | Unable to<br>calculate                         | NR                               | Unable to<br>calculate             | NR                               | Unable to<br>calculate             |
| Sadowski, 2016 <sup>33</sup><br>Poor | Unable to<br>calculate                         | NR                                           | Unable to<br>calculate                         | NR                               | Unable to<br>calculate             | NR                               | Unable to<br>calculate             |
| Sadowski, 2016 <sup>33</sup><br>Poor | Unable to<br>calculate                         | NR                                           | Unable to<br>calculate                         | NR                               | Unable to<br>calculate             | NR                               | Unable to<br>calculate             |
| Sadowski, 2016 <sup>33</sup><br>Poor | Unable to<br>calculate                         | NR                                           | Unable to<br>calculate                         | NR                               | Unable to<br>calculate             | NR                               | Unable to<br>calculate             |
| Sadowski, 2016 <sup>33</sup><br>Poor | Unable to<br>calculate                         | NR                                           | Unable to<br>calculate                         | NR                               | Unable to<br>calculate             | NR                               | Unable to<br>calculate             |
| Sadowski, 2016 <sup>33</sup><br>Poor | Unable to<br>calculate                         | NR                                           | Unable to<br>calculate                         | NR                               | Unable to<br>calculate             | NR                               | Unable to<br>calculate             |
| Sadowski, 2016 <sup>33</sup><br>Poor | Unable to<br>calculate                         | NR                                           | Unable to<br>calculate                         | NR                               | Unable to<br>calculate             | NR                               | Unable to<br>calculate             |
| Sadowski, 2016 <sup>33</sup><br>Poor | Unable to<br>calculate                         | NR                                           | Unable to<br>calculate                         | NR                               | Unable to<br>calculate             | NR                               | Unable to<br>calculate             |
| Sadowski, 2016 <sup>33</sup><br>Poor | Unable to<br>calculate                         | NR                                           | Unable to<br>calculate                         | NR                               | Unable to<br>calculate             | NR                               | Unable to<br>calculate             |
| Sadowski, 2016 <sup>33</sup><br>Poor | Unable to<br>calculate                         | NR                                           | Unable to<br>calculate                         | NR                               | Unable to<br>calculate             | NR                               | Unable to<br>calculate             |

**Table 4a. Studies of Diagnostic Accuracy of SSTR-PET for Identification of NETs**

| <b>Author, year<br/>Quality</b>      | <b>Reported<br/>AUROC</b> | <b>Calculated PLR<br/>(95% CI)</b> | <b>Reported PLR<br/>(95% CI)</b> | <b>Calculated NLR<br/>(95% CI)</b> | <b>Reported NLR<br/>(95% CI)</b> | <b>Other<br/>Measures of<br/>Diagnostic<br/>Accuracy</b> | <b>Imaging<br/>Accuracy</b> |
|--------------------------------------|---------------------------|------------------------------------|----------------------------------|------------------------------------|----------------------------------|----------------------------------------------------------|-----------------------------|
| Sadowski, 2016 <sup>33</sup><br>Poor | NR                        | Unable to<br>calculate             | NR                               | Unable to<br>calculate             | NR                               | NR                                                       | NR                          |
| Sadowski, 2016 <sup>33</sup><br>Poor | NR                        | Unable to<br>calculate             | NR                               | Unable to<br>calculate             | NR                               | NR                                                       | NR                          |
| Sadowski, 2016 <sup>33</sup><br>Poor | NR                        | Unable to<br>calculate             | NR                               | Unable to<br>calculate             | NR                               | NR                                                       | NR                          |
| Sadowski, 2016 <sup>33</sup><br>Poor | NR                        | Unable to<br>calculate             | NR                               | Unable to<br>calculate             | NR                               | NR                                                       | NR                          |
| Sadowski, 2016 <sup>33</sup><br>Poor | NR                        | Unable to<br>calculate             | NR                               | Unable to<br>calculate             | NR                               | NR                                                       | NR                          |
| Sadowski, 2016 <sup>33</sup><br>Poor | NR                        | Unable to<br>calculate             | NR                               | Unable to<br>calculate             | NR                               | NR                                                       | NR                          |
| Sadowski, 2016 <sup>33</sup><br>Poor | NR                        | Unable to<br>calculate             | NR                               | Unable to<br>calculate             | NR                               | NR                                                       | NR                          |
| Sadowski, 2016 <sup>33</sup><br>Poor | NR                        | Unable to<br>calculate             | NR                               | Unable to<br>calculate             | NR                               | NR                                                       | NR                          |
| Sadowski, 2016 <sup>33</sup><br>Poor | NR                        | Unable to<br>calculate             | NR                               | Unable to<br>calculate             | NR                               | NR                                                       | NR                          |
| Sadowski, 2016 <sup>33</sup><br>Poor | NR                        | Unable to<br>calculate             | NR                               | Unable to<br>calculate             | NR                               | NR                                                       | NR                          |
| Sadowski, 2016 <sup>33</sup><br>Poor | NR                        | Unable to<br>calculate             | NR                               | Unable to<br>calculate             | NR                               | NR                                                       | NR                          |
| Sadowski, 2016 <sup>33</sup><br>Poor | NR                        | Unable to<br>calculate             | NR                               | Unable to<br>calculate             | NR                               | NR                                                       | NR                          |
| Sadowski, 2016 <sup>33</sup><br>Poor | NR                        | Unable to<br>calculate             | NR                               | Unable to<br>calculate             | NR                               | NR                                                       | NR                          |

**Table 4a. Studies of Diagnostic Accuracy of SSTR-PET for Identification of NETs**

| <b>Author, year<br/>Quality</b>      | <b>Tracer</b>                   | <b>Imaging Test</b> | <b>Definition of a Positive Test</b> | <b>Reference Standard</b> | <b>Type of Study</b> | <b>Country<br/>Setting</b> |
|--------------------------------------|---------------------------------|---------------------|--------------------------------------|---------------------------|----------------------|----------------------------|
| Sadowski, 2016 <sup>33</sup><br>Poor | <sup>111</sup> In-Pentetreotide | SPECT/CT            | Unclear                              | Same as above             | Same as above        | Same as above              |
| Sadowski, 2016 <sup>33</sup><br>Poor | Not applicable                  | CT and/or MRI       | Unclear                              | Same as above             | Same as above        | Same as above              |
| Sadowski, 2016 <sup>33</sup><br>Poor | <sup>68</sup> Ga-DOTATATE       | PET/CT              | Unclear                              | Same as above             | Same as above        | Same as above              |
| Sadowski, 2016 <sup>33</sup><br>Poor | <sup>111</sup> In-Pentetreotide | SPECT/CT            | Unclear                              | Same as above             | Same as above        | Same as above              |
| Sadowski, 2016 <sup>33</sup><br>Poor | Not applicable                  | CT and/or MRI       | Unclear                              | Same as above             | Same as above        | Same as above              |
| Sadowski, 2016 <sup>33</sup><br>Poor | <sup>68</sup> Ga-DOTATATE       | PET/CT              | Unclear                              | Same as above             | Same as above        | Same as above              |
| Sadowski, 2016 <sup>33</sup><br>Poor | <sup>111</sup> In-Pentetreotide | SPECT/CT            | Unclear                              | Same as above             | Same as above        | Same as above              |
| Sadowski, 2016 <sup>33</sup><br>Poor | Not applicable                  | CT and/or MRI       | Unclear                              | Same as above             | Same as above        | Same as above              |

**Table 4a. Studies of Diagnostic Accuracy of SSTR-PET for Identification of NETs**

| <b>Author, year<br/>Quality</b>      | <b>Inclusion Criteria</b> | <b>Population Characteristics</b> | <b>Sample Size<br/>Proportion<br/>With Condition</b> | <b>Analysis Method</b>                                                       | <b>TP</b> | <b>FP</b> | <b>FN</b> | <b>TN</b> | <b>Reported<br/>Sensitivity<br/>(95% CI)</b> |
|--------------------------------------|---------------------------|-----------------------------------|------------------------------------------------------|------------------------------------------------------------------------------|-----------|-----------|-----------|-----------|----------------------------------------------|
| Sadowski, 2016 <sup>33</sup><br>Poor | Same as above             | Same as above                     | Same as above                                        | Detection of GEP NETs<br>in the lung and<br>mediastinum                      | 16        | NR        | 24        | NR        | 40% (25.3 to<br>56.7)                        |
| Sadowski, 2016 <sup>33</sup><br>Poor | Same as above             | Same as above                     | Same as above                                        | Detection of GEP NETs<br>in the lung and<br>mediastinum                      | 30        | NR        | 10        | NR        | 75% (53.0 to<br>88.9)                        |
| Sadowski, 2016 <sup>33</sup><br>Poor | Same as above             | Same as above                     | Same as above                                        | Detection of GEP NETs<br>in the abdomen and<br>retroperitoneal lymph<br>node | 144       | NR        | 9         | NR        | 94.1% (87.1 to<br>97.4)                      |
| Sadowski, 2016 <sup>33</sup><br>Poor | Same as above             | Same as above                     | Same as above                                        | Detection of GEP NETs<br>in the abdomen and<br>retroperitoneal lymph<br>node | 41        | NR        | 112       | NR        | 26.8% (16.6 to<br>40.2)                      |
| Sadowski, 2016 <sup>33</sup><br>Poor | Same as above             | Same as above                     | Same as above                                        | Detection of GEP NETs<br>in the abdomen and<br>retroperitoneal lymph<br>node | 60        | NR        | 93        | NR        | 39.2% (29.7 to<br>49.6)                      |
| Sadowski, 2016 <sup>33</sup><br>Poor | Same as above             | Same as above                     | Same as above                                        | Detection of GEP NETs<br>in the bone                                         | 123       | NR        | 6         | NR        | 95.3% (82.5 to<br>98.9)                      |
| Sadowski, 2016 <sup>33</sup><br>Poor | Same as above             | Same as above                     | Same as above                                        | Detection of GEP NETs<br>in the bone                                         | 19        | NR        | 110       | NR        | 14.7% (6.4 to<br>30.6)                       |
| Sadowski, 2016 <sup>33</sup><br>Poor | Same as above             | Same as above                     | Same as above                                        | Detection of GEP NETs<br>in the bone                                         | 16        | NR        | 113       | NR        | 12.4% (7.3 to<br>20.3)                       |



**Table 4a. Studies of Diagnostic Accuracy of SSTR-PET for Identification of NETs**

| <b>Author, year<br/>Quality</b>      | <b>Calculated<br/>Sensitivity<br/>(95% CI)</b> | <b>Reported<br/>Specificity<br/>(95% CI)</b> | <b>Calculated<br/>Specificity<br/>(95% CI)</b> | <b>Reported PPV<br/>(95% CI)</b> | <b>Calculated PPV<br/>(95% CI)</b> | <b>Reported NPV<br/>(95% CI)</b> | <b>Calculated NPV<br/>(95% CI)</b> |
|--------------------------------------|------------------------------------------------|----------------------------------------------|------------------------------------------------|----------------------------------|------------------------------------|----------------------------------|------------------------------------|
| Sadowski, 2016 <sup>33</sup><br>Poor | Unable to<br>calculate                         | NR                                           | Unable to<br>calculate                         | NR                               | Unable to<br>calculate             | NR                               | Unable to<br>calculate             |
| Sadowski, 2016 <sup>33</sup><br>Poor | Unable to<br>calculate                         | NR                                           | Unable to<br>calculate                         | NR                               | Unable to<br>calculate             | NR                               | Unable to<br>calculate             |
| Sadowski, 2016 <sup>33</sup><br>Poor | Unable to<br>calculate                         | NR                                           | Unable to<br>calculate                         | NR                               | Unable to<br>calculate             | NR                               | Unable to<br>calculate             |
| Sadowski, 2016 <sup>33</sup><br>Poor | Unable to<br>calculate                         | NR                                           | Unable to<br>calculate                         | NR                               | Unable to<br>calculate             | NR                               | Unable to<br>calculate             |
| Sadowski, 2016 <sup>33</sup><br>Poor | Unable to<br>calculate                         | NR                                           | Unable to<br>calculate                         | NR                               | Unable to<br>calculate             | NR                               | Unable to<br>calculate             |
| Sadowski, 2016 <sup>33</sup><br>Poor | Unable to<br>calculate                         | NR                                           | Unable to<br>calculate                         | NR                               | Unable to<br>calculate             | NR                               | Unable to<br>calculate             |
| Sadowski, 2016 <sup>33</sup><br>Poor | Unable to<br>calculate                         | NR                                           | Unable to<br>calculate                         | NR                               | Unable to<br>calculate             | NR                               | Unable to<br>calculate             |
| Sadowski, 2016 <sup>33</sup><br>Poor | Unable to<br>calculate                         | NR                                           | Unable to<br>calculate                         | NR                               | Unable to<br>calculate             | NR                               | Unable to<br>calculate             |

**Table 4a. Studies of Diagnostic Accuracy of SSTR-PET for Identification of NETs**

| <b>Author, year<br/>Quality</b>      | <b>Reported<br/>AUROC</b> | <b>Calculated PLR<br/>(95% CI)</b> | <b>Reported PLR<br/>(95% CI)</b> | <b>Calculated NLR<br/>(95% CI)</b> | <b>Reported NLR<br/>(95% CI)</b> | <b>Other<br/>Measures of<br/>Diagnostic<br/>Accuracy</b> | <b>Imaging<br/>Accuracy</b> |
|--------------------------------------|---------------------------|------------------------------------|----------------------------------|------------------------------------|----------------------------------|----------------------------------------------------------|-----------------------------|
| Sadowski, 2016 <sup>33</sup><br>Poor | NR                        | Unable to<br>calculate             | NR                               | Unable to<br>calculate             | NR                               | NR                                                       | NR                          |
| Sadowski, 2016 <sup>33</sup><br>Poor | NR                        | Unable to<br>calculate             | NR                               | Unable to<br>calculate             | NR                               | NR                                                       | NR                          |
| Sadowski, 2016 <sup>33</sup><br>Poor | NR                        | Unable to<br>calculate             | NR                               | Unable to<br>calculate             | NR                               | NR                                                       | NR                          |
| Sadowski, 2016 <sup>33</sup><br>Poor | NR                        | Unable to<br>calculate             | NR                               | Unable to<br>calculate             | NR                               | NR                                                       | NR                          |
| Sadowski, 2016 <sup>33</sup><br>Poor | NR                        | Unable to<br>calculate             | NR                               | Unable to<br>calculate             | NR                               | NR                                                       | NR                          |
| Sadowski, 2016 <sup>33</sup><br>Poor | NR                        | Unable to<br>calculate             | NR                               | Unable to<br>calculate             | NR                               | NR                                                       | NR                          |
| Sadowski, 2016 <sup>33</sup><br>Poor | NR                        | Unable to<br>calculate             | NR                               | Unable to<br>calculate             | NR                               | NR                                                       | NR                          |
| Sadowski, 2016 <sup>33</sup><br>Poor | NR                        | Unable to<br>calculate             | NR                               | Unable to<br>calculate             | NR                               | NR                                                       | NR                          |

**Table 4a. Studies of Diagnostic Accuracy of SSTR-PET for Identification of NETs**

| <b>Author, year<br/>Quality</b>     | <b>Tracer</b>            | <b>Imaging Test</b> | <b>Definition of a Positive Test</b>                                                                                                                                                                                                                                                                   | <b>Reference Standard</b>                                                                                                                                    | <b>Type of Study</b> | <b>Country<br/>Setting</b> |
|-------------------------------------|--------------------------|---------------------|--------------------------------------------------------------------------------------------------------------------------------------------------------------------------------------------------------------------------------------------------------------------------------------------------------|--------------------------------------------------------------------------------------------------------------------------------------------------------------|----------------------|----------------------------|
| Schraml, 2013 <sup>34</sup><br>Fair | <sup>68</sup> Ga-DOTATOC | PET/CT              | In PET images, focal uptake exceeding normal regional tracer accumulation was classified as a malignant lesion. This was combined with the CT assessment using standard reading criteria established in clinical practice by taking into account morphologic features and enhancement characteristics. | Consensus decision based on correlation of all available image data, histologic, and surgical findings were available, and clinical follow-up of ≥12 months. | Prospective cohort   | Germany                    |
| Schraml, 2013 <sup>34</sup><br>Fair | Not applicable           | MRI                 | Based on standard reading criteria established in clinical practice by taking into account morphologic features and enhancement characteristics.                                                                                                                                                       | Same as above                                                                                                                                                | Same as above        | Same as above              |
| Schraml, 2013 <sup>34</sup><br>Fair | <sup>68</sup> Ga-DOTATOC | PET                 | In PET images, focal uptake exceeding normal regional tracer accumulation was classified as a malignant lesion.                                                                                                                                                                                        | Same as above                                                                                                                                                | Same as above        | Same as above              |
| Schraml, 2013 <sup>34</sup><br>Fair | Not applicable           | CT                  | Based on standard reading criteria established in clinical practice by taking into account morphologic features and enhancement characteristics.                                                                                                                                                       | Same as above                                                                                                                                                | Same as above        | Same as above              |

**Table 4a. Studies of Diagnostic Accuracy of SSTR-PET for Identification of NETs**

| <b>Author, year<br/>Quality</b>     | <b>Inclusion Criteria</b>                                                   | <b>Population Characteristics</b>                                                                                                                                                                                                                             | <b>Sample Size<br/>Proportion<br/>With Condition</b> | <b>Analysis Method</b>                                | <b>TP</b> | <b>FP</b> | <b>FN</b> | <b>TN</b> | <b>Reported<br/>Sensitivity<br/>(95% CI)</b> |
|-------------------------------------|-----------------------------------------------------------------------------|---------------------------------------------------------------------------------------------------------------------------------------------------------------------------------------------------------------------------------------------------------------|------------------------------------------------------|-------------------------------------------------------|-----------|-----------|-----------|-----------|----------------------------------------------|
| Schraml, 2013 <sup>34</sup><br>Fair | Patients with histologically proven NET and suspicion of metastatic spread. | Age (mean, years): 57<br>Female: 49%<br>Primary tumor site:<br>-Gastroenteropancreatic system: 63%<br>-Thyroid: 4%<br>-Bronchopulmonary system: 4%<br>-Thymus: 4%<br>-Cervix: 4%<br>-Parotid gland: 2%<br>-Cranium: 2%<br>-Adrenal gland: 2%<br>-Unknown: 15% | N=51<br>80% (41/51)                                  | Detection of metastatic disease, per-patient analysis | 40        | 0         | 1         | 10        | 98% (87 to 100)                              |
| Schraml, 2013 <sup>34</sup><br>Fair | Same as above                                                               | Same as above                                                                                                                                                                                                                                                 | Same as above                                        | Detection of metastatic disease, per-patient analysis | 40        | 1         | 1         | 9         | 98% (87 to 100)                              |
| Schraml, 2013 <sup>34</sup><br>Fair | Same as above                                                               | Same as above                                                                                                                                                                                                                                                 | Same as above                                        | Detection of metastatic disease, per-patient analysis | 36        | 1         | 5         | 9         | 88% (74 to 96)                               |
| Schraml, 2013 <sup>34</sup><br>Fair | Same as above                                                               | Same as above                                                                                                                                                                                                                                                 | Same as above                                        | Detection of metastatic disease, per-patient analysis | 37        | 1         | 4         | 9         | 90% (77 to 97)                               |

**Table 4a. Studies of Diagnostic Accuracy of SSTR-PET for Identification of NETs**

| <b>Author, year<br/>Quality</b>     | <b>Calculated<br/>Sensitivity<br/>(95% CI)</b> | <b>Reported<br/>Specificity<br/>(95% CI)</b> | <b>Calculated<br/>Specificity<br/>(95% CI)</b> | <b>Reported PPV<br/>(95% CI)</b> | <b>Calculated PPV<br/>(95% CI)</b> | <b>Reported NPV<br/>(95% CI)</b> | <b>Calculated NPV<br/>(95% CI)</b> |
|-------------------------------------|------------------------------------------------|----------------------------------------------|------------------------------------------------|----------------------------------|------------------------------------|----------------------------------|------------------------------------|
| Schraml, 2013 <sup>34</sup><br>Fair | 97.56% (87.14 to 99.94)                        | 100% (69 to 100)                             | 100% (69.15 to 100)                            | NR                               | 100.00%                            | NR                               | 90.91% (59.06 to 98.58)            |
| Schraml, 2013 <sup>34</sup><br>Fair | 97.56% (87.14 to 99.94)                        | 90% (56 to 100)                              | 90% (55.50 to 99.75)                           | NR                               | 97.56% (86.16 to 99.61)            | NR                               | 90.00% (56.22 to 98.44)            |
| Schraml, 2013 <sup>34</sup><br>Fair | 87.80% (73.80 to 95.92)                        | 90% (56 to 100)                              | 90.00% (55.50 to 99.75)                        | NR                               | 97.30% (84.82 to 99.57)            | NR                               | 64.29% (43.56 to 80.76)            |
| Schraml, 2013 <sup>34</sup><br>Fair | 90.24% (76.87 to 97.28)                        | 90% (56 to 100)                              | 90.00% (55.50 to 99.75)                        | NR                               | 97.37% (85.18 to 99.58)            | NR                               | 69.23% (46.44 to 85.38)            |

**Table 4a. Studies of Diagnostic Accuracy of SSTR-PET for Identification of NETs**

| <b>Author, year<br/>Quality</b>     | <b>Reported<br/>AUROC</b> | <b>Calculated PLR<br/>(95% CI)</b> | <b>Reported PLR<br/>(95% CI)</b> | <b>Calculated NLR<br/>(95% CI)</b> | <b>Reported NLR<br/>(95% CI)</b> | <b>Other<br/>Measures of<br/>Diagnostic<br/>Accuracy</b> | <b>Imaging<br/>Accuracy</b> |
|-------------------------------------|---------------------------|------------------------------------|----------------------------------|------------------------------------|----------------------------------|----------------------------------------------------------|-----------------------------|
| Schraml, 2013 <sup>34</sup><br>Fair | NR                        | Unable to<br>calculate             | NR                               | 0.02 (0.00 to 0.17)                | NR                               | NR                                                       | 98% (90 to 100)             |
| Schraml, 2013 <sup>34</sup><br>Fair | NR                        | 9.76 (1.52 to<br>62.67)            | NR                               | 0.03 (0.00 to 0.19)                | NR                               | NR                                                       | 96% (87 to<br>100)s         |
| Schraml, 2013 <sup>34</sup><br>Fair | NR                        | 8.78 (1.36 to<br>56.57)            | NR                               | 0.14 (0.06 to 0.32)                | NR                               | NR                                                       | 88% (76 to 96)              |
| Schraml, 2013 <sup>34</sup><br>Fair | NR                        | 9.02 (1.40 to<br>58.09)            | NR                               | 0.11 (0.04 to 0.28)                | NR                               | NR                                                       | 90% (76 to 96)              |

**Table 4a. Studies of Diagnostic Accuracy of SSTR-PET for Identification of NETs**

| <b>Author, year<br/>Quality</b>     | <b>Tracer</b>            | <b>Imaging Test</b> | <b>Definition of a Positive Test</b>                                                                                                                                                                                                                                                                   | <b>Reference Standard</b> | <b>Type of Study</b> | <b>Country<br/>Setting</b> |
|-------------------------------------|--------------------------|---------------------|--------------------------------------------------------------------------------------------------------------------------------------------------------------------------------------------------------------------------------------------------------------------------------------------------------|---------------------------|----------------------|----------------------------|
| Schraml, 2013 <sup>34</sup><br>Fair | <sup>68</sup> Ga-DOTATOC | PET/CT              | In PET images, focal uptake exceeding normal regional tracer accumulation was classified as a malignant lesion. This was combined with the CT assessment using standard reading criteria established in clinical practice by taking into account morphologic features and enhancement characteristics. | Same as above             | Same as above        | Same as above              |
| Schraml, 2013 <sup>34</sup><br>Fair | Not applicable           | MRI                 | Based on standard reading criteria established in clinical practice by taking into account morphologic features and enhancement characteristics.                                                                                                                                                       | Same as above             | Same as above        | Same as above              |
| Schraml, 2013 <sup>34</sup><br>Fair | <sup>68</sup> Ga-DOTATOC | PET                 | In PET images, focal uptake exceeding normal regional tracer accumulation was classified as a malignant lesion.                                                                                                                                                                                        | Same as above             | Same as above        | Same as above              |
| Schraml, 2013 <sup>34</sup><br>Fair | Not applicable           | CT                  | Based on standard reading criteria established in clinical practice by taking into account morphologic features and enhancement characteristics.                                                                                                                                                       | Same as above             | Same as above        | Same as above              |
| Schraml, 2013 <sup>34</sup><br>Fair | <sup>68</sup> Ga-DOTATOC | PET/CT              | In PET images, focal uptake exceeding normal regional tracer accumulation was classified as a malignant lesion. This was combined with the CT assessment using standard reading criteria established in clinical practice by taking into account morphologic features and enhancement characteristics. | Same as above             | Same as above        | Same as above              |

**Table 4a. Studies of Diagnostic Accuracy of SSTR-PET for Identification of NETs**

| <b>Author, year<br/>Quality</b>     | <b>Inclusion Criteria</b> | <b>Population Characteristics</b> | <b>Sample Size<br/>Proportion<br/>With Condition</b> | <b>Analysis Method</b>                                            | <b>TP</b> | <b>FP</b> | <b>FN</b> | <b>TN</b> | <b>Reported<br/>Sensitivity<br/>(95% CI)</b> |
|-------------------------------------|---------------------------|-----------------------------------|------------------------------------------------------|-------------------------------------------------------------------|-----------|-----------|-----------|-----------|----------------------------------------------|
| Schraml, 2013 <sup>34</sup><br>Fair | Same as above             | Same as above                     | Same as above                                        | Detection of metastatic disease, per-lesion analysis              | 545       | 7         | 48        | 10        | 92% (89 to 94)                               |
| Schraml, 2013 <sup>34</sup><br>Fair | Same as above             | Same as above                     | Same as above                                        | Detection of metastatic disease, per-lesion analysis              | 540       | 53        | 53        | 9         | 91% (88 to 93)                               |
| Schraml, 2013 <sup>34</sup><br>Fair | Same as above             | Same as above                     | Same as above                                        | Detection of metastatic disease, per-lesion analysis              | 381       | 9         | 212       | 9         | 64% (60 to 68)                               |
| Schraml, 2013 <sup>34</sup><br>Fair | Same as above             | Same as above                     | Same as above                                        | Detection of metastatic disease, per-lesion analysis              | 481       | 43        | 111       | 9         | 81% (78 to 84)                               |
| Schraml, 2013 <sup>34</sup><br>Fair | Same as above             | Same as above                     | Same as above                                        | Detection of metastatic disease in the lungs, per-lesion analysis | 54        | 0         | 0         | -         | 100% (93 to 100)                             |



**Table 4a. Studies of Diagnostic Accuracy of SSTR-PET for Identification of NETs**

| <b>Author, year<br/>Quality</b>     | <b>Calculated<br/>Sensitivity<br/>(95% CI)</b> | <b>Reported<br/>Specificity<br/>(95% CI)</b> | <b>Calculated<br/>Specificity<br/>(95% CI)</b> | <b>Reported PPV<br/>(95% CI)</b> | <b>Calculated PPV<br/>(95% CI)</b> | <b>Reported NPV<br/>(95% CI)</b> | <b>Calculated NPV<br/>(95% CI)</b> |
|-------------------------------------|------------------------------------------------|----------------------------------------------|------------------------------------------------|----------------------------------|------------------------------------|----------------------------------|------------------------------------|
| Schraml, 2013 <sup>34</sup><br>Fair | 91.19% (89.41 to 93.97)                        | NR                                           | 58.82% (32.92 to 81.56)                        | NR                               | 98.73% (97.78 to 99.28)            | NR                               | 17.24% (11.41 to 25.21)            |
| Schraml, 2013 <sup>34</sup><br>Fair | 91.06% (88.47 to 93.23)                        | NR                                           | 14.52% (6.86 to 25.78)                         | NR                               | 91.06% (90.16 to 91.89)            | NR                               | 14.52% (8.10 to 24.66)             |
| Schraml, 2013 <sup>34</sup><br>Fair | 64.25% (60.24 to 68.11)                        | NR                                           | 50% (26.02 to 73.98)                           | NR                               | 97.69% (96.37 to 98.54)            | NR                               | 4.07% (2.57 to 6.39)               |
| Schraml, 2013 <sup>34</sup><br>Fair | 81.25% (77.87 to 84.32)                        | NR                                           | 17.31% (8.23 to 30.33)                         | NR                               | 81.79% (90.76 to 92.72)            | NR                               | 7.50% (4.19 to 13.07)              |
| Schraml, 2013 <sup>34</sup><br>Fair | 100% (93.40 to 100.00)                         | NR                                           | Unable to calculate                            | NR                               | 100.00%                            | NR                               | Unable to calculate                |

**Table 4a. Studies of Diagnostic Accuracy of SSTR-PET for Identification of NETs**

| <b>Author, year<br/>Quality</b>     | <b>Reported<br/>AUROC</b> | <b>Calculated PLR<br/>(95% CI)</b> | <b>Reported PLR<br/>(95% CI)</b> | <b>Calculated NLR<br/>(95% CI)</b> | <b>Reported NLR<br/>(95% CI)</b> | <b>Other<br/>Measures of<br/>Diagnostic<br/>Accuracy</b> | <b>Imaging<br/>Accuracy</b> |
|-------------------------------------|---------------------------|------------------------------------|----------------------------------|------------------------------------|----------------------------------|----------------------------------------------------------|-----------------------------|
| Schraml, 2013 <sup>34</sup><br>Fair | NR                        | 2.23 (1.26 to 3.94)                | NR                               | 0.14 (0.09 to 0.22)                | NR                               | NR                                                       | NR                          |
| Schraml, 2013 <sup>34</sup><br>Fair | NR                        | 1.07 (0.96 to 1.18)                | NR                               | 0.62 (0.32 to 1.19)                | NR                               | NR                                                       | NR                          |
| Schraml, 2013 <sup>34</sup><br>Fair | NR                        | 1.28 (0.81 to 2.05)                | NR                               | 0.72 (0.44 to 1.15)                | NR                               | NR                                                       | NR                          |
| Schraml, 2013 <sup>34</sup><br>Fair | NR                        | 0.98 (0.86 to 1.12)                | NR                               | 0.98 (0.86 to 1.12)                | NR                               | NR                                                       | NR                          |
| Schraml, 2013 <sup>34</sup><br>Fair | NR                        | 1                                  | NR                               | Unable to<br>calculate             | NR                               | NR                                                       | NR                          |

**Table 4a. Studies of Diagnostic Accuracy of SSTR-PET for Identification of NETs**

| <b>Author, year<br/>Quality</b>     | <b>Tracer</b>            | <b>Imaging Test</b> | <b>Definition of a Positive Test</b>                                                                                                                                                                                                                                                                   | <b>Reference Standard</b> | <b>Type of Study</b> | <b>Country<br/>Setting</b> |
|-------------------------------------|--------------------------|---------------------|--------------------------------------------------------------------------------------------------------------------------------------------------------------------------------------------------------------------------------------------------------------------------------------------------------|---------------------------|----------------------|----------------------------|
| Schraml, 2013 <sup>34</sup><br>Fair | Not applicable           | MRI                 | Based on standard reading criteria established in clinical practice by taking into account morphologic features and enhancement characteristics.                                                                                                                                                       | Same as above             | Same as above        | Same as above              |
| Schraml, 2013 <sup>34</sup><br>Fair | <sup>68</sup> Ga-DOTATOC | PET                 | In PET images, focal uptake exceeding normal regional tracer accumulation was classified as a malignant lesion.                                                                                                                                                                                        | Same as above             | Same as above        | Same as above              |
| Schraml, 2013 <sup>34</sup><br>Fair | Not applicable           | CT                  | Based on standard reading criteria established in clinical practice by taking into account morphologic features and enhancement characteristics.                                                                                                                                                       | Same as above             | Same as above        | Same as above              |
| Schraml, 2013 <sup>34</sup><br>Fair | <sup>68</sup> Ga-DOTATOC | PET/CT              | In PET images, focal uptake exceeding normal regional tracer accumulation was classified as a malignant lesion. This was combined with the CT assessment using standard reading criteria established in clinical practice by taking into account morphologic features and enhancement characteristics. | Same as above             | Same as above        | Same as above              |
| Schraml, 2013 <sup>34</sup><br>Fair | Not applicable           | MRI                 | Based on standard reading criteria established in clinical practice by taking into account morphologic features and enhancement characteristics.                                                                                                                                                       | Same as above             | Same as above        | Same as above              |
| Schraml, 2013 <sup>34</sup><br>Fair | <sup>68</sup> Ga-DOTATOC | PET                 | In PET images, focal uptake exceeding normal regional tracer accumulation was classified as a malignant lesion.                                                                                                                                                                                        | Same as above             | Same as above        | Same as above              |

**Table 4a. Studies of Diagnostic Accuracy of SSTR-PET for Identification of NETs**

| <b>Author, year<br/>Quality</b>     | <b>Inclusion Criteria</b> | <b>Population Characteristics</b> | <b>Sample Size<br/>Proportion<br/>With Condition</b> | <b>Analysis Method</b>                                            | <b>TP</b> | <b>FP</b> | <b>FN</b> | <b>TN</b> | <b>Reported<br/>Sensitivity<br/>(95% CI)</b> |
|-------------------------------------|---------------------------|-----------------------------------|------------------------------------------------------|-------------------------------------------------------------------|-----------|-----------|-----------|-----------|----------------------------------------------|
| Schraml, 2013 <sup>34</sup><br>Fair | Same as above             | Same as above                     | Same as above                                        | Detection of metastatic disease in the lungs, per-lesion analysis | 47        | 1         | 7         | -         | 87% (75 to 95)                               |
| Schraml, 2013 <sup>34</sup><br>Fair | Same as above             | Same as above                     | Same as above                                        | Detection of metastatic disease in the lungs, per-lesion analysis | 4         | 1         | 50        | -         | 7% (2 to 18)                                 |
| Schraml, 2013 <sup>34</sup><br>Fair | Same as above             | Same as above                     | Same as above                                        | Detection of metastatic disease in the lungs, per-lesion analysis | 54        | 0         | 0         | -         | 100% (93 to 100)                             |
| Schraml, 2013 <sup>34</sup><br>Fair | Same as above             | Same as above                     | Same as above                                        | Detection of metastatic disease in the liver, per-lesion analysis | 245       | 0         | 21        | -         | 92% (88 to 95)                               |
| Schraml, 2013 <sup>34</sup><br>Fair | Same as above             | Same as above                     | Same as above                                        | Detection of metastatic disease in the liver, per-lesion analysis | 264       | 11        | 2         | -         | 99% (97 to 99)                               |
| Schraml, 2013 <sup>34</sup><br>Fair | Same as above             | Same as above                     | Same as above                                        | Detection of metastatic disease in the liver, per-lesion analysis | 169       | 0         | 97        | -         | 64% (57 to 69)                               |

**Table 4a. Studies of Diagnostic Accuracy of SSTR-PET for Identification of NETs**

| <b>Author, year<br/>Quality</b>     | <b>Calculated<br/>Sensitivity<br/>(95% CI)</b> | <b>Reported<br/>Specificity<br/>(95% CI)</b> | <b>Calculated<br/>Specificity<br/>(95% CI)</b> | <b>Reported PPV<br/>(95% CI)</b> | <b>Calculated PPV<br/>(95% CI)</b> | <b>Reported NPV<br/>(95% CI)</b> | <b>Calculated NPV<br/>(95% CI)</b> |
|-------------------------------------|------------------------------------------------|----------------------------------------------|------------------------------------------------|----------------------------------|------------------------------------|----------------------------------|------------------------------------|
| Schraml, 2013 <sup>34</sup><br>Fair | 87.04% (75.10 to 94.63)                        | NR                                           | Unable to calculate                            | NR                               | 97.92% (97.70 to 98.12)            | NR                               | Unable to calculate                |
| Schraml, 2013 <sup>34</sup><br>Fair | 7.41% (2.06 to 17.89)                          | NR                                           | Unable to calculate                            | NR                               | 80.00% (60.90 to 91.13)            | NR                               | Unable to calculate                |
| Schraml, 2013 <sup>34</sup><br>Fair | 100% (93.40 to 100.00)                         | NR                                           | Unable to calculate                            | NR                               | 100.00%                            | NR                               | Unable to calculate                |
| Schraml, 2013 <sup>34</sup><br>Fair | 92.11% (88.19 to 95.05)                        | NR                                           | Unable to calculate                            | NR                               | 100.00%                            | NR                               | Unable to calculate                |
| Schraml, 2013 <sup>34</sup><br>Fair | 99.25% (97.31 to 99.91)                        | NR                                           | Unable to calculate                            | NR                               | 96.00% (95.96 to 96.04)            | NR                               | Unable to calculate                |
| Schraml, 2013 <sup>34</sup><br>Fair | 63.53% (57.44 to 69.33)                        | NR                                           | Unable to calculate                            | NR                               | 100.00%                            | NR                               | Unable to calculate                |

**Table 4a. Studies of Diagnostic Accuracy of SSTR-PET for Identification of NETs**

| <b>Author, year<br/>Quality</b>     | <b>Reported<br/>AUROC</b> | <b>Calculated PLR<br/>(95% CI)</b> | <b>Reported PLR<br/>(95% CI)</b> | <b>Calculated NLR<br/>(95% CI)</b> | <b>Reported NLR<br/>(95% CI)</b> | <b>Other<br/>Measures of<br/>Diagnostic<br/>Accuracy</b> | <b>Imaging<br/>Accuracy</b> |
|-------------------------------------|---------------------------|------------------------------------|----------------------------------|------------------------------------|----------------------------------|----------------------------------------------------------|-----------------------------|
| Schraml, 2013 <sup>34</sup><br>Fair | NR                        | 0.7 (0.79 to 0.96)                 | NR                               | Unable to<br>calculate             | NR                               | NR                                                       | NR                          |
| Schraml, 2013 <sup>34</sup><br>Fair | NR                        | 0.07 (0.03 to 0.19)                | NR                               | Unable to<br>calculate             | NR                               | NR                                                       | NR                          |
| Schraml, 2013 <sup>34</sup><br>Fair | NR                        | 1                                  | NR                               | Unable to<br>calculate             | NR                               | NR                                                       | NR                          |
| Schraml, 2013 <sup>34</sup><br>Fair | NR                        | 0.92                               | NR                               | Unable to<br>calculate             | NR                               | NR                                                       | NR                          |
| Schraml, 2013 <sup>34</sup><br>Fair | NR                        | 0.99 (0.98 to 1.00)                | NR                               | Unable to<br>calculate             | NR                               | NR                                                       | NR                          |
| Schraml, 2013 <sup>34</sup><br>Fair | NR                        | 0.64                               | NR                               | Unable to<br>calculate             | NR                               | NR                                                       | NR                          |

**Table 4a. Studies of Diagnostic Accuracy of SSTR-PET for Identification of NETs**

| <b>Author, year<br/>Quality</b>     | <b>Tracer</b>            | <b>Imaging Test</b> | <b>Definition of a Positive Test</b>                                                                                                                                                                                                                                                                   | <b>Reference Standard</b> | <b>Type of Study</b> | <b>Country<br/>Setting</b> |
|-------------------------------------|--------------------------|---------------------|--------------------------------------------------------------------------------------------------------------------------------------------------------------------------------------------------------------------------------------------------------------------------------------------------------|---------------------------|----------------------|----------------------------|
| Schraml, 2013 <sup>34</sup><br>Fair | Not applicable           | CT                  | Based on standard reading criteria established in clinical practice by taking into account morphologic features and enhancement characteristics.                                                                                                                                                       | Same as above             | Same as above        | Same as above              |
| Schraml, 2013 <sup>34</sup><br>Fair | <sup>68</sup> Ga-DOTATOC | PET/CT              | In PET images, focal uptake exceeding normal regional tracer accumulation was classified as a malignant lesion. This was combined with the CT assessment using standard reading criteria established in clinical practice by taking into account morphologic features and enhancement characteristics. | Same as above             | Same as above        | Same as above              |
| Schraml, 2013 <sup>34</sup><br>Fair | Not applicable           | MRI                 | Based on standard reading criteria established in clinical practice by taking into account morphologic features and enhancement characteristics.                                                                                                                                                       | Same as above             | Same as above        | Same as above              |
| Schraml, 2013 <sup>34</sup><br>Fair | <sup>68</sup> Ga-DOTATOC | PET                 | In PET images, focal uptake exceeding normal regional tracer accumulation was classified as a malignant lesion.                                                                                                                                                                                        | Same as above             | Same as above        | Same as above              |
| Schraml, 2013 <sup>34</sup><br>Fair | Not applicable           | CT                  | Based on standard reading criteria established in clinical practice by taking into account morphologic features and enhancement characteristics.                                                                                                                                                       | Same as above             | Same as above        | Same as above              |

**Table 4a. Studies of Diagnostic Accuracy of SSTR-PET for Identification of NETs**

| <b>Author, year<br/>Quality</b>     | <b>Inclusion Criteria</b> | <b>Population Characteristics</b> | <b>Sample Size<br/>Proportion<br/>With Condition</b> | <b>Analysis Method</b>                                            | <b>TP</b> | <b>FP</b> | <b>FN</b> | <b>TN</b> | <b>Reported<br/>Sensitivity<br/>(95% CI)</b> |
|-------------------------------------|---------------------------|-----------------------------------|------------------------------------------------------|-------------------------------------------------------------------|-----------|-----------|-----------|-----------|----------------------------------------------|
| Schraml, 2013 <sup>34</sup><br>Fair | Same as above             | Same as above                     | Same as above                                        | Detection of metastatic disease in the liver, per-lesion analysis | 226       | 3         | 40        | -         | 85% (80 to 89)                               |
| Schraml, 2013 <sup>34</sup><br>Fair | Same as above             | Same as above                     | Same as above                                        | Detection of metastatic disease in the bones, per-lesion analysis | 108       | 0         | 23        | -         | 82% (75 to 89)                               |
| Schraml, 2013 <sup>34</sup><br>Fair | Same as above             | Same as above                     | Same as above                                        | Detection of metastatic disease in the bones, per-lesion analysis | 126       | 2         | 5         | -         | 96% (91 to 99)                               |
| Schraml, 2013 <sup>34</sup><br>Fair | Same as above             | Same as above                     | Same as above                                        | Detection of metastatic disease in the bones, per-lesion analysis | 90        | 0         | 41        | -         | 69% (60 to 77)                               |
| Schraml, 2013 <sup>34</sup><br>Fair | Same as above             | Same as above                     | Same as above                                        | Detection of metastatic disease in the bones, per-lesion analysis | 81        | 0         | 50        | -         | 62% (53 to 70)                               |



**Table 4a. Studies of Diagnostic Accuracy of SSTR-PET for Identification of NETs**

| <b>Author, year<br/>Quality</b>     | <b>Calculated<br/>Sensitivity<br/>(95% CI)</b> | <b>Reported<br/>Specificity<br/>(95% CI)</b> | <b>Calculated<br/>Specificity<br/>(95% CI)</b> | <b>Reported PPV<br/>(95% CI)</b> | <b>Calculated PPV<br/>(95% CI)</b> | <b>Reported NPV<br/>(95% CI)</b> | <b>Calculated NPV<br/>(95% CI)</b> |
|-------------------------------------|------------------------------------------------|----------------------------------------------|------------------------------------------------|----------------------------------|------------------------------------|----------------------------------|------------------------------------|
| Schraml, 2013 <sup>34</sup><br>Fair | 84.96% (80.09 to 89.03)                        | NR                                           | Unable to calculate                            | NR                               | 98.69% (98.62 to 98.75)            | NR                               | Unable to calculate                |
| Schraml, 2013 <sup>34</sup><br>Fair | 82.44% (74.83 to 88.53)                        | NR                                           | Unable to calculate                            | NR                               | 100.00%                            | NR                               | Unable to calculate                |
| Schraml, 2013 <sup>34</sup><br>Fair | 96.18% (91.32 to 98.75)                        | NR                                           | Unable to calculate                            | NR                               | 98.44% (98.38 to 98.49)            | NR                               | Unable to calculate                |
| Schraml, 2013 <sup>34</sup><br>Fair | 68.70% (60.02 to 76.52)                        | NR                                           | Unable to calculate                            | NR                               | 100.00%                            | NR                               | Unable to calculate                |
| Schraml, 2013 <sup>34</sup><br>Fair | 61.83% (52.94 to 70.18)                        | NR                                           | Unable to calculate                            | NR                               | 100.00%                            | NR                               | Unable to calculate                |

**Table 4a. Studies of Diagnostic Accuracy of SSTR-PET for Identification of NETs**

| <b>Author, year<br/>Quality</b>     | <b>Reported<br/>AUROC</b> | <b>Calculated PLR<br/>(95% CI)</b> | <b>Reported PLR<br/>(95% CI)</b> | <b>Calculated NLR<br/>(95% CI)</b> | <b>Reported NLR<br/>(95% CI)</b> | <b>Other<br/>Measures of<br/>Diagnostic<br/>Accuracy</b> | <b>Imaging<br/>Accuracy</b> |
|-------------------------------------|---------------------------|------------------------------------|----------------------------------|------------------------------------|----------------------------------|----------------------------------------------------------|-----------------------------|
| Schraml, 2013 <sup>34</sup><br>Fair | NR                        | 0.85 (0.81 to 0.89)                | NR                               | Unable to<br>calculate             | NR                               | NR                                                       | NR                          |
| Schraml, 2013 <sup>34</sup><br>Fair | NR                        | 0.82                               | NR                               | Unable to<br>calculate             | NR                               | NR                                                       | NR                          |
| Schraml, 2013 <sup>34</sup><br>Fair | NR                        | 0.96 (0.93 to 1.00)                | NR                               | Unable to<br>calculate             | NR                               | NR                                                       | NR                          |
| Schraml, 2013 <sup>34</sup><br>Fair | NR                        | 0.69                               | NR                               | Unable to<br>calculate             | NR                               | NR                                                       | NR                          |
| Schraml, 2013 <sup>34</sup><br>Fair | NR                        | 0.62                               | NR                               | Unable to<br>calculate             | NR                               | NR                                                       | NR                          |

**Table 4a. Studies of Diagnostic Accuracy of SSTR-PET for Identification of NETs**

| <b>Author, year<br/>Quality</b>     | <b>Tracer</b>            | <b>Imaging Test</b> | <b>Definition of a Positive Test</b>                                                                                                                                                                                                                                                                   | <b>Reference Standard</b> | <b>Type of Study</b> | <b>Country<br/>Setting</b> |
|-------------------------------------|--------------------------|---------------------|--------------------------------------------------------------------------------------------------------------------------------------------------------------------------------------------------------------------------------------------------------------------------------------------------------|---------------------------|----------------------|----------------------------|
| Schraml, 2013 <sup>34</sup><br>Fair | <sup>68</sup> Ga-DOTATOC | PET/CT              | In PET images, focal uptake exceeding normal regional tracer accumulation was classified as a malignant lesion. This was combined with the CT assessment using standard reading criteria established in clinical practice by taking into account morphologic features and enhancement characteristics. | Same as above             | Same as above        | Same as above              |
| Schraml, 2013 <sup>34</sup><br>Fair | Not applicable           | MRI                 | Based on standard reading criteria established in clinical practice by taking into account morphologic features and enhancement characteristics.                                                                                                                                                       | Same as above             | Same as above        | Same as above              |
| Schraml, 2013 <sup>34</sup><br>Fair | <sup>68</sup> Ga-DOTATOC | PET                 | In PET images, focal uptake exceeding normal regional tracer accumulation was classified as a malignant lesion.                                                                                                                                                                                        | Same as above             | Same as above        | Same as above              |
| Schraml, 2013 <sup>34</sup><br>Fair | Not applicable           | CT                  | Based on standard reading criteria established in clinical practice by taking into account morphologic features and enhancement characteristics.                                                                                                                                                       | Same as above             | Same as above        | Same as above              |
| Schraml, 2013 <sup>34</sup><br>Fair | <sup>68</sup> Ga-DOTATOC | PET/CT              | In PET images, focal uptake exceeding normal regional tracer accumulation was classified as a malignant lesion. This was combined with the CT assessment using standard reading criteria established in clinical practice by taking into account morphologic features and enhancement characteristics. | Same as above             | Same as above        | Same as above              |

**Table 4a. Studies of Diagnostic Accuracy of SSTR-PET for Identification of NETs**

| <b>Author, year<br/>Quality</b>     | <b>Inclusion Criteria</b> | <b>Population Characteristics</b> | <b>Sample Size<br/>Proportion<br/>With Condition</b> | <b>Analysis Method</b>                                                  | <b>TP</b> | <b>FP</b> | <b>FN</b> | <b>TN</b> | <b>Reported<br/>Sensitivity<br/>(95% CI)</b> |
|-------------------------------------|---------------------------|-----------------------------------|------------------------------------------------------|-------------------------------------------------------------------------|-----------|-----------|-----------|-----------|----------------------------------------------|
| Schraml, 2013 <sup>34</sup><br>Fair | Same as above             | Same as above                     | Same as above                                        | Detection of metastatic disease in the lymph nodes, per-lesion analysis | 99        | 4         | 0         | -         | 100% (96 to 100)                             |
| Schraml, 2013 <sup>34</sup><br>Fair | Same as above             | Same as above                     | Same as above                                        | Detection of metastatic disease in the lymph nodes, per-lesion analysis | 72        | 34        | 27        | -         | 73% (63 to 81)                               |
| Schraml, 2013 <sup>34</sup><br>Fair | Same as above             | Same as above                     | Same as above                                        | Detection of metastatic disease in the lymph nodes, per-lesion analysis | 96        | 3         | 3         | -         | 97% (91 to 99)                               |
| Schraml, 2013 <sup>34</sup><br>Fair | Same as above             | Same as above                     | Same as above                                        | Detection of metastatic disease in the lymph nodes, per-lesion analysis | 87        | 38        | 12        | -         | 88% (80 to 94)                               |
| Schraml, 2013 <sup>34</sup><br>Fair | Same as above             | Same as above                     | Same as above                                        | Detection of metastatic disease in other organs, per-lesion analysis    | 39        | 3         | 4         | -         | 91% (78 to 97)                               |

**Table 4a. Studies of Diagnostic Accuracy of SSTR-PET for Identification of NETs**

| <b>Author, year<br/>Quality</b>     | <b>Calculated<br/>Sensitivity<br/>(95% CI)</b> | <b>Reported<br/>Specificity<br/>(95% CI)</b> | <b>Calculated<br/>Specificity<br/>(95% CI)</b> | <b>Reported PPV<br/>(95% CI)</b> | <b>Calculated PPV<br/>(95% CI)</b> | <b>Reported NPV<br/>(95% CI)</b> | <b>Calculated NPV<br/>(95% CI)</b> |
|-------------------------------------|------------------------------------------------|----------------------------------------------|------------------------------------------------|----------------------------------|------------------------------------|----------------------------------|------------------------------------|
| Schraml, 2013 <sup>34</sup><br>Fair | 100% (96.34 to 100.00)                         | NR                                           | Unable to calculate                            | NR                               | 96.12% (96.12 to 96.12)            | NR                               | Unable to calculate                |
| Schraml, 2013 <sup>34</sup><br>Fair | 72.73% (62.85 to 81.20)                        | NR                                           | Unable to calculate                            | NR                               | 67.92% (65.24 to 70.49)            | NR                               | Unable to calculate                |
| Schraml, 2013 <sup>34</sup><br>Fair | 96.97% (91.40 to 99.37)                        | NR                                           | Unable to calculate                            | NR                               | 96.97% (96.87 to 97.07)            | NR                               | Unable to calculate                |
| Schraml, 2013 <sup>34</sup><br>Fair | 87.88% (79.78 to 93.58)                        | NR                                           | Unable to calculate                            | NR                               | 69.60% (68.03 to 71.13)            | NR                               | Unable to calculate                |
| Schraml, 2013 <sup>34</sup><br>Fair | 90.70% (77.86 to 97.41)                        | NR                                           | Unable to calculate                            | NR                               | 92.86% (92.20 to 93.47)            | NR                               | Unable to calculate                |

**Table 4a. Studies of Diagnostic Accuracy of SSTR-PET for Identification of NETs**

| <b>Author, year<br/>Quality</b>     | <b>Reported<br/>AUROC</b> | <b>Calculated PLR<br/>(95% CI)</b> | <b>Reported PLR<br/>(95% CI)</b> | <b>Calculated NLR<br/>(95% CI)</b> | <b>Reported NLR<br/>(95% CI)</b> | <b>Other<br/>Measures of<br/>Diagnostic<br/>Accuracy</b> | <b>Imaging<br/>Accuracy</b> |
|-------------------------------------|---------------------------|------------------------------------|----------------------------------|------------------------------------|----------------------------------|----------------------------------------------------------|-----------------------------|
| Schraml, 2013 <sup>34</sup><br>Fair | NR                        | 1 (1 to 1)                         | NR                               | Unable to<br>calculate             | NR                               | NR                                                       | NR                          |
| Schraml, 2013 <sup>34</sup><br>Fair | NR                        | 0.73 (0.64 to 0.82)                | NR                               | Unable to<br>calculate             | NR                               | NR                                                       | NR                          |
| Schraml, 2013 <sup>34</sup><br>Fair | NR                        | 0.97 (0.94 to 1.00)                | NR                               | Unable to<br>calculate             | NR                               | NR                                                       | NR                          |
| Schraml, 2013 <sup>34</sup><br>Fair | NR                        | 0.88 (0.82 to 0.95)                | NR                               | Unable to<br>calculate             | NR                               | NR                                                       | NR                          |
| Schraml, 2013 <sup>34</sup><br>Fair | NR                        | 0.91 (0.82 to 1.00)                | NR                               | Unable to<br>calculate             | NR                               | NR                                                       | NR                          |

**Table 4a. Studies of Diagnostic Accuracy of SSTR-PET for Identification of NETs**

| <b>Author, year<br/>Quality</b>       | <b>Tracer</b>            | <b>Imaging Test</b> | <b>Definition of a Positive Test</b>                                                                                                             | <b>Reference Standard</b>                                                                     | <b>Type of Study</b> | <b>Country<br/>Setting</b> |
|---------------------------------------|--------------------------|---------------------|--------------------------------------------------------------------------------------------------------------------------------------------------|-----------------------------------------------------------------------------------------------|----------------------|----------------------------|
| Schraml, 2013 <sup>34</sup><br>Fair   | Not applicable           | MRI                 | Based on standard reading criteria established in clinical practice by taking into account morphologic features and enhancement characteristics. | Same as above                                                                                 | Same as above        | Same as above              |
| Schraml, 2013 <sup>34</sup><br>Fair   | <sup>68</sup> Ga-DOTATOC | PET                 | In PET images, focal uptake exceeding normal regional tracer accumulation was classified as a malignant lesion.                                  | Same as above                                                                                 | Same as above        | Same as above              |
| Schraml, 2013 <sup>34</sup><br>Fair   | Not applicable           | CT                  | Based on standard reading criteria established in clinical practice by taking into account morphologic features and enhancement characteristics. | Same as above                                                                                 | Same as above        | Same as above              |
| Schreiter, 2012 <sup>35</sup><br>Fair | <sup>68</sup> Ga-DOTATOC | PET/CT              | Readers rated lesions on 3-point scale (1=benign; 2=indifferent; 3=malignant), those rated 3 were considered positive.                           | Histopathology, follow-up examinations (mean follow-up was 29 months; range was 7-72 months). | Prospective cohort   | Unclear                    |
| Schreiter, 2012 <sup>35</sup><br>Fair | Not applicable           | MRI                 | Same as above                                                                                                                                    | Same as above                                                                                 | Same as above        | Same as above              |
| Schreiter, 2012 <sup>35</sup><br>Fair | Not applicable           | CT                  | Same as above                                                                                                                                    | Same as above                                                                                 | Same as above        | Same as above              |

**Table 4a. Studies of Diagnostic Accuracy of SSTR-PET for Identification of NETs**

| Author, year<br>Quality               | Inclusion Criteria                                                                                                                                                                                                                                                                                                                       | Population Characteristics                                                                                                                                                             | Sample Size<br>Proportion<br>With Condition | Analysis Method                                                           | TP | FP | FN | TN | Reported<br>Sensitivity<br>(95% CI) |
|---------------------------------------|------------------------------------------------------------------------------------------------------------------------------------------------------------------------------------------------------------------------------------------------------------------------------------------------------------------------------------------|----------------------------------------------------------------------------------------------------------------------------------------------------------------------------------------|---------------------------------------------|---------------------------------------------------------------------------|----|----|----|----|-------------------------------------|
| Schraml, 2013 <sup>34</sup><br>Fair   | Same as above                                                                                                                                                                                                                                                                                                                            | Same as above                                                                                                                                                                          | Same as above                               | Detection of metastatic disease in other organs, per-lesion analysis      | 31 | 5  | 12 | -  | 72% (56 to 85)                      |
| Schraml, 2013 <sup>34</sup><br>Fair   | Same as above                                                                                                                                                                                                                                                                                                                            | Same as above                                                                                                                                                                          | Same as above                               | Detection of metastatic disease in other organs, per-lesion analysis      | 22 | 5  | 21 | -  | 51% (36 to 67)                      |
| Schraml, 2013 <sup>34</sup><br>Fair   | Same as above                                                                                                                                                                                                                                                                                                                            | Same as above                                                                                                                                                                          | Same as above                               | Detection of metastatic disease in other organs, per-lesion analysis      | 33 | 2  | 9  | -  | 79% (61 to 88)                      |
| Schreiter, 2012 <sup>35</sup><br>Fair | Patients with biopsy proven NET scheduled for <sup>68</sup> Ga-DOTATOC PET/CT because of known or suspected liver metastases on the basis of other imaging results. Patients were excluded due to inadequate contrast enhancement in the liver during multiphase PET/CT, and claustrophobia with discontinuation of the MRI examination. | Age (mean, years): 54.8; range: 34-73<br>Female: 41%<br>Primary tumors:<br>-Pancreas: 46%<br>-Ileum: 23%<br>-Stomach: 9%<br>-Duodenum: 9%<br>-Rectum: 5%<br>-Lungs: 5%<br>-Unknown: 5% | N=22<br>NR                                  | Differentiation of liver metastases from NET lesions, per-lesion analysis | NR | NR | NR | NR | 73.5% (64.3 to 81.3)                |
| Schreiter, 2012 <sup>35</sup><br>Fair | Same as above                                                                                                                                                                                                                                                                                                                            | Same as above                                                                                                                                                                          | Same as above                               | Differentiation of liver metastases from NET lesions, per-lesion analysis | NR | NR | NR | NR | 87.6% (80.1 to 93.1)                |
| Schreiter, 2012 <sup>35</sup><br>Fair | Same as above                                                                                                                                                                                                                                                                                                                            | Same as above                                                                                                                                                                          | Same as above                               | Differentiation of liver metastases from NET lesions, per-lesion analysis | NR | NR | NR | NR | 68.1% (58.7 to 76.6)                |



**Table 4a. Studies of Diagnostic Accuracy of SSTR-PET for Identification of NETs**

| <b>Author, year<br/>Quality</b>       | <b>Calculated<br/>Sensitivity<br/>(95% CI)</b> | <b>Reported<br/>Specificity<br/>(95% CI)</b> | <b>Calculated<br/>Specificity<br/>(95% CI)</b> | <b>Reported PPV<br/>(95% CI)</b> | <b>Calculated PPV<br/>(95% CI)</b> | <b>Reported NPV<br/>(95% CI)</b> | <b>Calculated NPV<br/>(95% CI)</b> |
|---------------------------------------|------------------------------------------------|----------------------------------------------|------------------------------------------------|----------------------------------|------------------------------------|----------------------------------|------------------------------------|
| Schraml, 2013 <sup>34</sup><br>Fair   | 72.09% (56.33 to 84.67)                        | NR                                           | Unable to calculate                            | NR                               | 86.11% (83.73 to 88.19)            | NR                               | Unable to calculate                |
| Schraml, 2013 <sup>34</sup><br>Fair   | 51.16% (35.46 to 66.69)                        | NR                                           | Unable to calculate                            | NR                               | 81.48% (76.67 to 85.49)            | NR                               | Unable to calculate                |
| Schraml, 2013 <sup>34</sup><br>Fair   | 78.57% (63.19 to 89.70)                        | NR                                           | Unable to calculate                            | NR                               | 94.29% (93.37 to 95.08)            | NR                               | Unable to calculate                |
| Schreiter, 2012 <sup>35</sup><br>Fair | Unable to calculate                            | 88.2% (78.6 to 99.1)                         | Unable to calculate                            | 93.4% (87.4 to 97.1)             | Unable to calculate                | 69.4% (59.3 to 78.3)             | Unable to calculate                |
| Schreiter, 2012 <sup>35</sup><br>Fair | Unable to calculate                            | 86.8% (76.4 to 93.8)                         | Unable to calculate                            | 92.6% (86.5 to 96.6)             | Unable to calculate                | 82.9% (73 to 90.3)               | Unable to calculate                |
| Schreiter, 2012 <sup>35</sup><br>Fair | Unable to calculate                            | 85.3% (74.6 to 92.7)                         | Unable to calculate                            | 91.9% (85.6 to 96)               | Unable to calculate                | 65.4% (55.4 to 74.4)             | Unable to calculate                |

**Table 4a. Studies of Diagnostic Accuracy of SSTR-PET for Identification of NETs**

| <b>Author, year<br/>Quality</b>       | <b>Reported<br/>AUROC</b> | <b>Calculated PLR<br/>(95% CI)</b> | <b>Reported PLR<br/>(95% CI)</b> | <b>Calculated NLR<br/>(95% CI)</b> | <b>Reported NLR<br/>(95% CI)</b> | <b>Other<br/>Measures of<br/>Diagnostic<br/>Accuracy</b> | <b>Imaging<br/>Accuracy</b> |
|---------------------------------------|---------------------------|------------------------------------|----------------------------------|------------------------------------|----------------------------------|----------------------------------------------------------|-----------------------------|
| Schraml, 2013 <sup>34</sup><br>Fair   | NR                        | 0.72 ( 0.60 to<br>0.87)            | NR                               | Unable to<br>calculate             | NR                               | NR                                                       | NR                          |
| Schraml, 2013 <sup>34</sup><br>Fair   | NR                        | 0.51 (0.38 to 0.69)                | NR                               | Unable to<br>calculate             | NR                               | NR                                                       | NR                          |
| Schraml, 2013 <sup>34</sup><br>Fair   | NR                        | 0.79 (0.67 to 0.92)                | NR                               | Unable to<br>calculate             | NR                               | NR                                                       | NR                          |
| Schreiter, 2012 <sup>35</sup><br>Fair | NR                        | Unable to<br>calculate             | NR                               | Unable to<br>calculate             | NR                               | NR                                                       | NR                          |
| Schreiter, 2012 <sup>35</sup><br>Fair | NR                        | Unable to<br>calculate             | NR                               | Unable to<br>calculate             | NR                               | NR                                                       | NR                          |
| Schreiter, 2012 <sup>35</sup><br>Fair | NR                        | Unable to<br>calculate             | NR                               | Unable to<br>calculate             | NR                               | NR                                                       | NR                          |

**Table 4a. Studies of Diagnostic Accuracy of SSTR-PET for Identification of NETs**

| <b>Author, year<br/>Quality</b>           | <b>Tracer</b>                   | <b>Imaging Test</b> | <b>Definition of a Positive Test</b>                                                                                                                    | <b>Reference Standard</b>                  | <b>Type of Study</b> | <b>Country<br/>Setting</b>     |
|-------------------------------------------|---------------------------------|---------------------|---------------------------------------------------------------------------------------------------------------------------------------------------------|--------------------------------------------|----------------------|--------------------------------|
| Schreiter, 2012 <sup>35</sup><br>Fair     | <sup>68</sup> Ga-DOTATOC        | PET                 | Same as above                                                                                                                                           | Same as above                              | Same as above        | Same as above                  |
| Schreiter, 2012 <sup>35</sup><br>Fair     | <sup>68</sup> Ga-DOTATOC        | PET-MRI             | Same as above                                                                                                                                           | Same as above                              | Same as above        | Same as above                  |
| Van Binnebeek, 2016 <sup>36</sup><br>Poor | <sup>68</sup> Ga-DOTATOC        | PET/CT              | A focus or an area of increased tracer uptake (with the surrounding tissue as a reference region) which could not be explained by physiological uptake. | Maintenance of lesions on follow-up scans. | Prospective trial    | Belgium<br>University hospital |
| Van Binnebeek, 2016 <sup>36</sup><br>Poor | <sup>111</sup> In-Pentetreotide | SPECT/CT            | A focus or an area of increased tracer uptake (with the surrounding tissue as a reference region) which could not be explained by physiological uptake. | Same as above                              | Same as above        | Same as above                  |
| Van Binnebeek, 2016 <sup>36</sup><br>Poor | <sup>68</sup> Ga-DOTATOC        | PET/CT              | A focus or an area of increased tracer uptake (with the surrounding tissue as a reference region) which could not be explained by physiological uptake. | Same as above                              | Same as above        | Same as above                  |
| Van Binnebeek, 2016 <sup>36</sup><br>Poor | <sup>111</sup> In-Pentetreotide | SPECT/CT            | A focus or an area of increased tracer uptake (with the surrounding tissue as a reference region) which could not be explained by physiological uptake. | Same as above                              | Same as above        | Same as above                  |

**Table 4a. Studies of Diagnostic Accuracy of SSTR-PET for Identification of NETs**

| <b>Author, year<br/>Quality</b>           | <b>Inclusion Criteria</b>                                                           | <b>Population Characteristics</b>                                                                                                                                                                            | <b>Sample Size<br/>Proportion<br/>With Condition</b> | <b>Analysis Method</b>                                                    | <b>TP</b> | <b>FP</b> | <b>FN</b> | <b>TN</b> | <b>Reported<br/>Sensitivity<br/>(95% CI)</b> |
|-------------------------------------------|-------------------------------------------------------------------------------------|--------------------------------------------------------------------------------------------------------------------------------------------------------------------------------------------------------------|------------------------------------------------------|---------------------------------------------------------------------------|-----------|-----------|-----------|-----------|----------------------------------------------|
| Schreiter, 2012 <sup>35</sup><br>Fair     | Same as above                                                                       | Same as above                                                                                                                                                                                                | Same as above                                        | Differentiation of liver metastases from NET lesions, per-lesion analysis | NR        | NR        | NR        | NR        | 53.1% (43.5 to 62.5)                         |
| Schreiter, 2012 <sup>35</sup><br>Fair     | Same as above                                                                       | Same as above                                                                                                                                                                                                | Same as above                                        | Differentiation of liver metastases from NET lesions, per-lesion analysis | NR        | NR        | NR        | NR        | 91.2% (84.3 to 95.7)                         |
| Van Binnebeek, 2016 <sup>36</sup><br>Poor | Patients with metastatic NET, enrolled in a prospective phase II monocentric trial. | Age (mean, years): 59; range: 31-80<br>Female: 57%<br>Primary site<br>-Gastroenteropancreatic: 74%<br>-Lung: 7.5%<br>-Merckel cell carcinomas: 3.9%<br>-Breast: 1.8%<br>-Kidney: 1.8%<br>-Other/unknown: 11% | N=53<br>100%                                         | Detection of metastatic NETs, per-lesion analysis                         | NR        | NR        | NR        | NR        | 99.9% (99.3 to 100)                          |
| Van Binnebeek, 2016 <sup>36</sup><br>Poor | Same as above                                                                       | Same as above                                                                                                                                                                                                | Same as above                                        | Detection of metastatic NETs, per-lesion analysis                         | NR        | NR        | NR        | NR        | 60.1% (48.5 to 70.2)                         |
| Van Binnebeek, 2016 <sup>36</sup><br>Poor | Same as above                                                                       | Same as above                                                                                                                                                                                                | Same as above                                        | Detection of metastatic NETs in liver                                     | NR        | NR        | NR        | NR        | 99.8% (99.3 to 100)                          |
| Van Binnebeek, 2016 <sup>36</sup><br>Poor | Same as above                                                                       | Same as above                                                                                                                                                                                                | Same as above                                        | Detection of metastatic NETs in liver                                     | NR        | NR        | NR        | NR        | 66.5% (57.7 to 74.3)                         |

**Table 4a. Studies of Diagnostic Accuracy of SSTR-PET for Identification of NETs**

| <b>Author, year<br/>Quality</b>              | <b>Calculated<br/>Sensitivity<br/>(95% CI)</b> | <b>Reported<br/>Specificity<br/>(95% CI)</b> | <b>Calculated<br/>Specificity<br/>(95% CI)</b> | <b>Reported PPV<br/>(95% CI)</b> | <b>Calculated PPV<br/>(95% CI)</b> | <b>Reported NPV<br/>(95% CI)</b> | <b>Calculated NPV<br/>(95% CI)</b> |
|----------------------------------------------|------------------------------------------------|----------------------------------------------|------------------------------------------------|----------------------------------|------------------------------------|----------------------------------|------------------------------------|
| Schreiter, 2012 <sup>35</sup><br>Fair        | Unable to<br>calculate                         | 79.4% (74.6 to<br>92.7)                      | Unable to<br>calculate                         | 89.0% (85.6 to<br>96)            | Unable to<br>calculate             | 56.2% (46.9 to<br>65.2)          | Unable to<br>calculate             |
| Schreiter, 2012 <sup>35</sup><br>Fair        | Unable to<br>calculate                         | 95.6% (87.6 to<br>99.1)                      | Unable to<br>calculate                         | 97.4% (92.6 to<br>99.5)          | Unable to<br>calculate             | 87.2% (77.7 to<br>93.7)          | Unable to<br>calculate             |
| Van Binnebeek,<br>2016 <sup>36</sup><br>Poor | Unable to<br>calculate                         | NR                                           | Unable to<br>calculate                         | NR                               | Unable to<br>calculate             | NR                               | Unable to<br>calculate             |
| Van Binnebeek,<br>2016 <sup>36</sup><br>Poor | Unable to<br>calculate                         | NR                                           | Unable to<br>calculate                         | NR                               | Unable to<br>calculate             | NR                               | Unable to<br>calculate             |
| Van Binnebeek,<br>2016 <sup>36</sup><br>Poor | Unable to<br>calculate                         | NR                                           | Unable to<br>calculate                         | NR                               | Unable to<br>calculate             | NR                               | Unable to<br>calculate             |
| Van Binnebeek,<br>2016 <sup>36</sup><br>Poor | Unable to<br>calculate                         | NR                                           | Unable to<br>calculate                         | NR                               | Unable to<br>calculate             | NR                               | Unable to<br>calculate             |

**Table 4a. Studies of Diagnostic Accuracy of SSTR-PET for Identification of NETs**

| <b>Author, year<br/>Quality</b>              | <b>Reported<br/>AUROC</b> | <b>Calculated PLR<br/>(95% CI)</b> | <b>Reported PLR<br/>(95% CI)</b> | <b>Calculated NLR<br/>(95% CI)</b> | <b>Reported NLR<br/>(95% CI)</b> | <b>Other<br/>Measures of<br/>Diagnostic<br/>Accuracy</b> | <b>Imaging<br/>Accuracy</b> |
|----------------------------------------------|---------------------------|------------------------------------|----------------------------------|------------------------------------|----------------------------------|----------------------------------------------------------|-----------------------------|
| Schreiter, 2012 <sup>35</sup><br>Fair        | NR                        | Unable to<br>calculate             | NR                               | Unable to<br>calculate             | NR                               | NR                                                       | NR                          |
| Schreiter, 2012 <sup>35</sup><br>Fair        | NR                        | Unable to<br>calculate             | NR                               | Unable to<br>calculate             | NR                               | NR                                                       | NR                          |
| Van Binnebeek,<br>2016 <sup>36</sup><br>Poor | NR                        | Unable to<br>calculate             | NR                               | Unable to<br>calculate             | NR                               | NR                                                       | NR                          |
| Van Binnebeek,<br>2016 <sup>36</sup><br>Poor | NR                        | Unable to<br>calculate             | NR                               | Unable to<br>calculate             | NR                               | NR                                                       | NR                          |
| Van Binnebeek,<br>2016 <sup>36</sup><br>Poor | NR                        | Unable to<br>calculate             | NR                               | Unable to<br>calculate             | NR                               | NR                                                       | NR                          |
| Van Binnebeek,<br>2016 <sup>36</sup><br>Poor | NR                        | Unable to<br>calculate             | NR                               | Unable to<br>calculate             | NR                               | NR                                                       | NR                          |

**Table 4a. Studies of Diagnostic Accuracy of SSTR-PET for Identification of NETs**

| <b>Author, year<br/>Quality</b>              | <b>Tracer</b>                   | <b>Imaging Test</b> | <b>Definition of a Positive Test</b>                                                                                                                    | <b>Reference Standard</b> | <b>Type of Study</b> | <b>Country<br/>Setting</b>                     |
|----------------------------------------------|---------------------------------|---------------------|---------------------------------------------------------------------------------------------------------------------------------------------------------|---------------------------|----------------------|------------------------------------------------|
| Van Binnebeek,<br>2016 <sup>36</sup><br>Poor | <sup>68</sup> Ga-DOTATOC        | PET/CT              | A focus or an area of increased tracer uptake (with the surrounding tissue as a reference region) which could not be explained by physiological uptake. | Same as above             | Same as above        | Same as above                                  |
| Van Binnebeek,<br>2016 <sup>36</sup><br>Poor | <sup>111</sup> In-Pentetreotide | SPECT/CT            | A focus or an area of increased tracer uptake (with the surrounding tissue as a reference region) which could not be explained by physiological uptake. | Same as above             | Same as above        | Same as above                                  |
| Van Binnebeek,<br>2016 <sup>36</sup><br>Poor | <sup>68</sup> Ga-DOTATOC        | PET/CT              | A focus or an area of increased tracer uptake (with the surrounding tissue as a reference region) which could not be explained by physiological uptake. | Same as above             | Same as above        | Same as above                                  |
| Van Binnebeek,<br>2016 <sup>36</sup><br>Poor | <sup>111</sup> In-Pentetreotide | SPECT/CT            | A focus or an area of increased tracer uptake (with the surrounding tissue as a reference region) which could not be explained by physiological uptake. | Same as above             | Same as above        | Same as above                                  |
| Venkitaraman,<br>2014 <sup>37</sup><br>Good  | <sup>68</sup> Ga-DOTATOC        | PET/CT              | PET was assessed for areas of increased radiotracer uptake. Corresponding areas in the CT images and fused PET/CT images were corroborated.             | Biopsy                    | Prospective cohort   | India<br>Department of<br>Surgical Disciplines |

**Table 4a. Studies of Diagnostic Accuracy of SSTR-PET for Identification of NETs**

| <b>Author, year<br/>Quality</b>              | <b>Inclusion Criteria</b>                                                                                                                                                                                                                                                                                                | <b>Population Characteristics</b>                                                                                                                                                                                              | <b>Sample Size<br/>Proportion<br/>With Condition</b> | <b>Analysis Method</b>                                        | <b>TP</b> | <b>FP</b> | <b>FN</b> | <b>TN</b> | <b>Reported<br/>Sensitivity<br/>(95% CI)</b> |
|----------------------------------------------|--------------------------------------------------------------------------------------------------------------------------------------------------------------------------------------------------------------------------------------------------------------------------------------------------------------------------|--------------------------------------------------------------------------------------------------------------------------------------------------------------------------------------------------------------------------------|------------------------------------------------------|---------------------------------------------------------------|-----------|-----------|-----------|-----------|----------------------------------------------|
| Van Binnebeek,<br>2016 <sup>36</sup><br>Poor | Same as above                                                                                                                                                                                                                                                                                                            | Same as above                                                                                                                                                                                                                  | Same as above                                        | Detection of metastatic<br>NETs in bones                      | NR        | NR        | NR        | NR        | 100%                                         |
| Van Binnebeek,<br>2016 <sup>36</sup><br>Poor | Same as above                                                                                                                                                                                                                                                                                                            | Same as above                                                                                                                                                                                                                  | Same as above                                        | Detection of metastatic<br>NETs in bones                      | NR        | NR        | NR        | NR        | 34.5% (18 to<br>55.9)                        |
| Van Binnebeek,<br>2016 <sup>36</sup><br>Poor | Same as above                                                                                                                                                                                                                                                                                                            | Same as above                                                                                                                                                                                                                  | Same as above                                        | Detection of metastatic<br>NETs in lymph nodes                | NR        | NR        | NR        | NR        | 100%                                         |
| Van Binnebeek,<br>2016 <sup>36</sup><br>Poor | Same as above                                                                                                                                                                                                                                                                                                            | Same as above                                                                                                                                                                                                                  | Same as above                                        | Detection of metastatic<br>NETs in lymph nodes                | NR        | NR        | NR        | NR        | 70.5% (56.1 to<br>81.7)                      |
| Venkitaraman,<br>2014 <sup>37</sup><br>Good  | Patients with clinical suspicion<br>of pulmonary carcinoid tumour<br>based on history, examination,<br>or radiological findings.<br>Children <15 years, pregnant<br>women, uncontrolled diabetes<br>with blood sugar level of >140<br>mg/dl, and patients who<br>refused to give consent for the<br>study were excluded. | Age (mean, years): 34.22<br>(range: 16-71<br>Female: 53%<br>Typical carcinoid: 66%<br>Atypical carcinoid: 16%<br>Mucoepidermoid carcinoma: 6%<br>Adenoid cystic carcinoma: 3%<br>Schwannoma: 3%<br>Squamous cell carcinoma: 6% | N=32<br>100%                                         | Detection of pulmonary<br>carcinoids, per-patient<br>analysis | 25        | 0         | 1         | 6         | 96.15% (58.7 to<br>99.8)                     |



**Table 4a. Studies of Diagnostic Accuracy of SSTR-PET for Identification of NETs**

| <b>Author, year<br/>Quality</b>              | <b>Calculated<br/>Sensitivity<br/>(95% CI)</b> | <b>Reported<br/>Specificity<br/>(95% CI)</b> | <b>Calculated<br/>Specificity<br/>(95% CI)</b> | <b>Reported PPV<br/>(95% CI)</b> | <b>Calculated PPV<br/>(95% CI)</b> | <b>Reported NPV<br/>(95% CI)</b> | <b>Calculated NPV<br/>(95% CI)</b> |
|----------------------------------------------|------------------------------------------------|----------------------------------------------|------------------------------------------------|----------------------------------|------------------------------------|----------------------------------|------------------------------------|
| Van Binnebeek,<br>2016 <sup>36</sup><br>Poor | Unable to<br>calculate                         | NR                                           | Unable to<br>calculate                         | NR                               | Unable to<br>calculate             | NR                               | Unable to<br>calculate             |
| Van Binnebeek,<br>2016 <sup>36</sup><br>Poor | Unable to<br>calculate                         | NR                                           | Unable to<br>calculate                         | NR                               | Unable to<br>calculate             | NR                               | Unable to<br>calculate             |
| Van Binnebeek,<br>2016 <sup>36</sup><br>Poor | Unable to<br>calculate                         | NR                                           | Unable to<br>calculate                         | NR                               | Unable to<br>calculate             | NR                               | Unable to<br>calculate             |
| Van Binnebeek,<br>2016 <sup>36</sup><br>Poor | Unable to<br>calculate                         | NR                                           | Unable to<br>calculate                         | NR                               | Unable to<br>calculate             | NR                               | Unable to<br>calculate             |
| Venkitaraman,<br>2014 <sup>37</sup><br>Good  | 96.15% (80.36 to<br>99.90)                     | 100% (59.1 to<br>100)                        | 100% (54.07 to<br>100)                         | 100% (71.5 to<br>100)            | 100.00%                            | 85.71% (29.4 to<br>99.2)         | 85.71% (46.75 to<br>97.62)         |

**Table 4a. Studies of Diagnostic Accuracy of SSTR-PET for Identification of NETs**

| <b>Author, year<br/>Quality</b>              | <b>Reported<br/>AUROC</b> | <b>Calculated PLR<br/>(95% CI)</b> | <b>Reported PLR<br/>(95% CI)</b> | <b>Calculated NLR<br/>(95% CI)</b> | <b>Reported NLR<br/>(95% CI)</b> | <b>Other<br/>Measures of<br/>Diagnostic<br/>Accuracy</b> | <b>Imaging<br/>Accuracy</b> |
|----------------------------------------------|---------------------------|------------------------------------|----------------------------------|------------------------------------|----------------------------------|----------------------------------------------------------|-----------------------------|
| Van Binnebeek,<br>2016 <sup>36</sup><br>Poor | NR                        | Unable to<br>calculate             | NR                               | Unable to<br>calculate             | NR                               | NR                                                       | NR                          |
| Van Binnebeek,<br>2016 <sup>36</sup><br>Poor | NR                        | Unable to<br>calculate             | NR                               | Unable to<br>calculate             | NR                               | NR                                                       | NR                          |
| Van Binnebeek,<br>2016 <sup>36</sup><br>Poor | NR                        | Unable to<br>calculate             | NR                               | Unable to<br>calculate             | NR                               | NR                                                       | NR                          |
| Van Binnebeek,<br>2016 <sup>36</sup><br>Poor | NR                        | Unable to<br>calculate             | NR                               | Unable to<br>calculate             | NR                               | NR                                                       | NR                          |
| Venkitaraman,<br>2014 <sup>37</sup><br>Good  | NR                        | Unable to<br>calculate             | NR                               | 0.04 (0.01 to 0.26)                | NR                               | NR                                                       | 97%                         |

**Table 4a. Studies of Diagnostic Accuracy of SSTR-PET for Identification of NETs**

| <b>Author, year<br/>Quality</b>          | <b>Tracer</b>            | <b>Imaging Test</b> | <b>Definition of a Positive Test</b> | <b>Reference Standard</b>                                                                                                              | <b>Type of Study</b> | <b>Country<br/>Setting</b>  |
|------------------------------------------|--------------------------|---------------------|--------------------------------------|----------------------------------------------------------------------------------------------------------------------------------------|----------------------|-----------------------------|
| Venkitaraman, 2014 <sup>37</sup><br>Good | <sup>18</sup> F-FDG      | PET/CT              | Same as above                        | Same as above                                                                                                                          | Same as above        | Same as above               |
| Versari, 2010 <sup>38</sup><br>Fair      | <sup>68</sup> Ga-DOTATOC | PET/CT              | Unclear                              | Lesions detected by any imaging technique, unambiguous cytologic and/or histologic findings; and 6 month follow-up for negative scans. | Retrospective        | Italy<br>Endocrinology Unit |
| Versari, 2010 <sup>38</sup><br>Fair      | Not applicable           | MDCT                | Same as above                        | Same as above                                                                                                                          | Same as above        | Same as above               |
| Versari, 2010 <sup>38</sup><br>Fair      | <sup>68</sup> Ga-DOTATOC | PET/CT              | Same as above                        | Same as above                                                                                                                          | Same as above        | Same as above               |
| Versari, 2010 <sup>38</sup><br>Fair      | Not applicable           | MDCT                | Same as above                        | Same as above                                                                                                                          | Same as above        | Same as above               |

**Table 4a. Studies of Diagnostic Accuracy of SSTR-PET for Identification of NETs**

| <b>Author, year<br/>Quality</b>          | <b>Inclusion Criteria</b>                                                                                                                                                                               | <b>Population Characteristics</b>                  | <b>Sample Size<br/>Proportion<br/>With Condition</b> | <b>Analysis Method</b>                                    | <b>TP</b> | <b>FP</b> | <b>FN</b> | <b>TN</b> | <b>Reported<br/>Sensitivity<br/>(95% CI)</b> |
|------------------------------------------|---------------------------------------------------------------------------------------------------------------------------------------------------------------------------------------------------------|----------------------------------------------------|------------------------------------------------------|-----------------------------------------------------------|-----------|-----------|-----------|-----------|----------------------------------------------|
| Venkitaraman, 2014 <sup>37</sup><br>Good | Same as above                                                                                                                                                                                           | Same as above                                      | Same as above                                        | Detection of pulmonary carcinoids, per-patient analysis   | 18        | 5         | 8         | 1         | 78.26% (46.2 to 94.9)                        |
| Versari, 2010 <sup>38</sup><br>Fair      | Patients who consecutively underwent both EUS and <sup>68</sup> GA-DOTATOC PET at the author's institution between March 2007 and November 2008 for the suspicion of NET in the duodenopancreatic area. | Age (mean, years): 56; range: 21-80<br>Female: 42% | N=19<br>100%                                         | Detection of duodenopancreatic NETs, per-lesion analysis  | 22        | 1         | 4         | 5         | 87%                                          |
| Versari, 2010 <sup>38</sup><br>Fair      | Same as above                                                                                                                                                                                           | Same as above                                      | N=16<br>100%                                         | Detection of duodenopancreatic NETs, per-lesion analysis  | 16        | 1         | 6         | 4         | 72%                                          |
| Versari, 2010 <sup>38</sup><br>Fair      | Same as above                                                                                                                                                                                           | Same as above                                      | N=19<br>100%                                         | Detection of duodenopancreatic NETs, per-patient analysis | 13        | NR        | 0         | NR        | NR                                           |
| Versari, 2010 <sup>38</sup><br>Fair      | Same as above                                                                                                                                                                                           | Same as above                                      | N=16<br>100%                                         | Detection of duodenopancreatic NETs, per-patient analysis | 10        | NR        | 1         | NR        | NR                                           |

**Table 4a. Studies of Diagnostic Accuracy of SSTR-PET for Identification of NETs**

| <b>Author, year<br/>Quality</b>             | <b>Calculated<br/>Sensitivity<br/>(95% CI)</b> | <b>Reported<br/>Specificity<br/>(95% CI)</b> | <b>Calculated<br/>Specificity<br/>(95% CI)</b> | <b>Reported PPV<br/>(95% CI)</b> | <b>Calculated PPV<br/>(95% CI)</b> | <b>Reported NPV<br/>(95% CI)</b> | <b>Calculated NPV<br/>(95% CI)</b> |
|---------------------------------------------|------------------------------------------------|----------------------------------------------|------------------------------------------------|----------------------------------|------------------------------------|----------------------------------|------------------------------------|
| Venkitaraman,<br>2014 <sup>37</sup><br>Good | 69.23% (48.21 to<br>85.67)                     | 11.1% (3.4 to<br>47.5)                       | 16.67% (0.42 to<br>64.12)                      | 69.23% (42.1 to<br>85.2)         | 78.26% (69.86 to<br>84.83)         | 16.6% (6.4 to<br>61.5)           | 11.11% (1.87 to<br>45.03)          |
| Versari, 2010 <sup>38</sup><br>Fair         | 84.62% (65.13 to<br>95.64)                     | NR                                           | 83.33% (35.88 to<br>99.58)                     | NR                               | 95.65% (78.49 to<br>99.25)         | NR                               | 55.56% (32.15 to<br>76.73)         |
| Versari, 2010 <sup>38</sup><br>Fair         | 72.73% (49.78 to<br>89.27)                     | NR                                           | 80% (28.36 to<br>99.49)                        | NR                               | 94.12% (73.12 to<br>98.95)         | NR                               | 40% (22.86 to 60)                  |
| Versari, 2010 <sup>38</sup><br>Fair         | 100.00%                                        | NR                                           | Unable to<br>calculate                         | NR                               | Unable to<br>calculate             | NR                               | Unable to<br>calculate             |
| Versari, 2010 <sup>38</sup><br>Fair         | 90.90%                                         | NR                                           | Unable to<br>calculate                         | NR                               | Unable to<br>calculate             | NR                               | Unable to<br>calculate             |

**Table 4a. Studies of Diagnostic Accuracy of SSTR-PET for Identification of NETs**

| <b>Author, year<br/>Quality</b>             | <b>Reported<br/>AUROC</b> | <b>Calculated PLR<br/>(95% CI)</b> | <b>Reported PLR<br/>(95% CI)</b> | <b>Calculated NLR<br/>(95% CI)</b> | <b>Reported NLR<br/>(95% CI)</b> | <b>Other<br/>Measures of<br/>Diagnostic<br/>Accuracy</b> | <b>Imaging<br/>Accuracy</b> |
|---------------------------------------------|---------------------------|------------------------------------|----------------------------------|------------------------------------|----------------------------------|----------------------------------------------------------|-----------------------------|
| Venkitaraman,<br>2014 <sup>37</sup><br>Good | NR                        | 0.83 (0.53 to 1.29)                | NR                               | 1.85 (0.28 to 12.10)               | NR                               | NR                                                       | 59.37%                      |
| Versari, 2010 <sup>38</sup><br>Fair         | NR                        | 5.08 (0.84 to 30.61)               | NR                               | 0.18 (0.07 to 0.49)                | NR                               | NR                                                       | NR                          |
| Versari, 2010 <sup>38</sup><br>Fair         | NR                        | 3.64 (0.62 to 21.38)               | NR                               | 0.34 (0.15 to 0.77)                | NR                               | NR                                                       | NR                          |
| Versari, 2010 <sup>38</sup><br>Fair         | NR                        | Unable to calculate                | NR                               | Unable to calculate                | NR                               | NR                                                       | NR                          |
| Versari, 2010 <sup>38</sup><br>Fair         | NR                        | Unable to calculate                | NR                               | Unable to calculate                | NR                               | NR                                                       | NR                          |

Abbreviations: CE= contrast enhanced; CI=confidence interval; CT= computed tomography; EUS= endoscopic ultrasound; F= fluorine; FDG= fluorodeoxyglucose; Ga= Gallium; GEPNET= gastroenteropancreatic neuroendocrine tumor; HYNIC= hydrazinonicotinyl-Tyr3; In= indium; MBq; megabecquerel; MDCT= multidetector computed tomography; MCC= major complications or comorbidities; MEN= multiple endocrine neoplasia; MEN1= Multiple endocrine neoplasia type 1; MRI= magnetic resonance imaging; NET= neuroendocrine tumor; NLR=negative likelihood ratio; NPV=negative predictive value; NR= not reported; PET= positron emission tomography; PLR=positive likelihood ratio; PPV=positive predictive value; SPECT= single photon emission computed tomography; SSTR-PET= somatostatin receptor positron emission tomography.

**Table 4b. Summarized Characteristics of Studies of Diagnostic Accuracy of SSTR-PET for Identification of NETs**

| Author, year<br>Quality                 | Imaging Test                                                                                                                | N  | Mean Age<br>(years) | Female | Primary Tumor Site or<br>NET Location                                                                                                                         | Definition of a Positive Test                                                                                                                                                                                                                                                                                                                                                                                                                                                                                                          | Reference Standard                                                                                                                                               |
|-----------------------------------------|-----------------------------------------------------------------------------------------------------------------------------|----|---------------------|--------|---------------------------------------------------------------------------------------------------------------------------------------------------------------|----------------------------------------------------------------------------------------------------------------------------------------------------------------------------------------------------------------------------------------------------------------------------------------------------------------------------------------------------------------------------------------------------------------------------------------------------------------------------------------------------------------------------------------|------------------------------------------------------------------------------------------------------------------------------------------------------------------|
| Deppen, 2016 <sup>24</sup><br>Fair      | A: <sup>68</sup> Ga-DOTATATE<br>PET/CT<br>B: <sup>111</sup> In-Pentetreotide<br>SPECT or SPECT/CT                           | 97 | 53.7                | 58%    | Various NETs:<br>-Midgut carcinoid: 45%<br>-GEP: 23%<br>-Unknown primary: 12%<br>-Symptoms only: 7%<br>-Pulmonary: 7%<br>-Hindgut or rectal: 3%<br>-Other: 2% | Unclear                                                                                                                                                                                                                                                                                                                                                                                                                                                                                                                                | Single or multiple CT or MRI scans, surgical tissue confirmation, or combination thereof.                                                                        |
| Etchebehere, 2014 <sup>25</sup><br>Fair | A: <sup>68</sup> Ga-DOTATATE<br>PET/CT<br>B: 111-185 MBq (3-5 mCi) of <sup>99m</sup> Tc-HYNIC-octreotide SPECT/CT<br>C: MRI | 19 | 54.3                | 47%    | Various NETs, primary site:<br>-Bronchi: 22%<br>-Pancreas: 31%<br>-Gut: 31%                                                                                   | A: Intense focal uptake in comparison to the adjacent tissues was seen in the coronal, transaxial, and sagittal views.<br>B: Intense focal uptake in comparison to the adjacent tissues was seen in the coronal, transaxial, and sagittal views.<br>C: Analyzed in terms of number, size, location, and signal intensity and were compared with the T1-weighted and short- $\tau$ inversion recovery sequences to rule out false-positive findings. Lymph nodes were defined as malignant according to the diameter of the small axis. | Consensus among investigators at the end of the study evaluating all lesions by all methods, clinical follow-up, and biopsy of suggestive lesions when possible. |
| Froeling, 2012 <sup>26</sup><br>Fair    | A: <sup>68</sup> Ga-DOTATOC PET<br>B: <sup>68</sup> Ga-DOTATOC PET/CT<br>C: CT                                              | 21 | 41.4                | 48%    | Various NETs; all patients had MEN1 syndrome                                                                                                                  | Blinded radiologists and nuclear medicine physicians analyzed PET and CT separately first, then PET/CT. Lesions were characterized on a 3-point scale: non-MEN-associated lesions, equivocal lesions, MEN-associated lesions.                                                                                                                                                                                                                                                                                                          | Histopathologic proof or confirmed by clinical and radiologic follow-up.                                                                                         |

**Table 4b. Summarized Characteristics of Studies of Diagnostic Accuracy of SSTR-PET for Identification of NETs**

| Author, year<br>Quality                   | Imaging Test                                                                                                                          | N  | Mean Age<br>(years) | Female | Primary Tumor Site or<br>NET Location                                         | Definition of a Positive Test                                                                                                                                                                                                                                                                                                                                                                                                                   | Reference Standard                                                                                                                                                                            |
|-------------------------------------------|---------------------------------------------------------------------------------------------------------------------------------------|----|---------------------|--------|-------------------------------------------------------------------------------|-------------------------------------------------------------------------------------------------------------------------------------------------------------------------------------------------------------------------------------------------------------------------------------------------------------------------------------------------------------------------------------------------------------------------------------------------|-----------------------------------------------------------------------------------------------------------------------------------------------------------------------------------------------|
| Gabriel, 2007 <sup>27</sup><br>Good       | A: <sup>68</sup> Ga-DOTATOC PET<br>B: CT                                                                                              | 84 | 58.2                | 43%    | Various NETs (details<br>not reported)                                        | A: Clearly demarked findings with higher<br>tracer uptake compared with liver<br>uptake, tracer accumulation in structures<br>that did not take up tracer physiologically<br>or was higher than background activity,<br>or pancreatic head: irregular or<br>protrusive shape of finding; clear<br>delineation fro madjacent tissue with<br>higher uptake than liver uptake.<br>B: Specific appearance of malignant<br>disease derived from NET. | Histological confirmation and<br>repeated clinical examinations<br>with CT or MRI after 3 or 6<br>months for positive findings<br>and follow-up imaging after 6<br>months for negative scans. |
| Has Simsek,<br>2014 <sup>28</sup><br>Poor | A: <sup>68</sup> Ga-DOTATATE<br>PET/CT<br>B: <sup>18</sup> F-FDG PET/CT                                                               | 27 | 56                  | 63%    | GEP NET: 100%                                                                 | Significant accumulation of the tracer<br>based on cisual assessment                                                                                                                                                                                                                                                                                                                                                                            | Histology.                                                                                                                                                                                    |
| Kumar, 2011 <sup>29</sup><br>Poor         | A: <sup>68</sup> Ga-DOTATOC<br>PET/CT<br>B: <sup>18</sup> F-FDG PET/CT<br>C: Contrast enhanced<br>CT                                  | 20 | 42.5*               | 50%    | Pancreatic NET: 100%                                                          | A: Any non physiological uptake more<br>than surrounding tissue.<br>B: Any non physiological focal area of<br>increased <sup>18</sup> F-FDG uptake was looked<br>for, keeping physiological tracer<br>distribution in perspective.<br>C: Assessed by experienecd radiologists<br>for evidnce of primary/metastatic<br>disease.                                                                                                                  | Biopsy/histopathology                                                                                                                                                                         |
| Lococo, 2015 <sup>30</sup><br>Poor        | A: <sup>68</sup> Ga-DOTATOC or<br><sup>68</sup> Ga-DOTATATE or<br><sup>68</sup> Ga-DOTANOC<br>PET/CT<br>B: <sup>18</sup> F-FDG PET/CT | 33 | 59.7                | 64%    | Pulmonary carcinoid:<br>-Stage I: 49%<br>-Stage II: 36%<br>-Stage III/IV: 15% | Any focal accumulation of each tracer in<br>the lung nodule higher than the<br>surrounding uptake.                                                                                                                                                                                                                                                                                                                                              | Histological diagnosis.                                                                                                                                                                       |
| Morgat, 2016 <sup>31</sup><br>Fair        | A: <sup>68</sup> Ga-DOTATOC<br>PET/CT<br>B: <sup>111</sup> In-Pentetreotide<br>SPECT/CT<br>C: 2 ml/kg iohexol<br>contrast media CE-CT | 19 | 47                  | 63%    | Duodenopancreatic<br>NETs (all patients had<br>MEN1): 100%                    | A: Focally increased uptake, compared<br>with that of the surrounding tissue.<br>B: Increased uptake was assessed by<br>comparison with uptake by liver tissue,<br>according to the European Association of<br>Nuclear Medicine recommendations.<br>C: Radiologist's blinded reading                                                                                                                                                            | Combination of unblinded<br>analysis of the CE-CT with<br>complementary investigations<br>(MRI, EUS, <sup>18</sup> F-FDG PET, or<br>histology, performed on an<br>individual basis) results.  |



**Table 4b. Summarized Characteristics of Studies of Diagnostic Accuracy of SSTR-PET for Identification of NETs**

| Author, year<br>Quality                 | Imaging Test                                                                                                 | N   | Mean Age<br>(years) | Female | Primary Tumor Site or<br>NET Location                                                                                                                                                                                                           | Definition of a Positive Test                                                                                                          | Reference Standard                                                                                                                                |
|-----------------------------------------|--------------------------------------------------------------------------------------------------------------|-----|---------------------|--------|-------------------------------------------------------------------------------------------------------------------------------------------------------------------------------------------------------------------------------------------------|----------------------------------------------------------------------------------------------------------------------------------------|---------------------------------------------------------------------------------------------------------------------------------------------------|
| Putzer, 2009 <sup>32</sup><br>Fair      | A: <sup>68</sup> Ga-DOTATOC PET<br>B: CT                                                                     | 51  | Range: 32-<br>87    | 43%    | Various NETs<br>Primary site:<br>-Stomach: 6%<br>-Small bowel: 29%<br>-Colon: 6%<br>-Rectum: 4%<br>-Anal region: 2%<br>-Pancreas: 22%<br>-Prostate gland: 2%<br>-Bronchial carcinoid:<br>10%<br>-Unknown: 20%                                   | Clear demarcation of the lesion, with<br>tracer accumulation higher than that in<br>the liver and higher than physiologic<br>activity. | PET or SPECT bone<br>scintigraphy with PET or MRI<br>for discordant results; follow-<br>up control imaging within 6<br>months in ~60% of patients |
| Sadowski,<br>2016 <sup>33</sup><br>Poor | A: <sup>68</sup> Ga-DOTATATE<br>PET/CT<br>B: <sup>111</sup> In-Pentetreotide<br>SPECT/CT<br>C: CT and/or MRI | 131 | 51                  | 56%    | Focus on identificatoin of<br>unknown primary GEP<br>or metastatic NETs<br>GEP NETs<br>-Pancreatic: 27.5%<br>-Small/large bowel:<br>23.7%/3.0%<br>-Insulinoma: 5.3%<br>-Gastic: 5.3%<br>-Thymic carcinoid: 0.8%<br>-VIPoma: 1.5%<br>-Lung: 0.8% | Unclear                                                                                                                                | Multidisciplinary team<br>consensus using all imaging<br>modalities and clinical<br>information.                                                  |

**Table 4b. Summarized Characteristics of Studies of Diagnostic Accuracy of SSTR-PET for Identification of NETs**

| Author, year<br>Quality                  | Imaging Test                                                                                                                           | N  | Mean Age<br>(years) | Female | Primary Tumor Site or<br>NET Location                                                                                                                                                                           | Definition of a Positive Test                                                                                                                                                                                                                                                                                                                                                                                                                                                                                                                                                                                                                                                                                                                                                                    | Reference Standard                                                                                                                                                           |
|------------------------------------------|----------------------------------------------------------------------------------------------------------------------------------------|----|---------------------|--------|-----------------------------------------------------------------------------------------------------------------------------------------------------------------------------------------------------------------|--------------------------------------------------------------------------------------------------------------------------------------------------------------------------------------------------------------------------------------------------------------------------------------------------------------------------------------------------------------------------------------------------------------------------------------------------------------------------------------------------------------------------------------------------------------------------------------------------------------------------------------------------------------------------------------------------------------------------------------------------------------------------------------------------|------------------------------------------------------------------------------------------------------------------------------------------------------------------------------|
| Schraml,<br>2013 <sup>34</sup><br>Fair   | A: <sup>68</sup> Ga-DOTATOC<br>PET/CT<br>B: MRI<br>C: <sup>68</sup> Ga-DOTATOC PET<br>D: CT                                            | 51 | 57                  | 49%    | Various NETs<br>Primary site:<br>-GEP system: 63%<br>-Thyroid: 4%<br>-Bronchopulmonary<br>system: 4%<br>-Thymus: 4%<br>-Cervix: 4%<br>-Parotid gland: 2%<br>-Cranium: 2%<br>-Adrenal gland: 2%<br>-Unknown: 15% | A: In PET images, focal uptake<br>exceeding normal regional tracer<br>accumulation was classified as a<br>malignant lesion. This was combined<br>with the CT assessment using standard<br>reading criteria established in clinical<br>practice by taking into account<br>morphologic features and enhancement<br>characteristics.<br>B: Based on standard reading criteria<br>established in clinical practice by taking<br>into account morphologic features and<br>enhancement characteristics.<br>C: In PET images, focal uptake<br>exceeding normal regional tracer<br>accumulation was classified as a<br>malignant lesion.<br>D: Based on standard reading criteria<br>established in clinical practice by taking<br>into account morphologic features and<br>enhancement characteristics. | Consensus decision based on<br>correlation of all available<br>image data, histologic, and<br>surgical findings were<br>available, and clinical follow-<br>up of ≥12 months. |
| Schreiter,<br>2012 <sup>35</sup><br>Fair | A: <sup>68</sup> Ga-DOTATOC<br>PET/CT<br>B: MRI<br>C: CT<br>D: <sup>68</sup> Ga-DOTATOC PET<br>E: <sup>68</sup> Ga-DOTATOC PET-<br>MRI | 22 | 54.8                | 41%    | NETs with metastatic<br>disease<br>Primary tumors:<br>-Pancreas: 46%<br>-Ileum: 23%<br>-Stomach: 9%<br>-Duodenum: 9%<br>-Rectum: 5%<br>-Lungs: 5%<br>-Unknown: 5%                                               | Readers rated lesions on 3-point scale<br>(1=benign; 2=indifferent; 3=malignant),<br>those rated 3 were considered positive.                                                                                                                                                                                                                                                                                                                                                                                                                                                                                                                                                                                                                                                                     | Histopathology, follow-up<br>examinations (mean follow-up<br>was 29 months; range was 7-<br>72 months).                                                                      |

**Table 4b. Summarized Characteristics of Studies of Diagnostic Accuracy of SSTR-PET for Identification of NETs**

| Author, year<br>Quality                      | Imaging Test                                                                            | N  | Mean Age<br>(years) | Female | Primary Tumor Site or<br>NET Location                                                                                                                                                                  | Definition of a Positive Test                                                                                                                                    | Reference Standard                                                                                                                                    |
|----------------------------------------------|-----------------------------------------------------------------------------------------|----|---------------------|--------|--------------------------------------------------------------------------------------------------------------------------------------------------------------------------------------------------------|------------------------------------------------------------------------------------------------------------------------------------------------------------------|-------------------------------------------------------------------------------------------------------------------------------------------------------|
| Van Binnebeek,<br>2016 <sup>36</sup><br>Poor | A: <sup>68</sup> Ga-DOTATOC<br>PET/CT<br>B: <sup>111</sup> In-Pentetreotide<br>SPECT/CT | 53 | 59                  | 57%    | Various NETs, primary<br>site (all had metastatic<br>disease):<br>-GEP: 74%<br>-Lung: 7.5%<br>-Merckel cell<br>carcinomas: 3.9%<br>-Breast: 1.8%<br>-Kidney: 1.8%<br>-Other/unknown: 11%               | A focus or an area of increased tracer<br>uptake (with the surrounding tissue as a<br>reference region) which could not be<br>explained by physiological uptake. | Maintenance of lesions on<br>follow-up scans.                                                                                                         |
| Venkitaraman,<br>2014 <sup>37</sup><br>Good  | A: <sup>68</sup> Ga-DOTATOC<br>PET/CT<br>B: <sup>18</sup> F-FDG PET/CT                  | 32 | 34.22               | 53%    | Pulmonary tumors:<br>-Typical carcinoid: 66%<br>-Atypical carcinoid: 16%<br>-Mucoepidermoid<br>carcinoma: 6%<br>-Adenoid cystic<br>carcinoma: 3%<br>-Schwannoma: 3%<br>-Squamous cell<br>carcinoma: 6% | PET was assessed for areas of<br>increased radiotracer uptake.<br>Corresponding areas in the CT images<br>and fused PET/CT images were<br>corroborated.          | Biopsy                                                                                                                                                |
| Versari, 2010 <sup>38</sup><br>Fair          | A: <sup>68</sup> Ga-DOTATOC<br>PET/CT<br>B: MDCT                                        | 19 | 56                  | 42%    | Duodenopancreatic<br>NETs: 100%                                                                                                                                                                        | Unclear                                                                                                                                                          | Lesions detected by any<br>imaging technique,<br>unambiguous cytologic and/or<br>histologic findings; and 6<br>month follow-up for negative<br>scans. |

\*Values are median

Abbreviations: CE= contrast enhanced; CT= computed tomography; EUS= endoscopic ultrasound; F= fluorine; FDG= fluorodeoxyglucose; Ga= Gallium; GEP= gastroenteropancreatic; HYNIC= hydrazinonicotinyl-Tyr3; In= indium; MBq; megabecquerel; MDCT= multidetector computed tomography; MEN= multiple endocrine neoplasia; MEN1= Multiple endocrine neoplasia type 1; MRI= magnetic resonance imaging; NET= neuroendocrine tumor; PET= positron emission tomography; SPECT= single photon emission computed tomography.

**Table 4c. Studies of Diagnostic Accuracy of SSTR-PET for Identification of NETs**

| Author, Year<br>Quality                                | Imaging Test                                                                                                             | Analysis Method                                                                                                       | Sensitivity<br>(95% CI)                                         | Specificity<br>(95% CI)                                           | PPV (95% CI)                                                      | NPV (95% CI)                                                     | PLR (95% CI)                                                   | NLR (95% CI)                                             | Imaging<br>Accuracy    |
|--------------------------------------------------------|--------------------------------------------------------------------------------------------------------------------------|-----------------------------------------------------------------------------------------------------------------------|-----------------------------------------------------------------|-------------------------------------------------------------------|-------------------------------------------------------------------|------------------------------------------------------------------|----------------------------------------------------------------|----------------------------------------------------------|------------------------|
| <b>SSTR-PET vs. OctreoScan</b>                         |                                                                                                                          |                                                                                                                       |                                                                 |                                                                   |                                                                   |                                                                  |                                                                |                                                          |                        |
| <i>Detection of NETs</i>                               |                                                                                                                          |                                                                                                                       |                                                                 |                                                                   |                                                                   |                                                                  |                                                                |                                                          |                        |
| Deppen,<br>2016 <sup>24</sup><br>Fair                  | A: <sup>68</sup> Ga-DOTATATE<br>PET/CT<br>B: <sup>111</sup> In-Pentetreotide<br>SPECT or SPECT/CT                        | Detection of cancer<br>or progression, all<br>types, per-patient<br>analysis, only those<br>who underwent<br>SPECT/CT | A: 96.55% (82.24 to<br>99.91)*<br>B: 82.76% (64.23 to<br>94.15) | A: 94.74% (73.97<br>to 99.87))*<br>B: 94.74% (73.97<br>to 99.87)* | A: 96.55%<br>(80.58 to<br>99.47))*<br>B: 96% (77.96 to<br>99.39)* | A: 94.74%<br>(72.34 to 99.20)*<br>B: 78.26%<br>(61.69 to 88.95)* | A: 18.34 (2.72<br>to 123.76)*<br>B: 15.72 (2.32<br>to 106.71)* | A: 0.04 (0.01 to<br>0.25)*<br>B: 0.18 (0.08 to<br>0.41)* | 0.94 (0.89 to<br>1.00) |
| Etchebehere,<br>2014 <sup>25</sup><br>Fair             | A: <sup>68</sup> Ga-DOTATATE<br>PET/CT<br>B: 111-185 MBq (3-5<br>mCi) of <sup>99m</sup> Tc-HYNIC-<br>octreotide SPECT/CT | Detection of NETs,<br>per-lesion analysis                                                                             | A: 96%<br>B: 60%                                                | A: 97%<br>B: 99%                                                  | A: 94%<br>B: 96%                                                  | A: 98%<br>B: 83%                                                 | Unable to<br>calculate                                         | Unable to<br>calculate                                   | A: 97%<br>B: 86%       |
| <i>Detection of GEP NETs</i>                           |                                                                                                                          |                                                                                                                       |                                                                 |                                                                   |                                                                   |                                                                  |                                                                |                                                          |                        |
| Morgat,<br>2016 <sup>31</sup><br>Fair                  | A: <sup>68</sup> Ga-DOTATOC<br>PET/CT<br>B: <sup>111</sup> In-Pentetreotide<br>SPECT/CT                                  | Detection of<br>dpNETs, per-lesion<br>analysis                                                                        | A: 76% (64.75 to<br>85.11)*<br>B: 20% (11.65 to<br>30.83)*      | A: 100% (39.76 to<br>100)*<br>B: 50% (6.76 to<br>93.24)*          | A: 100%*<br>B: 88.24%<br>(71.82 to 95.67)*                        | A: 18.18%<br>(12.93 to 24.95)*<br>B: 3.23% (1.23<br>to 8.21)*    | A: Unable to<br>calculate<br>B: 0.40 (0.14 to<br>1.18)*        | A: 0.24 (0.16 to<br>0.36)*<br>B: 1.60 (0.60 to<br>4.29)* | NR                     |
| <i>Detection of Unknown Primary or Metastatic NETs</i> |                                                                                                                          |                                                                                                                       |                                                                 |                                                                   |                                                                   |                                                                  |                                                                |                                                          |                        |
| Sadowski,<br>2016 <sup>33</sup><br>Poor                | A: <sup>68</sup> Ga-DOTATATE<br>PET/CT<br>B: <sup>111</sup> In-Pentetreotide<br>SPECT/CT                                 | Detection of GEP<br>NETs, per-lesion<br>analysis                                                                      | A: 95.1% (92.4 to<br>96.8)<br>B: 30.9% (25.0 to<br>37.5)        | NR                                                                | Unable to<br>calculate                                            | Unable to<br>calculate                                           | Unable to<br>calculate                                         | Unable to<br>calculate                                   | NR                     |
| <i>Detection of metastatic disease</i>                 |                                                                                                                          |                                                                                                                       |                                                                 |                                                                   |                                                                   |                                                                  |                                                                |                                                          |                        |
| Van<br>Binnebeek,<br>2016 <sup>36</sup><br>Poor        | A: <sup>68</sup> Ga-DOTATOC<br>PET/CT<br>B: <sup>111</sup> In-Pentetreotide<br>SPECT/CT                                  | Detection of NETs,<br>per-lesion analysis                                                                             | A: 99.9% (99.3 to<br>100)<br>B: 60.1% (48.5 to<br>70.2)         | NR                                                                | Unable to<br>calculate                                            | Unable to<br>calculate                                           | Unable to<br>calculate                                         | Unable to<br>calculate                                   | NR                     |
| <b>SSTR-PET vs. <sup>18</sup>FDG-PET</b>               |                                                                                                                          |                                                                                                                       |                                                                 |                                                                   |                                                                   |                                                                  |                                                                |                                                          |                        |
| <i>Detection of GEP NETs</i>                           |                                                                                                                          |                                                                                                                       |                                                                 |                                                                   |                                                                   |                                                                  |                                                                |                                                          |                        |
| Has Simsek,<br>2014 <sup>28</sup><br>Poor              | A: <sup>68</sup> Ga-DOTATATE<br>PET/CT<br>B: <sup>18</sup> F-FDG PET/CT                                                  | Detection of GEP<br>NETs overall, per-<br>lesion analysis                                                             | A: 95% (NR)<br>B: 37% (NR)                                      | NR                                                                | A: 93.8% (NR)<br>B: 36.2% (NR)                                    | Unable to<br>calculate                                           | Unable to<br>calculate                                         | Unable to<br>calculate                                   | NR                     |
| Kumar,<br>2011 <sup>29</sup><br>Poor                   | A: <sup>68</sup> Ga-DOTATOC<br>PET/CT<br>B: <sup>18</sup> F-FDG PET/CT                                                   | Detection of primary<br>NETs, per-patient<br>analysis                                                                 | A: 100% (83.16 to<br>100)*<br>B: 25% (3.19 to<br>65.09)*        | NR                                                                | A: 100% (83.16<br>to 100)*<br>B: 100% (63.06<br>to 100)*          | Unable to<br>calculate                                           | A: 1*<br>B: 0.25*                                              | Unable to<br>calculate                                   | NR                     |

**Table 4c. Studies of Diagnostic Accuracy of SSTR-PET for Identification of NETs**

| Author, Year<br>Quality                      | Imaging Test                                                                                                                          | Analysis Method                                                   | Sensitivity<br>(95% CI)                                          | Specificity<br>(95% CI)                                          | PPV (95% CI)                                                      | NPV (95% CI)                                                     | PLR (95% CI)                                               | NLR (95% CI)                                              | Imaging<br>Accuracy    |
|----------------------------------------------|---------------------------------------------------------------------------------------------------------------------------------------|-------------------------------------------------------------------|------------------------------------------------------------------|------------------------------------------------------------------|-------------------------------------------------------------------|------------------------------------------------------------------|------------------------------------------------------------|-----------------------------------------------------------|------------------------|
| <i>Detection of Pulmonary Carcinoids</i>     |                                                                                                                                       |                                                                   |                                                                  |                                                                  |                                                                   |                                                                  |                                                            |                                                           |                        |
| Lococo,<br>2015 <sup>30</sup><br>Poor        | A: <sup>68</sup> Ga-DOTATOC or<br><sup>68</sup> Ga-DOTATATE or<br><sup>68</sup> Ga-DOTANOC<br>PET/CT<br>B: <sup>18</sup> F-FDG PET/CT | Detection of<br>pulmonary<br>carcinoids, per-<br>patient analysis | A: 78.79% (61.09 to<br>91.02)*<br>B: 54.55% (36.35 to<br>71.89)* | NR                                                               | A: 100%*<br>B: 100% (89.42<br>to 100)*                            | Unable to<br>calculate                                           | A: 0.79*<br>B: 0.55*                                       | Unable to<br>calculate                                    | NR                     |
| Venkitaraman<br>, 2014 <sup>37</sup><br>Fair | A: <sup>68</sup> Ga-DOTATOC<br>PET/CT<br>B: <sup>18</sup> F-FDG PET/CT                                                                | Detection of<br>pulmonary<br>carcinoids, per-<br>patient analysis | A: 96.15% (80.36 to<br>99.90)*<br>B: 69.23% (48.21 to<br>85.67)* | A: 100% (54.07 to<br>100)*<br>B: 16.67% (0.42 to<br>64.12)*      | A: 100% (71.5 to<br>100)*<br>B: 78.26%<br>(69.86 to 84.83)*       | A: 85.71%<br>(46.75 to 97.62)*<br>B: 11.11% (1.87<br>to 45.03)*  | A: Unable to<br>calculate<br>B: 0.83 (0.53 to<br>1.29)*    | A: 0.04 (0.01 to<br>0.26)*<br>B: 1.85 (0.28 to<br>12.10)* | A: 96.87%<br>B: 59.37% |
| <i>Detection of Metastatic Disease</i>       |                                                                                                                                       |                                                                   |                                                                  |                                                                  |                                                                   |                                                                  |                                                            |                                                           |                        |
| Kumar,<br>2011 <sup>29</sup><br>Poor         | A: <sup>68</sup> Ga-DOTATOC<br>PET/CT<br>B: <sup>18</sup> F-FDG PET/CT                                                                | Detection of<br>metastatic disease,<br>per-patient analysis       | A: 92.8% (66 to 98.8)<br>B: 20% (3.1 to 55.5)                    | A: 100% (54 to<br>100)<br>B: 100% (16.5 to<br>100)               | A: 100% (75.1 to<br>100)<br>B: 100% (19.2 to<br>100)              | A: 85.7% (42.2<br>to 97.6)*<br>B: 11.1% (1.8 to<br>48.2)*        | Unable to<br>calculate                                     | Unable to<br>calculate                                    | NR                     |
| <b>SSTR-PET vs. CT/MRI</b>                   |                                                                                                                                       |                                                                   |                                                                  |                                                                  |                                                                   |                                                                  |                                                            |                                                           |                        |
| <i>Detection of NETs</i>                     |                                                                                                                                       |                                                                   |                                                                  |                                                                  |                                                                   |                                                                  |                                                            |                                                           |                        |
| Etchebehere,<br>2014 <sup>25</sup><br>Fair   | A: <sup>68</sup> Ga-DOTATATE<br>PET/CT<br>B: MRI                                                                                      | Detection of NETs,<br>per-lesion analysis                         | A: 96%<br>B: 72%                                                 | A: 97%<br>B: 100%                                                | A: 94%<br>B: 100%                                                 | A: 98%<br>B: 88%                                                 | Unable to<br>calculate                                     | Unable to<br>calculate                                    | A: 97%<br>B: 91%       |
| Gabriel,<br>2007 <sup>27</sup><br>Good       | A: <sup>68</sup> Ga-DOTATOC PET<br>B: CT                                                                                              | Detection of NETs,<br>per-patient analysis                        | A: 97.18% (90.19 to<br>99.66)*<br>B: 61.19% (48.50 to<br>72.86)* | A: 92.31% (63.97<br>to 99.81)*<br>B: 70.59% (44.04<br>to 89.69)* | A: 98.57% (<br>91.30 to 99.78)*<br>B: 89.13%<br>(79.30 to 94.61)* | A: 85.71%<br>(60.26 to 95.96)*<br>B: 31.58%<br>(23.10 to 41.49)* | A: 12.63 (1.92<br>to 83.09)*<br>B: 2.08 (0.97 to<br>4.45)* | A: 0.03 (0.01 to<br>0.12)*<br>B: 0.55 (0.36 to<br>0.84)*  | A: 96%<br>B: 63%       |
| <i>Detection of GEP NETs</i>                 |                                                                                                                                       |                                                                   |                                                                  |                                                                  |                                                                   |                                                                  |                                                            |                                                           |                        |
| Froeling,<br>2012 <sup>26</sup><br>Fair      | A: <sup>68</sup> Ga-DOTATOC PET<br>B: <sup>68</sup> Ga-DOTATOC<br>PET/CT<br>C: CT                                                     | Detection of NET<br>lesions                                       | A: 85% (NR)<br>B: 91.7% (NR)<br>C: 43.3% (NR)                    | A: 96.8% (NR)<br>B: 93.5% (NR)<br>C: 61.3% (NR)                  | Unable to<br>calculate                                            | Unable to<br>calculate                                           | Unable to<br>calculate                                     | Unable to<br>calculate                                    | NR                     |
| Kumar,<br>2011 <sup>29</sup><br>Poor         | A: <sup>68</sup> Ga-DOTATOC<br>PET/CT<br>B: Contrast enhanced<br>CT                                                                   | Detection of primary<br>NETs, per-patient<br>analysis             | A: 100% (83.16 to<br>100)*<br>B: 84.21% (60.42 to<br>96.62)*     | A: NR<br>B: 0% (0 to<br>84.19)*                                  | A: 100% (83.16<br>to 100)*<br>B: 88.89%<br>(86.82 to 90.67)*      | Unable to<br>calculate                                           | A: 1*<br>B: 0.84 (0.69 to<br>1.02)*                        | Unable to<br>calculate                                    | NR                     |

**Table 4c. Studies of Diagnostic Accuracy of SSTR-PET for Identification of NETs**

| Author, Year<br>Quality                | Imaging Test                                                                                | Analysis Method                                             | Sensitivity<br>(95% CI)                                                                                                              | Specificity<br>(95% CI)                                                                                                       | PPV (95% CI)                                                                                                   | NPV (95% CI)                                                                                                                         | PLR (95% CI)                                                                                                           | NLR (95% CI)                                                                                                         | Imaging<br>Accuracy                                                                            |
|----------------------------------------|---------------------------------------------------------------------------------------------|-------------------------------------------------------------|--------------------------------------------------------------------------------------------------------------------------------------|-------------------------------------------------------------------------------------------------------------------------------|----------------------------------------------------------------------------------------------------------------|--------------------------------------------------------------------------------------------------------------------------------------|------------------------------------------------------------------------------------------------------------------------|----------------------------------------------------------------------------------------------------------------------|------------------------------------------------------------------------------------------------|
| Morgat,<br>2016 <sup>31</sup><br>Fair  | A: <sup>68</sup> Ga-DOTATOC<br>PET/CT<br>B: 2 ml/kg iohexol<br>contrast media CE-CT         | Detection of<br>dpNETs, per-lesion<br>analysis              | A: 76% (64.75 to<br>85.11)*<br>B: 60% (48.04 to<br>71.15)*                                                                           | A: 100% (39.76 to<br>100)*<br>B: 50% (6.76 to<br>93.24)*                                                                      | A: 100%*<br>B: 95.74%<br>(89.25 to 98.39)*                                                                     | A: 18.18%<br>(12.93 to 24.95)*<br>B: 6.25% (2.35<br>to 15.58)*                                                                       | A: Unable to<br>calculate<br>B: 1.20 (0.44 to<br>3.25)*                                                                | A: 0.24 (0.16 to<br>0.36)*<br>B: 0.80 (0.29 to<br>2.22)*                                                             | NR                                                                                             |
| Versari,<br>2010 <sup>38</sup><br>Fair | A: <sup>68</sup> Ga-DOTATOC<br>PET/CT<br>B: MDCT                                            | Detection of GEP<br>NETs, per-patient<br>analysis           | A: 100%*<br>B: 90.9%*                                                                                                                | NR                                                                                                                            | Unable to<br>calculate                                                                                         | Unable to<br>calculate                                                                                                               | Unable to<br>calculate                                                                                                 | Unable to<br>calculate                                                                                               | NR                                                                                             |
| Versari,<br>2010 <sup>38</sup><br>Fair | A: <sup>68</sup> Ga-DOTATOC<br>PET/CT<br>B: MDCT                                            | Detection of GEP<br>NETs, per-lesion<br>analysis            | A: 84.62% (65.13 to<br>95.64)*<br>B: 72.73% (49.78 to<br>89.27)*                                                                     | A: 83.33% (35.88<br>to 99.58)*<br>B: 80% (28.36 to<br>99.49)*                                                                 | A: 95.65%<br>(78.49 to 99.25)*<br>B: 94.12%<br>(73.12 to 98.95)*                                               | A: 55.56%<br>(32.15 to 76.73)*<br>B: 40% (22.86 to<br>60)*                                                                           | A: 5.08 (0.84 to<br>30.61)*<br>B: 3.64 (0.62 to<br>21.38)*                                                             | A: 0.18 (0.07 to<br>0.49)*<br>B: 0.34 (0.15 to<br>0.77)*                                                             | NR                                                                                             |
| <i>Detection of Metastatic Disease</i> |                                                                                             |                                                             |                                                                                                                                      |                                                                                                                               |                                                                                                                |                                                                                                                                      |                                                                                                                        |                                                                                                                      |                                                                                                |
| Kumar,<br>2011 <sup>29</sup><br>Poor   | A: <sup>68</sup> Ga-DOTATOC<br>PET/CT<br>B: Contrast enhanced<br>CT                         | Detection of<br>metastatic disease,<br>per-patient analysis | A: 92.8% (66 to 98.8)<br>B: 57.1% (28.9 to<br>82.2)                                                                                  | A: 100% (54 to<br>100)<br>B: 100% (54 to<br>100)                                                                              | A: 100% (75.1 to<br>100)<br>B: 100% (62.9 to<br>100)                                                           | A: 85.7% (42.2<br>to 97.6)*<br>B: 50% (21.2 to<br>78.7)*                                                                             | Unable to<br>calculate                                                                                                 | Unable to<br>calculate                                                                                               | NR                                                                                             |
| Putzer,<br>2009 <sup>32</sup><br>Fair  | A: <sup>68</sup> Ga-DOTATOC PET<br>B: CT                                                    | Detection of bone<br>metastases, per-<br>patient analysis   | A: 97.37% (86.19 to<br>99.93)*<br>B: 57.89% (40.82 to<br>73.69)*                                                                     | A: 92.31% (63.97<br>to 99.81)*<br>B: 100% (75.29 to<br>100)*                                                                  | A: 97.37%<br>(84.90 to 99.59)*<br>B: 100%*                                                                     | A: 92.31%<br>(63.29 to 98.82)*<br>B: 44.83%<br>(35.88 to 54.12)*                                                                     | A: 12.66 (1.92<br>to 83.27)*<br>B: Unable to<br>calculate                                                              | A: 0.03 (0.00 to<br>0.20)*<br>B: 0.42 (0.29 to<br>0.61)*                                                             | NR                                                                                             |
| Schraml,<br>2013 <sup>34</sup><br>Fair | A: <sup>68</sup> Ga-DOTATOC<br>PET/CT<br>B: MRI<br>C: <sup>68</sup> Ga-DOTATOC PET<br>D: CT | Detection of<br>metastatic disease,<br>per-patient analysis | A: 97.56% (87.14 to<br>99.94)*<br>B: 97.56% (87.14 to<br>99.94)*<br>C: 87.80% (73.80 to<br>95.92)*<br>D: 90.24% (76.87 to<br>97.28)* | A: 100% (69.15 to<br>100)*<br>B: 90% (55.50 to<br>99.75)*<br>C: 90.00% (55.50<br>to 99.75)*<br>D: 90.00% (55.50<br>to 99.75)* | A: 100%*<br>B: 97.56%<br>(86.16 to 99.61)*<br>C: 97.30%<br>(84.82 to 99.57)*<br>D: 97.37%<br>(85.18 to 99.58)* | A: 90.91%<br>(59.06 to 98.58)*<br>B: 90.00%<br>(56.22 to 98.44)*<br>C: 64.29%<br>(43.56 to 80.76)*<br>D: 69.23%<br>(46.44 to 85.38)* | A: Unable to<br>calculate<br>B: 9.76 (1.52 to<br>62.67)*<br>C: 8.78 (1.36<br>to 56.57)*<br>D: 9.02 (1.40<br>to 58.09)* | A: 0.02 (0.00 to<br>0.17)*<br>B: 0.03 (0.00 to<br>0.19)*<br>C: 0.14 (0.06 to<br>0.32)*<br>D: 0.11 (0.04 to<br>0.28)* | A: 98% (90 to<br>100)<br>B: 96% (87 to<br>100)<br>C: 88% (76 to<br>96)<br>D: 90% (76 to<br>96) |

**Table 4c. Studies of Diagnostic Accuracy of SSTR-PET for Identification of NETs**

| Author, Year<br>Quality                                | Imaging Test                                                                                                                          | Analysis Method                                                                    | Sensitivity<br>(95% CI)                                                                                                                            | Specificity<br>(95% CI)                                                                                                                            | PPV (95% CI)                                                                                                                                   | NPV (95% CI)                                                                                                                                     | PLR (95% CI)           | NLR (95% CI)           | Imaging<br>Accuracy |
|--------------------------------------------------------|---------------------------------------------------------------------------------------------------------------------------------------|------------------------------------------------------------------------------------|----------------------------------------------------------------------------------------------------------------------------------------------------|----------------------------------------------------------------------------------------------------------------------------------------------------|------------------------------------------------------------------------------------------------------------------------------------------------|--------------------------------------------------------------------------------------------------------------------------------------------------|------------------------|------------------------|---------------------|
| Schreiter,<br>2012 <sup>35</sup><br>Fair               | A: <sup>68</sup> Ga-DOTATOC<br>PET/CT<br>B: MRI<br>C: CT<br>D: <sup>68</sup> Ga-DOTATOC PET<br>E: <sup>68</sup> Ga-DOTATOC<br>PET-MRI | Differentiation of<br>liver metastases<br>from NET lesions,<br>per-lesion analysis | A: 73.5% (64.3 to<br>81.3)<br>B: 87.6% (80.1 to<br>93.1)<br>C: 68.1% (58.7 to<br>76.6)<br>D: 53.1% (43.5 to<br>62.5)<br>E: 91.2% (84.3 to<br>95.7) | A: 88.2% (78.6 to<br>99.1)<br>B: 86.8% (76.4 to<br>93.8)<br>C: 85.3% (74.6 to<br>92.7)<br>D: 79.4% (74.6 to<br>92.7)<br>E: 95.6% (87.6 to<br>99.1) | A: 93.4% (87.4<br>to 97.1)<br>B: 92.6% (86.5<br>to 96.6)<br>C: 91.9% (85.6<br>to 96)<br>D: 89.0% (85.6<br>to 96)<br>E: 97.4% (92.6<br>to 99.5) | A: 69.4% (59.3<br>to 78.3)<br>B: 82.9% (73 to<br>90.3)<br>C: 65.4% (55.4<br>to 74.4)<br>D: 56.2% (46.9<br>to 65.2)<br>E: 87.2% (77.7<br>to 93.7) | Unable to<br>calculate | Unable to<br>calculate | NR                  |
| <i>Detection of Unknown Primary or Metastatic NETs</i> |                                                                                                                                       |                                                                                    |                                                                                                                                                    |                                                                                                                                                    |                                                                                                                                                |                                                                                                                                                  |                        |                        |                     |
| Sadowski,<br>2016 <sup>33</sup><br>Poor                | A: <sup>68</sup> Ga-DOTATATE<br>PET/CT<br>B: CT and/or MRI                                                                            | Detection of GEP<br>NETs, per-lesion<br>analysis                                   | A: 95.1% (92.4 to<br>96.8)<br>B: 45.3% (37.9 to<br>52.9)                                                                                           | NR                                                                                                                                                 | Unable to<br>calculate                                                                                                                         | Unable to<br>calculate                                                                                                                           | Unable to<br>calculate | Unable to<br>calculate | NR                  |

\*Calculated

Abbreviations: CE= contrast enhanced; CI=confidence interval; CT= computed tomography; F= fluorine; FDG= fluorodeoxyglucose; Ga= gallium; GEP= gastroenteropancreatic; GEPNET= gastroenteropancreatic neuroendocrine tumors; HYNIC= hydrazinonicotinyl-Tyr3; In= indium; MBq; megabecquerel; MDCT= multidetector computed tomography; MRI= magnetic resonance imaging; NET= neuroendocrine tumor; NLR=negative likelihood ratio; NPV= negative predictive value; NR= not reported; PET= positron emission tomography; PLR=positive likelihood ratio; PPV= positive predictive value; SPECT= single photon emission computed tomography.

**Table 4d. Studies of Treatment Changes due to SSSTR-PET for Identification of NETs**

| Author, Year                 | Study Design                | Population Characteristics                                                                                                                                                                                                                                                                  | Eligibility Criteria                                                                                                                                                                                                                                                                                                                                                                        | Number Approached, Eligible, Enrolled, Analyzed                | Country & Setting                                                                                         | Duration of Follow-up | Attrition |
|------------------------------|-----------------------------|---------------------------------------------------------------------------------------------------------------------------------------------------------------------------------------------------------------------------------------------------------------------------------------------|---------------------------------------------------------------------------------------------------------------------------------------------------------------------------------------------------------------------------------------------------------------------------------------------------------------------------------------------------------------------------------------------|----------------------------------------------------------------|-----------------------------------------------------------------------------------------------------------|-----------------------|-----------|
| Deppen, 2016 <sup>24</sup>   | Prospective cross-sectional | Age (mean, years): 53.7 (SD 11)<br>Female: 58%<br>NET type:<br>-Midgut carcinoid: 45%<br>-GEP: 23%<br>-Unknown primary: 12%<br>-Symptoms only: 7%<br>-Pulmonary: 7%<br>-Hindgut or rectal: 3%<br>-Other: 2%<br>Ki-67 category:<br>-Low: 24<br>-Intermediate: 37<br>-High: 6<br>-Missing: 30 | Enrolled patients having a proven diagnosis of NET, prospective analysis of safety and toxicity data and <sup>68</sup> Ga-DOTATATE scan findings. Patients were excluded if no prior <sup>111</sup> In-Pentetreotide was available, time between scans exceeded 3 years, no <sup>111</sup> In-Pentetreotide scan available after a major surgical intervention occurring between the scans. | Approached: NR<br>Eligible: NR<br>Enrolled: 97<br>Analyzed: 78 | USA<br>Setting unclear                                                                                    | NR                    | NR        |
| Frilling, 2010 <sup>45</sup> | Prospective cohort          | Age (mean, years): 52; range: 24-76<br>Female: 52%<br>Primary tumor<br>-Pancreas: 52%<br>-Gastrointestinal tract: 37%<br>-Biliary system: 6%<br>-Lung: 5%                                                                                                                                   | NR                                                                                                                                                                                                                                                                                                                                                                                          | Approached: NR<br>Eligible: NR<br>Enrolled: 52<br>Analyzed: 52 | Germany<br>Departments of Nuclear Medicine and Diagnostic and Interventional Radiology and Neuroradiology | NR                    | NR        |



**Table 4d. Studies of Treatment Changes due to SSTR-PET for Identification of NETs**

| <b>Author, Year</b>          | <b>Confounders Adjusted for in Analysis</b> | <b>Imaging Tests</b>                                                          | <b>Outcomes</b>                                                                                                                               | <b>Adverse Events/Harms</b>                                                                                                                                                                                                       | <b>Sponsor</b>                                                                                                                                                       | <b>Quality Rating</b> |
|------------------------------|---------------------------------------------|-------------------------------------------------------------------------------|-----------------------------------------------------------------------------------------------------------------------------------------------|-----------------------------------------------------------------------------------------------------------------------------------------------------------------------------------------------------------------------------------|----------------------------------------------------------------------------------------------------------------------------------------------------------------------|-----------------------|
| Deppen, 2016 <sup>24</sup>   | NR                                          | <sup>68</sup> Ga-DOTATATE PET/CT vs. <sup>111</sup> In-pentetreotide SPECT/CT | <b>Change in management:</b> 37%                                                                                                              | No SAEs reported<br>3 minor AEs (minor itching the day after injection, unexplained drop in post scan oxygen saturation on room air [98% to 90%], and asymptomatic post scan tachycardia of 112 with a baseline heart rate of 87) | VA Merit Review I01BX007080, SNMMI Clinical Trials Network, Vanderbilt Institute for Clinical and Translational Research grant support (UL1 TR000445 from NCATS/NIH) | Poor                  |
| Frilling, 2010 <sup>45</sup> | NR                                          | <sup>68</sup> Ga-DOTATATE PET/CT vs. CT vs. MRI                               | <b>Change in management:</b> 31/52 (60%), 14 patients had changes in surgical strategy and 17 patients had changes to non-surgical treatments | NR                                                                                                                                                                                                                                | The Dr. Heinz-Horst Deichmann Foundation                                                                                                                             | Poor                  |

**Table 4d. Studies of Treatment Changes due to SSTR-PET for Identification of NETs**

| <b>Author, Year</b>          | <b>Study Design</b> | <b>Population Characteristics</b>                                                                                                                                    | <b>Eligibility Criteria</b>                                                                | <b>Number Approached, Eligible, Enrolled, Analyzed</b>         | <b>Country &amp; Setting</b>              | <b>Duration of Follow-up</b> | <b>Attrition</b> |
|------------------------------|---------------------|----------------------------------------------------------------------------------------------------------------------------------------------------------------------|--------------------------------------------------------------------------------------------|----------------------------------------------------------------|-------------------------------------------|------------------------------|------------------|
| Froeling, 2012 <sup>26</sup> | Retrospective       | Age (mean, years): 41.4; range: 16-78<br>Female: 48%                                                                                                                 | MEN syndrome verified histopathologically or by clinical parameters and imagin modalities. | Approached: NR<br>Eligible: NR<br>Enrolled: 21<br>Analyzed: 21 | Germany<br>Setting unclear                | Mean: 37.8 months            | NR               |
| Gabriel, 2007 <sup>27</sup>  | Prospective cohort  | Age (mean, years): 58.2; range: 28-79<br>Female: 43%<br>Enrolled for initial detection: 15%<br>Enrolled for staging: 43%<br>Enrolled for post therapy follow-up: 42% | Unclear                                                                                    | Approached: NR<br>Eligible: NR<br>Enrolled: 84<br>Analyzed: 84 | Austria<br>Department of Nuclear Medicine | NR                           | NR               |
| Sadowski, 2015 <sup>44</sup> | Prospective cohort  | Age (mean, years): 42 (SD 15); range: 19-82<br>Female: 35%                                                                                                           | NR                                                                                         | Approached: NR<br>Eligible: NR<br>Enrolled: 26<br>Analyzed: 26 | USA<br>NIH Clinical Center                | NR                           | NR               |

**Table 4d. Studies of Treatment Changes due to SSTR-PET for Identification of NETs**

| Author, Year                 | Confounders Adjusted for in Analysis | Imaging Tests                                                                                            | Outcomes                                                                                                                                                                                        | Adverse Events/Harms                              | Sponsor                                                                                                                                                        | Quality Rating |
|------------------------------|--------------------------------------|----------------------------------------------------------------------------------------------------------|-------------------------------------------------------------------------------------------------------------------------------------------------------------------------------------------------|---------------------------------------------------|----------------------------------------------------------------------------------------------------------------------------------------------------------------|----------------|
| Froeling, 2012 <sup>26</sup> | NR                                   | <sup>68</sup> Ga-DOTATOC PET/CT vs. <sup>68</sup> Ga-DOTATOC PET vs. CT                                  | <b>Change in treatment:</b> 47.6% (10/21); 9 patients had an additional indication for surgery and 1 had an additional surgery and a cancellation of a surgery; no change in pharmacotherapy.   | NR                                                | NR                                                                                                                                                             | Poor           |
| Gabriel, 2007 <sup>27</sup>  | NR                                   | <sup>68</sup> Ga-DOTATOC PET vs. <sup>99m</sup> Tc-HYNIC-TOC or <sup>111</sup> In-DOTATOC SPECT/CT or CT | <b>Clinically valuable information</b><br>Vs. CT alone: 21.4% (18/84)<br>Vs. SPECT: 14.3% (12/84)                                                                                               | No side effects were noted after tracer injection | NR                                                                                                                                                             | Poor           |
| Sadowski, 2015 <sup>44</sup> | NR                                   | <sup>68</sup> Ga-DOTATATE PET/CT vs. <sup>111</sup> In-pentetreotide SPECT/CT vs. CT vs. MRI             | <b>Change in management:</b> 8/26 (31%), 7 patients had surgical resection of the primary or metastatic disease and 1 patient had systemic therapy recommended for progressive metastatic NETs. | NR                                                | Center for Cancer Research, National Cancer Institute, and the National Institute of Diabetes and Digestive and Kidney Diseases, National Institutes of Health | Poor           |

**Table 4d. Studies of Treatment Changes due to SSTR-PET for Identification of NETs**

| <b>Author, Year</b>          | <b>Study Design</b>         | <b>Population Characteristics</b>                                                                                                                                                                                                                                                                                                                                                                                                                                           | <b>Eligibility Criteria</b>                                                                                                                                                                                                       | <b>Number Approached, Eligible, Enrolled, Analyzed</b>                              | <b>Country &amp; Setting</b> | <b>Duration of Follow-up</b> | <b>Attrition</b> |
|------------------------------|-----------------------------|-----------------------------------------------------------------------------------------------------------------------------------------------------------------------------------------------------------------------------------------------------------------------------------------------------------------------------------------------------------------------------------------------------------------------------------------------------------------------------|-----------------------------------------------------------------------------------------------------------------------------------------------------------------------------------------------------------------------------------|-------------------------------------------------------------------------------------|------------------------------|------------------------------|------------------|
| Sadowski, 2016 <sup>33</sup> | Prospective cross-sectional | <p>Age (mean, years): 51; range: 19-82</p> <p>Female: 56%</p> <p>Patients with symptoms: 55%</p> <p>Chromogranin A (median, ng/mL): 87.5; range: 20-18,710</p> <p>Previous surgery: 77.5%</p> <p>-Pancreatic NET: 44.9%</p> <p>-Gastro-enteric NET: 55.1%</p> <p>Prior proven NET</p> <p>-Pancreatic: 27.5%</p> <p>-Small/large bowel: 23.7%/3.0%</p> <p>-Insulinoma: 5.3%</p> <p>-Gastric: 5.3%</p> <p>-Thymic carcinoid: 0.8%</p> <p>-Vipoma: 1.5%</p> <p>-Lung: 0.8%</p> | Nonpregnant patients ≥18 years old, suspected or known to have GEPNETs on imaging (CT, MRI, <sup>18</sup> F-FDG PET) and/or biochemical evidence of GEPNETs, and/or a familial predisposition to NET (MEN1 or von Hippel-Lindau). | <p>Approached: NR</p> <p>Eligible: NR</p> <p>Enrolled: 131</p> <p>Analyzed: 131</p> | USA<br>Setting unclear       | NR                           | NR               |

**Table 4d. Studies of Treatment Changes due to SSTR-PET for Identification of NETs**

| <b>Author, Year</b>          | <b>Confounders Adjusted for in Analysis</b> | <b>Imaging Tests</b>                                                                         | <b>Outcomes</b>                             | <b>Adverse Events/Harms</b> | <b>Sponsor</b>                                                                                                                                                                 | <b>Quality Rating</b> |
|------------------------------|---------------------------------------------|----------------------------------------------------------------------------------------------|---------------------------------------------|-----------------------------|--------------------------------------------------------------------------------------------------------------------------------------------------------------------------------|-----------------------|
| Sadowski, 2016 <sup>33</sup> | NR                                          | <sup>68</sup> Ga-DOTATATE PET/CT vs. <sup>111</sup> In-pentetreotide SPECT/CT vs. CT vs. MRI | <b>Change in management:</b> 32.8% (43/131) | NR                          | Intramural Research Programs of the Center for Cancer Research, National Cancer Institute, and the National Institute of Diabetes and Digestive and Kidney Diseases at the NIH | Poor                  |

**Table 4d. Studies of Treatment Changes due to SSTR-PET for Identification of NETs**

| <b>Author, Year</b>               | <b>Study Design</b> | <b>Population Characteristics</b>                                                                                                                                                         | <b>Eligibility Criteria</b>                                                         | <b>Number Approached, Eligible, Enrolled, Analyzed</b>         | <b>Country &amp; Setting</b>   | <b>Duration of Follow-up</b> | <b>Attrition</b> |
|-----------------------------------|---------------------|-------------------------------------------------------------------------------------------------------------------------------------------------------------------------------------------|-------------------------------------------------------------------------------------|----------------------------------------------------------------|--------------------------------|------------------------------|------------------|
| Van Binnebeek, 2016 <sup>36</sup> | Prospective trial   | Age (mean, years): 59; range: 31-80<br>Female: 57%<br>Primary site<br>-GEP: 74%<br>-Lung: 7.5%<br>-Merckel cell carcinomas: 3.9%<br>-Breast: 1.8%<br>-Kidney: 1.8%<br>-Other/unknown: 11% | Patients with metastatic NET, enrolled in a prospective phase II monocentric trial. | Approached: NR<br>Eligible: NR<br>Enrolled: 53<br>Analyzed: 53 | Belgium<br>University hospital | NR                           | NR               |

**Table 4d. Studies of Treatment Changes due to SSTR-PET for Identification of NETs**

| <b>Author, Year</b>               | <b>Confounders Adjusted for in Analysis</b> | <b>Imaging Tests</b>                                                         | <b>Outcomes</b>                         | <b>Adverse Events/Harms</b> | <b>Sponsor</b> | <b>Quality Rating</b> |
|-----------------------------------|---------------------------------------------|------------------------------------------------------------------------------|-----------------------------------------|-----------------------------|----------------|-----------------------|
| Van Binnebeek, 2016 <sup>36</sup> | NR                                          | <sup>68</sup> Ga-DOTATOC PET/CT vs. <sup>111</sup> In-pentetreotide SPECT/CT | <b>Change in management:</b> 13% (7/53) | NR                          | NR             | Poor                  |

Abbreviations: AE= adverse effect; CT= computed tomography; F= fluorine; FDG= fluorodeoxyglucose; Ga= Gallium; GEPNET= gastroenteropancreatic neuroendocrine tumor; HYNIC-octreotide= hydrazinonicotinyl-Tyr3-octreotide; In= indium; MEN1= multiple endocrine neoplasia type 1; MRI= magnetic resonance imaging; NET= neuroendocrine tumor; NIH= National Institutes of Health; NR= not reported; PET= positron emission tomography; SAE= serious adverse effects; SD= standard deviation;SNMMI= Society of Nuclear Medicine and Molecular Imaging; SPECT= single photon emission computed tomography.

## Appendix 5. Quality Assessment Criteria

### Cohort Studies

#### Initial Assembly of Comparable Groups

- Did the study attempt to enroll a random sample or consecutive patients meeting inclusion criteria (inception cohort)?
- Were the groups comparable at baseline?
- Did the study use accurate methods for ascertaining exposures, potential confounders, and outcomes?

#### Maintenance of Comparable Groups

- Did the article report attrition?
- Is there important differential loss to follow-up or overall high loss to follow-up?

#### Measurements: Equal, Reliable, and Valid

- Were outcomes pre-specified and defined, and ascertained using accurate methods?
- Were outcome assessors and/or data analysts blinded to treatment?
- Did the study perform appropriate statistical analyses on potential confounders?

Response options for all questions: Yes, no, unclear, or not applicable

Overall rating options: Good, fair, or poor

#### *Definition of ratings based on above criteria:*

**Good:** Meets all criteria: Comparable groups are assembled initially and maintained throughout the study (follow-up  $\geq 80\%$ ); reliable and valid measurement instruments are used and applied equally to the groups; interventions are spelled out clearly; important outcomes are considered; and appropriate attention to confounders in analysis.

**Fair:** Studies will be graded “fair” if any or all of the following problems occur, without the important limitations noted in the “poor” category below: Generally comparable groups are assembled initially but some question remains whether some (although not major) differences occurred in follow-up; measurement instruments are acceptable (although not the best) and generally applied equally; some but not all important outcomes are considered; and some but not all potential confounders are accounted for.

**Poor:** Studies will be graded “poor” if any of the following major limitations exists: Groups assembled initially are not close to being comparable or maintained throughout the study; unreliable or invalid measurement instruments are used or not applied at all equally among groups (including not masking outcome assessment); and key confounders are given little or no attention.

**Source:** U.S. Preventive Services Task Force. U.S. Preventive Services Task Force Procedure Manual<sup>18</sup>



## Appendix 5. Quality Assessment Criteria

### Diagnostic Accuracy Studies

#### Patient Selection

- Was a consecutive or random sample of patients enrolled?
- Was a case-control design avoided?
- Did the study avoid inappropriate exclusions?

#### Index Test(s)

- Were the index test results interpreted without knowledge of the results of the reference standard?
- If a threshold was used, was it pre-specified?

#### Reference Standard

- Is the reference standard likely to correctly classify the target condition?
- Were the reference standard results interpreted without knowledge of the results of the index test?

#### Flow and Timing

- Was there an appropriate interval between index test(s) and reference standard?
- Did all patients receive a reference standard?
- Did patients receive the same reference standard?
- Were all patients included in the analysis?

Response options for all questions: Yes, no, unclear, or not applicable

Overall rating options: Good, fair, or poor

#### *Definition of ratings based on above criteria:*

- Good:** Evaluates relevant available screening test; uses a credible reference standard; interprets reference standard independently of screening test; reliability of test assessed; has few or handles indeterminate results in a reasonable manner; includes large number (>100) broad-spectrum patients with and without disease; study attempts to enroll a random or consecutive sample of patients who meet inclusion criteria screening cutoffs pre-stated.
- Fair:** Evaluates relevant available screening test; uses reasonable although not best standard; interprets reference standard independent of screening test; moderate sample size (50 to 100 subjects) and a “medium” spectrum of patients (i.e. applicable to most screening settings).
- Poor:** Has important limitation such as: uses inappropriate reference standard; screening test improperly administered; biased ascertainment of reference standard; very small sample size of very narrow selected spectrum of patients.

**Source:** Quality Assessment of Diagnostic Accuracy Studies-2 (QUADAS-2) Criteria<sup>19</sup>

## **Appendix 6. Quality Assessment Tables**

**Table 6a. Quality Assessment of Studies of Diagnostic Accuracy**

|                                   | Patient Selection                                        |                                    |                                               | Index Test(s)                                                                                       |                                                | Reference Standard                                                           |                                                                                                      |
|-----------------------------------|----------------------------------------------------------|------------------------------------|-----------------------------------------------|-----------------------------------------------------------------------------------------------------|------------------------------------------------|------------------------------------------------------------------------------|------------------------------------------------------------------------------------------------------|
| Author, year                      | Was a consecutive or random sample of patients enrolled? | Was a case-control design avoided? | Did the study avoid inappropriate exclusions? | Were the index test results interpreted without knowledge of the results of the reference standard? | If a threshold was used, was it pre-specified? | Is the reference standard likely to correctly classify the target condition? | Were the reference standard results interpreted with out knowledge of the results of the index text? |
| Deppen, 2016 <sup>24</sup>        | Yes, consecutive                                         | No                                 | Yes                                           | Yes                                                                                                 | Not applicable                                 | Yes                                                                          | Unclear                                                                                              |
| Etchebehere, 2014 <sup>25</sup>   | Yes, consecutive                                         | No                                 | Yes                                           | Yes                                                                                                 | Not applicable                                 | Unclear                                                                      | No                                                                                                   |
| Froeling, 2012 <sup>26</sup>      | Unclear                                                  | Unclear                            | Yes                                           | Yes                                                                                                 | Yes                                            | Yes                                                                          | Unclear                                                                                              |
| Gabriel, 2007 <sup>27</sup>       | Yes, consecutive                                         | Yes                                | Yes                                           | Yes                                                                                                 | Not applicable                                 | Yes                                                                          | Yes                                                                                                  |
| Has Simsek, 2014 <sup>28</sup>    | Yes, consecutive                                         | No                                 | Yes                                           | Unclear                                                                                             | Not applicable                                 | Unclear                                                                      | Yes                                                                                                  |
| Kumar, 2011 <sup>29</sup>         | Unclear                                                  | Unclear                            | Unclear                                       | Yes                                                                                                 | Not applicable                                 | Yes                                                                          | No                                                                                                   |
| Lococo, 2015 <sup>30</sup>        | Yes, consecutive                                         | No                                 | Yes                                           | Yes                                                                                                 | Not applicable                                 | Yes                                                                          | Unclear                                                                                              |
| Morgat, 2016 <sup>31</sup>        | Yes, consecutive                                         | No                                 | Yes                                           | Yes                                                                                                 | Not applicable                                 | Yes                                                                          | No                                                                                                   |
| Putzer, 2009 <sup>32</sup>        | Unclear                                                  | No                                 | Unclear                                       | Yes                                                                                                 | Not applicable                                 | Yes                                                                          | No                                                                                                   |
| Sadowski, 2016 <sup>33</sup>      | Unclear                                                  | Yes                                | Unclear                                       | Yes                                                                                                 | Not applicable                                 | Yes                                                                          | Unclear                                                                                              |
| Schraml, 2013 <sup>34</sup>       | Yes, consecutive                                         | No                                 | Unclear                                       | Yes                                                                                                 | Not applicable                                 | Yes                                                                          | No                                                                                                   |
| Schreiter, 2012 <sup>35</sup>     | Yes, consecutive                                         | No                                 | Yes                                           | Unclear                                                                                             | Yes                                            | Yes                                                                          | Unclear                                                                                              |
| Van Binnebeek, 2016 <sup>36</sup> | Unclear                                                  | No                                 | Unclear                                       | Yes                                                                                                 | Not applicable                                 | Unclear                                                                      | No                                                                                                   |
| Venkitaraman, 2014 <sup>37</sup>  | Yes, all                                                 | Yes                                | Yes                                           | Yes                                                                                                 | Not applicable                                 | Yes                                                                          | Yes                                                                                                  |
| Versari, 2010 <sup>38</sup>       | Yes, consecutive                                         | Yes                                | Yes                                           | No                                                                                                  | Not applicable                                 | Yes                                                                          | No                                                                                                   |

**Table 6a. Quality Assessment of Studies of Diagnostic Accuracy**

| Flow and Timing                   |                                                                                 |                                                |                                                   |                                            |                |
|-----------------------------------|---------------------------------------------------------------------------------|------------------------------------------------|---------------------------------------------------|--------------------------------------------|----------------|
| Author, year                      | Was there an appropriate interval between index test(s) and reference standard? | Did all patients receive a reference standard? | Did patients receive the same reference standard? | Were all patents included in the analysis? | Quality rating |
| Deppen, 2016 <sup>24</sup>        | Yes                                                                             | No                                             | No                                                | Yes                                        | Fair           |
| Etchebehere, 2014 <sup>25</sup>   | Yes                                                                             | Yes                                            | No                                                | Yes                                        | Fair           |
| Froeling, 2012 <sup>26</sup>      | Yes                                                                             | Yes                                            | Yes                                               | Yes                                        | Fair           |
| Gabriel, 2007 <sup>27</sup>       | Yes                                                                             | Yes                                            | Yes                                               | Yes                                        | Good           |
| Has Simsek, 2014 <sup>28</sup>    | Yes                                                                             | Yes                                            | Yes                                               | Yes                                        | Poor           |
| Kumar, 2011 <sup>29</sup>         | Unclear                                                                         | Yes                                            | Yes                                               | Yes                                        | Poor           |
| Lococo, 2015 <sup>30</sup>        | Yes                                                                             | Yes                                            | Yes                                               | Yes                                        | Poor           |
| Morgat, 2016 <sup>31</sup>        | Yes                                                                             | Yes                                            | Yes                                               | Yes                                        | Fair           |
| Putzer, 2009 <sup>32</sup>        | Yes                                                                             | Yes                                            | Yes                                               | Yes                                        | Fair           |
| Sadowski, 2016 <sup>33</sup>      | Unclear                                                                         | Yes                                            | Unclear                                           | Yes                                        | Poor           |
| Schraml, 2013 <sup>34</sup>       | Yes                                                                             | Yes                                            | Unclear                                           | Yes                                        | Fair           |
| Schreiter, 2012 <sup>35</sup>     | Unclear                                                                         | Yes                                            | Yes                                               | Yes                                        | Fair           |
| Van Binnebeek, 2016 <sup>36</sup> | Yes                                                                             | Yes                                            | No                                                | Yes                                        | Poor           |
| Venkitaraman, 2014 <sup>37</sup>  | Unclear                                                                         | Yes                                            | Yes                                               | Yes                                        | Good           |
| Versari, 2010 <sup>38</sup>       | Yes                                                                             | Yes                                            | No                                                | Yes                                        | Fair           |

**Table 6b. Quality Assessment of Cohort Studies**

| <b>Author, Year</b>               | <b>Did the study attempt to enroll a random sample or consecutive patients meeting inclusion criteria (inception cohort)?</b> | <b>Did the study use accurate methods for ascertaining exposures, potential confounders, and outcomes?</b> | <b>Were outcome assessors and/or data analysts blinded to treatment?</b> | <b>Did the article report attrition?</b> | <b>Is there important differential loss to follow-up or overall high loss to follow-up?</b> | <b>Were outcomes pre-specified and defined, and ascertained using accurate methods?</b> | <b>Quality rating</b> |
|-----------------------------------|-------------------------------------------------------------------------------------------------------------------------------|------------------------------------------------------------------------------------------------------------|--------------------------------------------------------------------------|------------------------------------------|---------------------------------------------------------------------------------------------|-----------------------------------------------------------------------------------------|-----------------------|
| Deppen, 2016 <sup>24</sup>        | Yes, consecutive                                                                                                              | Yes                                                                                                        | Yes                                                                      | No                                       | Unclear                                                                                     | No                                                                                      | Poor                  |
| Frilling, 2010 <sup>45</sup>      | Yes, consecutive                                                                                                              | Yes                                                                                                        | No                                                                       | No                                       | Unclear                                                                                     | No                                                                                      | Poor                  |
| Froeling, 2012 <sup>26</sup>      | Unclear                                                                                                                       | Yes                                                                                                        | Yes                                                                      | No                                       | Unclear                                                                                     | No                                                                                      | Poor                  |
| Gabriel, 2007 <sup>27</sup>       | Yes, consecutive                                                                                                              | Yes                                                                                                        | Yes                                                                      | No                                       | Unclear                                                                                     | No                                                                                      | Poor                  |
| Sadowski, 2015 <sup>44</sup>      | Unclear                                                                                                                       | Yes                                                                                                        | No                                                                       | No                                       | Unclear                                                                                     | No                                                                                      | Poor                  |
| Sadowski, 2016 <sup>33</sup>      | Unclear                                                                                                                       | Yes                                                                                                        | Yes                                                                      | No                                       | Unclear                                                                                     | No                                                                                      | Poor                  |
| Van Binnebeek, 2016 <sup>36</sup> | Unclear                                                                                                                       | Yes                                                                                                        | Yes                                                                      | No                                       | Unclear                                                                                     | No                                                                                      | Poor                  |

## Appendix 7. Strength of Evidence Table

| Outcome                                                                                      | Number of Studies<br>Study Design | Risk of Bias | Inconsistency    | Indirectness    | Imprecision    | Strength of<br>Evidence | Main Findings                                                                                                                                                             |
|----------------------------------------------------------------------------------------------|-----------------------------------|--------------|------------------|-----------------|----------------|-------------------------|---------------------------------------------------------------------------------------------------------------------------------------------------------------------------|
| <b>Key Question 1. Diagnostic accuracy of SSTR-PET versus OctreoScan, FDG-PET, or CT/MRI</b> |                                   |              |                  |                 |                |                         |                                                                                                                                                                           |
| <b>SSTR-PET vs. Octreoscan</b>                                                               |                                   |              |                  |                 |                |                         |                                                                                                                                                                           |
| NETs*                                                                                        |                                   |              |                  |                 |                |                         |                                                                                                                                                                           |
| <i>Sensitivity</i>                                                                           | 5 diagnostic accuracy studies     | Moderate     | No inconsistency | No indirectness | Imprecise      | Low                     | <ul style="list-style-type: none"> <li>97% vs. 83%, p=0.01</li> <li>96% vs. 60%, p=0.03</li> </ul>                                                                        |
| <i>Specificity</i>                                                                           | 2 diagnostic accuracy studies     | Moderate     | No inconsistency | No indirectness | Imprecise      | Low                     | <ul style="list-style-type: none"> <li>No differences</li> </ul>                                                                                                          |
| GEP NETs                                                                                     |                                   |              |                  |                 |                |                         |                                                                                                                                                                           |
| <i>Sensitivity</i>                                                                           | 1 diagnostic accuracy study       | Moderate     | Unable to assess | No indirectness | Imprecise      | Very low                | <ul style="list-style-type: none"> <li>76% vs. 20%, p&lt;0.0001</li> </ul>                                                                                                |
| <i>Specificity</i>                                                                           | 1 diagnostic accuracy study       | Moderate     | Unable to assess | No indirectness | Imprecise      | Very low                | <ul style="list-style-type: none"> <li>100% vs. 50%, p&lt;0.01</li> </ul>                                                                                                 |
| Metastatic NETs                                                                              |                                   |              |                  |                 |                |                         |                                                                                                                                                                           |
| <i>Sensitivity</i>                                                                           | 2 diagnostic accuracy studies     | High         | No inconsistency | No indirectness | No imprecision | Low                     | <ul style="list-style-type: none"> <li>95% vs. 31%, p&lt;0.001</li> <li>99.9% vs. 60%, p&lt;0.01</li> </ul>                                                               |
| <i>Specificity</i>                                                                           | No studies                        | --           | --               | --              | --             | --                      | <ul style="list-style-type: none"> <li>No data</li> </ul>                                                                                                                 |
| <b>SSTR-PET vs. FDG-PET</b>                                                                  |                                   |              |                  |                 |                |                         |                                                                                                                                                                           |
| GEP NETs                                                                                     |                                   |              |                  |                 |                |                         |                                                                                                                                                                           |
| <i>Sensitivity</i>                                                                           | 2 diagnostic accuracy studies     | High         | No inconsistency | No indirectness | Imprecise      | Very low                | <ul style="list-style-type: none"> <li>95% vs. 37%, p not reported</li> <li>100% vs. 25%, p=0.03</li> </ul>                                                               |
| <i>Specificity</i>                                                                           | No studies                        | --           | --               | --              | --             | --                      | <ul style="list-style-type: none"> <li>No data</li> </ul>                                                                                                                 |
| Pulmonary carcinoid                                                                          |                                   |              |                  |                 |                |                         |                                                                                                                                                                           |
| <i>Sensitivity</i>                                                                           | 2 diagnostic accuracy studies     | Moderate     | No inconsistency | No indirectness | Imprecise      | Low                     | <ul style="list-style-type: none"> <li>96% (80% to 99.9%) vs. 69% (48% to 86%)</li> <li>79% vs. 55%, p=0.13</li> </ul>                                                    |
| <i>Specificity</i>                                                                           | 1 diagnostic accuracy study       | Low          | Unable to assess | No indirectness | Imprecise      | Low                     | <ul style="list-style-type: none"> <li>No differences</li> </ul>                                                                                                          |
| <b>SSTR-PET vs. CT/MRI</b>                                                                   |                                   |              |                  |                 |                |                         |                                                                                                                                                                           |
| NETs*                                                                                        |                                   |              |                  |                 |                |                         |                                                                                                                                                                           |
| <i>Sensitivity</i>                                                                           | 2 diagnostic accuracy studies     | Moderate     | No inconsistency | No indirectness | Imprecise      | Low                     | <ul style="list-style-type: none"> <li>97% vs. 61%, p&lt;0.001</li> <li>96% vs. 72%, p=0.08</li> </ul>                                                                    |
| <i>Specificity</i>                                                                           | 2 diagnostic accuracy studies     | Moderate     | Inconsistent     | No indirectness | Imprecise      | Very low                | <ul style="list-style-type: none"> <li>92% vs. 71%, p&lt;0.001</li> <li>97% vs. 100%</li> </ul>                                                                           |
| GEP NETs                                                                                     |                                   |              |                  |                 |                |                         |                                                                                                                                                                           |
| <i>Sensitivity</i>                                                                           | 4 diagnostic accuracy studies     | Moderate     | No inconsistency | No indirectness | Imprecise      | Low                     | <ul style="list-style-type: none"> <li>76% vs. 60%, p&lt;0.0001</li> <li>92% vs. 43%, p&lt;0.001</li> <li>85% vs. 73%, p&gt;0.05</li> <li>100% vs. 83%, p=0.06</li> </ul> |
| <i>Specificity</i>                                                                           | 3 diagnostic accuracy studies     | Moderate     | No inconsistency | No indirectness | Imprecise      | Low                     | <ul style="list-style-type: none"> <li>100% vs. 50%, p&lt;0.01</li> <li>94% vs. 61%, p&lt;0.001</li> <li>83% vs. 80%, p&gt;0.05</li> </ul>                                |

## Appendix 7. Strength of Evidence Table

| Outcome                                                                                                                                                 | Number of Studies<br>Study Design | Risk of Bias | Inconsistency    | Indirectness    | Imprecision    | Strength of<br>Evidence | Main Findings                                                                                                                                                                                                                                                                                     |
|---------------------------------------------------------------------------------------------------------------------------------------------------------|-----------------------------------|--------------|------------------|-----------------|----------------|-------------------------|---------------------------------------------------------------------------------------------------------------------------------------------------------------------------------------------------------------------------------------------------------------------------------------------------|
| Unknown primary or metastatic NET                                                                                                                       |                                   |              |                  |                 |                |                         |                                                                                                                                                                                                                                                                                                   |
| <i>Sensitivity</i>                                                                                                                                      | 1 diagnostic accuracy study       | High         | Unable to assess | No indirectness | Imprecise      | Very low                | <ul style="list-style-type: none"> <li>95% vs. 45%, p&lt;0.001</li> </ul>                                                                                                                                                                                                                         |
| <i>Specificity</i>                                                                                                                                      | No studies                        | --           | --               | --              | --             | --                      | <ul style="list-style-type: none"> <li>No data</li> </ul>                                                                                                                                                                                                                                         |
| Metastatic NETs                                                                                                                                         |                                   |              |                  |                 |                |                         |                                                                                                                                                                                                                                                                                                   |
| <i>Sensitivity</i>                                                                                                                                      | 3 diagnostic accuracy studies     | Moderate     | Inconsistent     | No indirectness | Imprecise      | Very low                | <ul style="list-style-type: none"> <li>97% vs. 58%, p&lt;0.001</li> <li>90% to 98% across modalities</li> <li>74% vs. 68% to 88%</li> </ul>                                                                                                                                                       |
| <i>Specificity</i>                                                                                                                                      | 3 diagnostic accuracy studies     | Moderate     | No inconsistency | No indirectness | Imprecise      | Low                     | <ul style="list-style-type: none"> <li>92% vs. 99.8%</li> <li>90% to 100% across modalities</li> <li>85% to 88% across modalities</li> </ul>                                                                                                                                                      |
| <b>Key Question 2. Predictive utility of SSTR-PET for predicting response to somatostatin analogue therapy or PRRT or somatostatin analogue therapy</b> |                                   |              |                  |                 |                |                         |                                                                                                                                                                                                                                                                                                   |
| <i>Diagnostic accuracy</i>                                                                                                                              | No comparative studies            | --           | --               | --              | --             | --                      | <ul style="list-style-type: none"> <li>No comparative studies; 2 studies of SSTR-PET/CT reported sensitivity/specificity of 75% and 64% for response to octreotide (well-differentiated NET of ileum) and sensitivity/specificity of 95% and 60% for response to PRRT (metastatic NET)</li> </ul> |
| <b>Key Question 3. Effects of SSTR-PET for restaging on quality of life, patient management, and patient clinical outcomes</b>                          |                                   |              |                  |                 |                |                         |                                                                                                                                                                                                                                                                                                   |
| <i>Proportion of patients with treatment change</i>                                                                                                     | 6 uncontrolled studies            | High         | No inconsistency | No indirectness | No imprecision | Very low                | <ul style="list-style-type: none"> <li>Proportion with change in management ranged from 8.4% to 60%, most studies reported &gt;30%</li> </ul>                                                                                                                                                     |

Abbreviations: CT= computed tomography; FDG= fluorodeoxyglucose; GEP= gastroenteropancreatic; MRI= magnetic resonance imaging; NET= neuroendocrine tumor; PET= positron emission tomography; PRRT= peptide receptor radionuclide therapy; SSTR= somatostatin receptor.
